# Supplementary material for: Clinical outcome of non-alcoholic fatty liver disease: an 11-year follow-up study
Source: PubMed Central journal article supplement — BMJ Open. 2022 Jun 27;12(6):e054891. doi: 10.1136/bmjopen-2021-054891 (PMC9237861; doi:10.1136/bmjopen-2021-054891), 2022-06-27
Supplement: bmjopen-2021-054891.draft_revisions.pdf [file bmjopen-2021-054891.draft_revisions.pdf]

# BMJ Open

BMJ Open is committed to open peer review. As part of this commitment we make the peer review history of every article we publish publicly available.

When an article is published we post the peer reviewers' comments and the authors' responses online. We also post the versions of the paper that were used during peer review. These are the versions that the peer review comments apply to.

The versions of the paper that follow are the versions that were submitted during the peer review process. They are not the versions of record or the final published versions. They should not be cited or distributed as the published version of this manuscript.

BMJ Open is an open access journal and the full, final, typeset and author-corrected version of record of the manuscript is available on our site with no access controls, subscription charges or pay-per-view fees (<http://bmjopen.bmj.com>).

If you have any questions on BMJ Open's open peer review process please email [info.bmjopen@bmj.com](mailto:info.bmjopen@bmj.com)

# BMJ Open

## Clinical outcome of nonalcoholic fatty liver disease: an eleven-year follow-up study

|                               |                                                                                                                                                                                                                                                                                                                                                                                                                                                                                                                                                                                                                                                                                                                                                                                                                                                                                                                                                                                                                                                                                                                                                                                                                                                                                                                                                                                                                                                                                                                                                                                                                                                                                                                                                                       |
|-------------------------------|-----------------------------------------------------------------------------------------------------------------------------------------------------------------------------------------------------------------------------------------------------------------------------------------------------------------------------------------------------------------------------------------------------------------------------------------------------------------------------------------------------------------------------------------------------------------------------------------------------------------------------------------------------------------------------------------------------------------------------------------------------------------------------------------------------------------------------------------------------------------------------------------------------------------------------------------------------------------------------------------------------------------------------------------------------------------------------------------------------------------------------------------------------------------------------------------------------------------------------------------------------------------------------------------------------------------------------------------------------------------------------------------------------------------------------------------------------------------------------------------------------------------------------------------------------------------------------------------------------------------------------------------------------------------------------------------------------------------------------------------------------------------------|
| Journal:                      | <i>BMJ Open</i>                                                                                                                                                                                                                                                                                                                                                                                                                                                                                                                                                                                                                                                                                                                                                                                                                                                                                                                                                                                                                                                                                                                                                                                                                                                                                                                                                                                                                                                                                                                                                                                                                                                                                                                                                       |
| Manuscript ID                 | bmjopen-2021-054891                                                                                                                                                                                                                                                                                                                                                                                                                                                                                                                                                                                                                                                                                                                                                                                                                                                                                                                                                                                                                                                                                                                                                                                                                                                                                                                                                                                                                                                                                                                                                                                                                                                                                                                                                   |
| Article Type:                 | Original research                                                                                                                                                                                                                                                                                                                                                                                                                                                                                                                                                                                                                                                                                                                                                                                                                                                                                                                                                                                                                                                                                                                                                                                                                                                                                                                                                                                                                                                                                                                                                                                                                                                                                                                                                     |
| Date Submitted by the Author: | 12-Oct-2021                                                                                                                                                                                                                                                                                                                                                                                                                                                                                                                                                                                                                                                                                                                                                                                                                                                                                                                                                                                                                                                                                                                                                                                                                                                                                                                                                                                                                                                                                                                                                                                                                                                                                                                                                           |
| Complete List of Authors:     | <p>Tang, Xiaoping ; Ningbo Zhenhai District Lianhua Hospital , Department of Prevention and Health Care</p> <p>Shi, Yanyan; Peking University Third Hospital, Research Center of Clinical Epidemiology</p> <p>Du, Juan ; Ningbo Zhenhai District Lianhua Hospital , Department of Internal Medicine</p> <p>Hu, Keming; Ningbo Zhenhai District Lianhua Hospital, Department of Prevention and Health Care</p> <p>Zhou, Tingting; Ningbo Zhenhai District Lianhua Hospital , Department of Internal Medicine</p> <p>Chen, Lan; Ningbo Zhenhai District Lianhua Hospital , Department of Radiology</p> <p>Zhang, Yanming; Ningbo Zhenhai District Lianhua Hospital , Center Laboratory</p> <p>Li, Fujun; Ningbo Zhenhai District Lianhua Hospital , Department of Radiology</p> <p>Zhang, Huier ; Ningbo Zhenhai District Lianhua Hospital , Center Laboratory</p> <p>Liebe, Roman ; Heinrich Heine University Düsseldorf, Clinic of Gastroenterology, Hepatology and Infectious Diseases,; Saarland University, Department of Medicine II, Saarland University Medical Center</p> <p>Meyer, Christoph ; Heidelberg University, Department of Medicine II, Medical Faculty Mannheim</p> <p>Dooley, Steven ; Heidelberg University, Department of Medicine II, Medical Faculty Mannheim</p> <p>Zhu, Zhongwei; Ningbo Zhenhai District Lianhua Hospital , Department of Surgery</p> <p>Weng, Hong-Lei ; Heidelberg University, Department of Medicine II, Medical Faculty Mannheim</p> <p>JIA, Jinzhu; Peking University, Department of Biostatistics, School of Public Health; Peking University, Center for Statistical Science</p> <p>Huang, Tong; Ningbo City First Hospital; Ningbo Zhenhai District Lianhua Hospital , Department of Prevention and Health Care</p> |
| Keywords:                     | Epidemiology < INFECTIOUS DISEASES, Hypertension < CARDIOLOGY, DIABETES & ENDOCRINOLOGY, Health & safety < HEALTH SERVICES ADMINISTRATION & MANAGEMENT, Health informatics < BIOTECHNOLOGY & BIOINFORMATICS                                                                                                                                                                                                                                                                                                                                                                                                                                                                                                                                                                                                                                                                                                                                                                                                                                                                                                                                                                                                                                                                                                                                                                                                                                                                                                                                                                                                                                                                                                                                                           |

1  
2  
3  
4  
5  
6  
7  
8  
9  
10  
11  
12  
13  
14  
15  
16  
17  
18  
19  
20  
21  
22  
23  
24  
25  
26  
27  
28  
29  
30  
31  
32  
33  
34  
35  
36  
37  
38  
39  
40  
41  
42  
43  
44  
45  
46  
47  
48  
49  
50  
51  
52  
53  
54  
55  
56  
57  
58  
59  
60

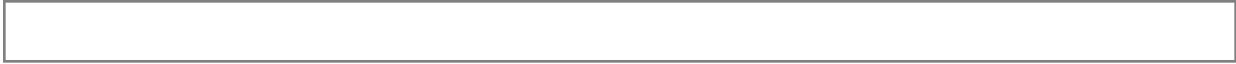

SCHOLARONE™  
Manuscripts

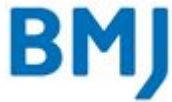

I, the Submitting Author has the right to grant and does grant on behalf of all authors of the Work (as defined in the below author licence), an exclusive licence and/or a non-exclusive licence for contributions from authors who are: i) UK Crown employees; ii) where BMJ has agreed a CC-BY licence shall apply, and/or iii) in accordance with the terms applicable for US Federal Government officers or employees acting as part of their official duties; on a worldwide, perpetual, irrevocable, royalty-free basis to BMJ Publishing Group Ltd ("BMJ") its licensees and where the relevant Journal is co-owned by BMJ to the co-owners of the Journal, to publish the Work in this journal and any other BMJ products and to exploit all rights, as set out in our [licence](#).

The Submitting Author accepts and understands that any supply made under these terms is made by BMJ to the Submitting Author unless you are acting as an employee on behalf of your employer or a postgraduate student of an affiliated institution which is paying any applicable article publishing charge ("APC") for Open Access articles. Where the Submitting Author wishes to make the Work available on an Open Access basis (and intends to pay the relevant APC), the terms of reuse of such Open Access shall be governed by a Creative Commons licence – details of these licences and which [Creative Commons](#) licence will apply to this Work are set out in our licence referred to above.

Other than as permitted in any relevant BMJ Author's Self Archiving Policies, I confirm this Work has not been accepted for publication elsewhere, is not being considered for publication elsewhere and does not duplicate material already published. I confirm all authors consent to publication of this Work and authorise the granting of this licence.

## Clinical outcome of nonalcoholic fatty liver disease: an eleven-year follow-up study

Xiaoping Tang<sup>1#</sup>, Yanyan Shi<sup>2#</sup>, Juan Du<sup>3#</sup>, Keming Hu<sup>1</sup>, Tingting Zhou<sup>3</sup>, Lan Chen<sup>4</sup>, Yanming Zhang<sup>5</sup>, Fujun Li<sup>4</sup>, Huier Zhang<sup>5</sup>, Roman Liebe<sup>6,7</sup>, Christoph Meyer<sup>8</sup>, Steven Dooley<sup>8</sup>, Zhongwei Zhu<sup>9</sup>, Hong-Lei Weng<sup>8</sup>, Jinzhu Jia<sup>10,11\*</sup>, Tong Huang<sup>1,12\*</sup>

<sup>1</sup> Department of Prevention and Health Care, Ningbo Zhenhai Lianhua Hospital, Ningbo, China

<sup>2</sup> Research Center of Clinical Epidemiology, Peking University Third Hospital, Beijing, China

<sup>3</sup> Department of Internal Medicine, Ningbo Zhenhai Lianhua Hospital, Ningbo, China

<sup>4</sup> Department of Radiology, Ningbo Zhenhai Lianhua Hospital, Ningbo, China

<sup>5</sup> Center Laboratory, Ningbo Zhenhai Lianhua Hospital, Ningbo, China

<sup>6</sup> Clinic of Gastroenterology, Hepatology and Infectious Diseases, Heinrich Heine University, Düsseldorf, Germany;

<sup>7</sup> Department of Medicine II, Saarland University Medical Center, Saarland University, Homburg, Germany;

<sup>8</sup> Department of Medicine II, Medical Faculty Mannheim, Heidelberg University, Mannheim, Germany;

<sup>9</sup> Department of Surgery, Ningbo Zhenhai Lianhua Hospital, Ningbo, China

<sup>10</sup> Department of Biostatistics, School of Public Health, Peking University Health Science Center, Beijing, 100191, P.R. China

<sup>11</sup> Center for Statistical Science, Peking University, Beijing, 100871, P.R. China

<sup>12</sup> Center of health Management, Ningbo No.1 Hospital

# These authors contributed to the project equally.

\* Co-senior authors

### Corresponding authors:

Tong Huang, MD

Center of health Management, Ningbo No.1 Hospital

Address: No. 59, Liuting Street, Haishu District, Ningbo, Zhejiang Province, 315010, P.R. China

Email: nbbjzxht@163.com

Tel: +86-135868350952

1  
2  
3  
4  
5 Jinzhu Jia, PhD.

6 Department of Biostatistics, School of Public Health, Peking University Health Science  
7 Center  
8

9 Address: No. 38, Xueyuan Road, Haidian District, Beijing, 100191, P.R. China

10 Email: jzjia@math.pku.edu.cn

11 Tel: +86-15801049187  
12  
13  
14  
15  
16

17 **Acknowledgements:**

18  
19 This project is supported by the National Key R&D Program of China No. 2017YFC0908103  
20 (X.T., and J.D.). We are grateful to Drs. Changxi Chen, Jingyi Yuan and Yongjun Chen for  
21 support and discussion.  
22  
23  
24  
25

26 **Author contributions:**

27  
28 Conception and design: Xiaoping Tang, Yanyan Shi, Juan Du, Hong-Lei Weng, Jinzhu Jia  
29 and Tong Huang  
30  
31

32 Ultrasonography: Lan Chen, Fujun Li

33 Blood assays: Yanming Zhang and Huier Zhang

34  
35 Other examinations and data collection: Xiaoping Tang, Keming Hu, Tingting Zhou, Juan Du,  
36  
37 Zhongwei Zhu and Tong Huang  
38  
39

40 Statistical analyses: Yanyan Shi and Jinzhu Jia

41  
42 Drafting the article: Hong-Lei Weng  
43  
44

45  
46 Reviewing and editing the article critically: Xiaoping Tang, Yanyan Shi, Christoph Meyer,  
47  
48 Roman Liebe, Steven Dooley, Hong-Lei Weng, Jinzhu Jia and Tong Huang  
49  
50  
51  
52  
53  
54  
55  
56  
57  
58  
59  
60

## Abstract

**Objectives** To clarify NAFLD prevalence, risk factors, and clinical outcome in China, a cohort of company employees was followed up for eleven years.

**Design** Retrospective cohort

**Setting** Between 2006-2016 in China

**Participants** 13032 company employees

**Results** Over eleven years, the prevalence of NAFLD increased from 17.2% to 32.4% (males 20.5% to 37% *versus* females 9.8% to 22.2%). Male peak prevalence was between 40 and 60 years of age, whereas highest prevalence in women was at an age of 60 years and older. Logistic and Cox regression revealed 16 risk factors. However, cause-effect analyses showed that only BMI, gender and triglycerides directly contributed to NAFLD development. Over an 11-year follow-up period, 12.6%, 37.7% and 14.2% of male NAFLD patients and 11.6%, 44.7% and 22.6% of female NAFLD patients developed diabetes, hypertension and hyperuricemia, respectively. Except one male patient who developed cirrhosis, no NAFLD patients progressed into severe liver disease.

**Conclusion** Diabetes, hypertension and hyperuricemia are the main clinical outcomes of NAFLD. Eleven years of NAFLD are not sufficient to cause severe liver disease. Age and obesity are direct risk factors for NAFLD. BMI, gender and triglycerides are three parameters directly reflecting the occurrence of NAFLD.

**(Words: 194)**

### Strengths and limitations of this study

- The current study presented a dynamic NAFLD prevalence in an eastern Chinese community.
- By analyzing cause-effect link, only three parameters BMI, gender and triglycerides were confirmed to directly reflect the occurrence of NAFLD.
- In contrast to the current dogma, severe liver diseases are not the clinical outcomes of NAFLD within eleven years.
- Metabolic syndrome such as diabetes, hypertension and hyperuricemia are the main consequences of NAFLD.
- The current study is a single-center observation. Therefore, a multiple-center study is required to confirm the conclusions.

## Introduction

Non-alcoholic fatty liver disease (NAFLD) is one of the most common causes of chronic liver disease globally [1]. The global prevalence of NAFLD is currently around 25% [2,3]. NAFLD is predicted to become the most frequent indication for liver transplantation by 2030 in Western countries [4]. An analysis based on 18 million patients in four European cohorts showed that NAFLD and non-alcoholic steatohepatitis (NASH) increase the risk of end-stage liver diseases, e.g., cirrhosis and hepatocellular carcinoma (HCC) [5]. Of note, NAFLD is not only a disease restricted to the liver, but also affects extra-hepatic organs. NAFLD is tightly associated with the occurrence of type 2 diabetes mellitus (T2DM), cardiovascular (CVD) and cardiac diseases, and chronic kidney disease (CKD) [4].

In China, the incidence of NAFLD has been increasing over the last two decades. A recent meta-analysis, based on 392 studies between 2008 and 2018, showed the national incidence of NAFLD in China to be at 29.2% [6]. In Shanghai, the adult incidence of NAFLD has increased from 14.04% in 1995 to 43.65% in 2015 [2]. Being a vast country, Chinese living in different areas vary widely in lifestyle and economic status. Thus, the epidemiology, natural history and clinical outcomes of NAFLD in different areas of the country are worth further investigation.

It is well accepted that viral hepatitis is a major reason for progressing chronic liver diseases, e.g., fibrosis, cirrhosis and ultimately, hepatocellular carcinoma (HCC). With regard to NAFLD, incidence and severity of associated chronic liver disease outcomes has not been monitored in large Chinese cohorts yet – especially over a long-time span. The current study therefore describes the prevalence of NAFLD in a large Eastern Chinese community over eleven years (2006 - 2016). We focused on three aspects: (1) annual prevalence of NAFLD, (2) risk factors of NAFLD, and (3) intra- and extra-hepatic clinical outcomes of NAFLD. Noteworthy, NAFLD prevalence is higher in males and peaking between 40 – 60 years, whereas in females, NAFLD is most frequently observed at an age above 60 years. Diabetes, hypertension and hyperuricemia are the main clinical outcomes of NAFLD. Intriguingly, only 1 out of 696 NAFLD patients developed liver cirrhosis within 11-year follow-up and none progress into liver cancer.

## Methods

### *Patient and public involvement*

No patient involved in this study



### *Design and participants*

In this retrospective study we analyzed the "annual health examination database" of the Zhenhai Lianhua Hospital from 2006 to 2016. This hospital is affiliated to Sinopec Zhenhai Refining & Chemical Company. Supported by the company, all employees were offered the opportunity to go to this hospital for an annual health examination. During 11 years, a total 13,032 employees received health examinations. From 2006 to 2016, 11689, 11706, 11584, 9521, 9592, 9725, 9710, 9869, 9718, 9702 and 9706 persons received health examinations (**Figure 1**). To describe the longitudinal NAFLD occurrence in this cohort, we excluded subjects with the following conditions: (1) viral hepatitis B and C infection, which were identified by blood virus measurements (HBV-DNA and HCV-RNA), and (2) alcoholic liver disease, which was defined as previously described [7,8]. NAFLD was defined as the presence of hepatic steatosis, determined by ultrasonography.

The study protocol was approved by the Ethics Committee of Zhenhai Lianhua Hospital ([2016]001). Informed consent was obtained from all subjects.

### *Measures*

**Supplementary Table 1** shows all parameters measured in the annual health examinations. Ultrasonography was performed by the same three experienced doctors (L.C., F. L., and J.Y.) with an Ultrasonograph B, GE, Voluson 730 pro. Blood biochemistry and HBV serum levels were measured by an Olympus AU640 autoanalyzer (Olympus, Kobe, Japan) and an ImmunoAssay Analyzer VitrosECI (JOHNSON-JOHNSON, USA), respectively. All methods were carried out in accordance with relevant guidelines and regulations.

### *Statistical analysis*

For population characteristics, variables were described as means and standard deviation (SD) or proportions as appropriate. Student's t-test or nonparametric test was used to analyze differences between two groups as mentioned. Chi-square test was used to verify the differences of nominative variables between two groups. Multivariate analysis of risk factors for NAFLD was performed using logistic regression analysis. Combined receiver operating characteristic curve (ROC) and area under curve (AUC) analyses were used to evaluate the diagnostic performance of biomarkers based on the logistic regression model. Multivariate Cox regression model was performed to calculate hazard ratios of variables to identify independent prognostic variables. First order Markov models were used to analyze the cause-effect link between

1  
2  
3 NAFLD and risk factors. L1 penalized logistic regression was applied to select predictive  
4 predictors. R package “glmnet” contains functions to select predictors using L1 penalized  
5 logistic regression. Statistical analyses were performed using SPSS 22.0 and R version 3.5.3.  
6  
7  
8 *P*-values that were less than 0.05 were considered statistically significant. Figures were  
9 generated by R package such as ‘forestplot’, ‘ROCR’, ‘bnlearn’, or ‘survival’.

## 15 Results

### 17 *Prevalence of NAFLD from 2006 to 2016*

19 We retrospectively analyzed 9786, 9852, 9827, 8026, 8225, 8309, 8311, 8552, 8442, 8463 and  
20 8436 persons who received health examinations from 2006 to 2016. **Supplementary Table 2**  
21 shows the eleven-year annual NAFLD prevalence in this population. In 2006, NAFLD was  
22 diagnosed in 17.2% of persons, and gradually increased over the examination period to 19%  
23 (2007), 22% (2008), 22.4% (2009), 22.7% (2010), 23.4% (2011), 24.5% (2012), 25.4% (2013),  
24 27.9% (2014), 30.8% (2015), and 32.4% (2016), respectively (**Supplementary Table 2**). Both  
25 males and females demonstrated continuously increasing NAFLD prevalence (**Supplementary**  
26 **Table 2**). Compared to females, male Chinese demonstrated significantly higher NAFLD  
27 prevalence, e.g., in 2006, the prevalence of NAFLD in males and females was 20.5% and 9.8%,  
28 respectively. Eleven years later, the prevalence had increased to 37% in males and 22.2% in  
29 females (**Supplementary Table 2**). Noteworthy, the prevalence of NAFLD in male and female  
30 was correlating with age. The peak prevalence of NAFLD in men emerged in those aged  
31 between 40 and 60 years. In 2006, the prevalence of NAFLD in men aged between 40 - 50 and  
32 50 - 60 years was 24.2% and 24.6%, respectively. In 2016, prevalence reached 42.8% and  
33 46.6% (**Supplementary Table 2**) for men. Distinct from males, the peak NAFLD prevalence  
34 in females emerged at an age above 60 years. In 2006, the prevalence of NAFLD in women  
35 older than 60 and 70 years was 25.6% and 22.9%, respectively. Eleven years later, these values  
36 had increased to 53.4% and 30.9% (**Supplementary Table 2**).

51  
52 Among the observed population, 5606 persons received annual health examinations for 11  
53 years, and thus prevalence of NAFLD was analyzed in these individuals. As shown in **Table 1**,  
54 the prevalence of NAFLD increased from 17% in 2006 to 35.2% in 2016. The highest  
55 prevalence rates for NAFLD in 3795 men emerged in those older than 40 years. In 2006, the  
56 NAFLD prevalence in males aged between 40 - 50, 50 - 60, and 60 - 70 years was 24.2%,  
57 25.4% and 19.8%, respectively. In 2016, these values reached 43.3%, 46.8% and 42.3% (**Table**  
58  
59  
60

1  
2  
3 1). Different from males, the peak NAFLD prevalence in 1811 females emerged at an age of  
4 more than 60 years. In 2006, the prevalence of NAFLD in women older than 60 or 70 years  
5 was 22.1% and 28%, respectively. Eleven years later, these values had increased to 31.8% and  
6 28.6% (**Table 1**).  
7  
8  
9

### 10 *BMI and NAFLD incidence*

11  
12 Given the tight link between obesity and NAFLD, we paid special attention to the population  
13 with high BMI. We focused on the 5606 persons with complete follow-up and analyzed the  
14 prevalence of NAFLD in those with BMI >25. In total, out of the 5606 persons, 2445 presented  
15 with a BMI of >25. The prevalence of NAFLD in this overweighted population was far higher  
16 than in the general population. In 2006, 45.2% of individuals (n=1104; male vs. female: 47.3%  
17 vs. 37.1%) with BMI >25 were suffering from NAFLD (**Supplementary Table 3**). In 2016,  
18 values reached 67.1% (n=1414; male vs. female: 69% vs. 59.2%, **Supplementary Table 3**).  
19 Impressively, the NAFLD prevalence in both genders was very high at any age, even in those  
20 below the age of 30 years. In 2006, among 213 overweighted men, younger than 30 years,  
21 52.6% were also diagnosed for NAFLD (**Supplementary Table 3**). This number increased to  
22 63% in 2016 (**Supplementary Table 3**). In 15 (in 2006) and 16 (in 2016) overweighted women  
23 aged less than 30 years, the NAFLD prevalence was 20% and 43.8%, respectively  
24 (**Supplementary Table 3**). In those older than 40 years, NAFLD prevalence increased from  
25 36.6 – 45.4% in 2006 to 53 – 65.6% (**Supplementary Table 3**).  
26  
27  
28  
29  
30  
31  
32  
33  
34  
35  
36  
37  
38

### 39 *Risk factors relevant to NAFLD occurrence*

40  
41 Next, we analyzed risk factors relevant to NAFLD occurrence. Logistic regression analysis was  
42 performed on 26 parameters, including gender, age, BMI, albumin, white globulin ratio (WGR),  
43 white blood cell count (WBC), low density lipoprotein (LDL), triglycerides (TG), high density  
44 lipoprotein (HDL), glutamyl transpeptidase (GLT), alanine transaminase (ALT), aspartate  
45 transaminase (AST), creatinine (Cr), alkaline phosphatase (ALP), blood urea nitrogen (Bun),  
46 uric acid (UA), blood glucose (Glu), systolic blood pressure (SBp), diastolic blood pressure  
47 (DBp), Blood sedimentation (ESR), hemoglobin (HGB), platelets (PLT), Apolipoprotein A1  
48 (ApoA1), Apolipoprotein B2 (ApoB), total bilirubin (TB), total protein (TP). We performed  
49 variable selection by penalized Logistic regression using R package glmnet. Cross validation  
50 selected 16 variables as potential predictors. These were BMI, albumin, WBC, TG, HDL, GLT,  
51 ALT, Cr, UA, Glu, SBp, DBp, ESR, HGB, PLT and ApoB (**Supplementary Table 4**). The  
52 corresponding forest-plot is shown in **Figure 2A**. Among these variables, ApoB and BMI  
53  
54  
55  
56  
57  
58  
59  
60

1  
2  
3 displayed the most robust positive correlation with NAFLD occurrence, while HDL had a  
4 strong negative correlation with NAFLD incidence (**Supplementary Table 4**). The AUC of  
5 these variables for NAFLD is 0.88 (see ROC curve in **Figure 2B**). We further performed a time  
6 dependent Cox regression to calculate the hazard ratios of these parameters for NAFLD  
7 occurrence. Cox regression confirmed that the 16 parameters were significantly relevant to  
8 NAFLD incidence (**Supplementary Table 5** and **Figure 2C**). Furthermore, ApoB and HDL  
9 were the most robust positive and negative risk factors for NAFLD (**Figure 2C**).

### 16 17 *Cause-effect link between risk factors and NAFLD occurrence*

18 Although the aforementioned parameters were regarded as “risk factors” according to statistical  
19 models, it did not necessarily mean that all of them contributed to NAFLD occurrence. Based  
20 on 11 years of longitudinal data, it was possible to construct a dynamic Bayesian network to  
21 identify the risk factors most relevant to NAFLD occurrence. As shown in **Figure 3**, these  
22 parameters constituted a complicated, but clear intercross paradigm. Only three parameters,  
23 BMI, gender and TG directly pointed to NAFLD. In addition, ApoB impacted the incidence of  
24 NAFLD through contributing to TG. Furthermore, LDL can indirectly contribute to NAFLD  
25 through influencing ApoB. Very impressively, the dynamic Bayesian network pointed out that  
26 NAFLD directly leads to alterations of seven parameters: ALT, DBp, SBp, TP, albumin, HGB  
27 and UA. Intriguingly, age, GLT, AST, Cr, and BUN did not interact with any other parameter  
28 in our model, indicating that these factors by incidence correlate, but not any causal interaction  
29 is existing.

### 39 40 41 *Outcome of NAFLD*

42 Subsequently, we examined clinical outcomes of NAFLD over the eleven years. **Table 2**  
43 summarizes the incidence of intra- and extrahepatic diseases of 696 NAFLD and 222 NASH  
44 patients during the follow-up period. Among the total NAFLD and NASH population, only 1  
45 male NAFLD patient developed liver cirrhosis within the eleven years. However, this time span  
46 witnessed significantly increased extrahepatic diseases, including diabetes, hypertension and  
47 hyperuricemia. In the NAFLD population, there were 64 (12.6%) men and 22 (11.6%) women,  
48 191 (37.7%) men and 85 (44.7%) women, 72 (14.2%) men and 43 (22.6%) women who  
49 developed into type II diabetes, hypertension and hyperuricemia, respectively (**Table 2**).

50 Given that 2006 is the starting point of data collection, patients diagnosed for NAFLD in this  
51 year did not mean that their disease had just manifested, but rather patients could have suffered  
52 for more years. To clarify the exact clinical outcomes of NAFLD over one decade, we focused  
53  
54  
55  
56  
57  
58  
59  
60

1  
2  
3 on the following two cohorts of individuals with annual health examinations for 11 years: (1)  
4 patients who were diagnosed as non-NAFLD in 2006, but were NAFLD in 2007 (new NAFLD  
5 cohort); and (2) who were non-NAFLD in both 2006 and 2007 (non-NAFLD cohort). As shown  
6 in **Table 2**, 185 new NAFLD cases (138 men and 47 women) and 4547 non-NAFLD (2786  
7 men and 1761 women) persons were found in 2007. Between 2007 and 2016, neither NAFLD  
8 nor non-NAFLD individuals developed liver cirrhosis or cancer. However, the one-decade  
9 follow-up shows different prevalence of diabetes, hypertension and hyperuricemia. In NAFLD  
10 patients, there were 14 (10.1%) men and 5 (10.6%) women, 47 (34.1%) men and 21 (44.7%)  
11 women, 34 (24.6%) men and 8 (17%) women who developed type II diabetes, hypertension  
12 and hyperuricemia, respectively (**Table 2**). In non-NAFLD individuals, 157 (5.6%) men and  
13 54 (3.4%) women, 259 (9.3%) men and 324 (18.4%), 284 (10.2%) men and 84 women (4.8%)  
14 developed into type II diabetes, hypertension and hyperuricemia, respectively (**Table 2**). For  
15 all three diseases, statistically significant differences were determined between the two cohorts  
16 of population (all  $P < 0.05$ , **Table 2**). These results suggest that diabetes, hypertension and  
17 hyperuricemia are the main clinical outcomes of NAFLD.  
18  
19  
20  
21  
22  
23  
24  
25  
26  
27  
28  
29  
30  
31

## 32 Discussion

33 This eleven-year follow-up retrospective study reports the following: (1) NAFLD prevalence  
34 has substantially increased in the examined Eastern Chinese population. (2) The prevalence of  
35 NAFLD differs by gender and age. Middle-aged men and elderly women are the two  
36 populations at highest risk for NAFLD. (3) Gender, BMI and triglycerides are the parameters  
37 directly associated with NAFLD occurrence. Regardless of gender and age, persons with high  
38 BMI ( $\geq 25$ ) have a high risk for NAFLD development. (4) NAFLD directly leads to alterations  
39 of seven clinical parameters: ALT, DBp, SBp, TP, albumin, HGB and UA. (5) Within 11 years,  
40 a significant part of the NAFLD population develops three clinically relevant diseases: type 2  
41 diabetes mellitus, hypertension and hyperuricemia. (6) Within 11 years, NAFLD does not cause  
42 severe liver disease, such as cirrhosis or HCC, in patients.  
43  
44  
45  
46  
47  
48  
49  
50  
51

52 The most impressive observation of the current study is that among 918 diseased persons (696  
53 NAFLD and 222 NASH), no patient progressed towards HCC and only 1 male NAFLD patient  
54 developed liver cirrhosis within the 11 years. Furthermore, among 185 new NAFLD cases  
55 diagnosed in 2007, none developed liver cirrhosis or liver cancer. Liver cirrhosis and HCC are  
56 commonly regarded as the most severe and costly clinical outcomes of NAFLD [9]. In USA and  
57 Europe, it is estimated that 10-15% of NAFLD patients develop advanced fibrosis [10]. In China,  
58  
59  
60

1  
2  
3 a study with biopsy-proven NAFLD revealed 1.97%-2.97% cirrhosis prevalence [11]. In  
4 addition, NAFLD is regarded as the third-most common cause of cancer-related death  
5 worldwide [12]. In a study based on 4949 US patients with HCC, 701 patients had NAFLD [13].  
6  
7 It was estimated that the cumulative incidence of HCC among patients with NAFLD and  
8 cirrhosis ranges from 2.4% to 12.8% over a median follow-up period of 3.2 to 7.2 years [14]  
9  
10 (Global Health Observatory) data. Mortality and global health estimates were obtained from:  
11 [http://www.who.int/gho/mortality\\_burden\\_disease/en/](http://www.who.int/gho/mortality_burden_disease/en/). Last accessed on 1/7/2020.). Given that  
12 the above conclusions were based on cross-sectional investigations and statistical models, it has  
13 been unknown to date over which period a NAFLD patient develops liver cirrhosis or HCC  
14 (personal risk assessment). Our 11-year follow-up provides therefore a valuable and  
15 comprehensive dataset. In this study, most patients were diagnosed with NAFLD when they  
16 received a routine health examination. Before the examination, these people did not have any  
17 symptoms or signs of NAFLD. Therefore, they belong to NAFLD patients at a very early stage  
18 (although for 2006, the duration of pre-existing NAFLD cannot be determined). Except for a  
19 single person, no serious liver problems were observed within this time period. These data  
20 suggest that for the vast majority of patients with early stage NAFLD, 11 years are not sufficient  
21 to develop liver cirrhosis or cancer. Nasr et al followed up 129 NAFLD patients with varying  
22 fibrosis stages on two occasions (mean time 13.7 and 9.3 years). Liver biopsy analyses showed  
23 that 9.3% of patients developed end-stage liver disease and 34% advanced fibrosis [15]. The  
24 NAFLD patients observed by Nasr et al. actually belonged to the NASH category, because they  
25 suffered from fibrosis and elevated ALT and/or AST levels. As a study based on healthy  
26 examination, liver biopsy is impossible for such a study. Very likely, the current cohort included  
27 a portion of NASH patients. They also did not show significant progression towards cirrhosis  
28 or HCC was monitored.

29  
30  
31  
32  
33  
34  
35  
36  
37  
38  
39  
40  
41  
42  
43  
44  
45  
46 In contrast to hepatic complications, patients with NAFLD showed a significant risk for the  
47 development of extrahepatic diseases, including diabetes, hypertension and hyperuricemia. In  
48 696 NAFLD patients, eleven years witnessed the development of 86 cases (12.4%) type II  
49 diabetes, 276 (40%) cases of hypertension and 115 patients with (16.5%) hyperuricemia,  
50 respectively. Interestingly, in 222 NASH patients, the prevalence of these three diseases was  
51 12 (5.4%), 46 (20.7%), and 33 (14.9%) only. In general, men had a higher probability to develop  
52 these diseases than women. These results are consistent with previous reports from USA and  
53 Europe [16-18].  
54  
55  
56  
57  
58  
59  
60

1  
2  
3 To date, there are a large number of studies investigating risk factors for NAFLD [19]. These  
4 studies tried to identify single, or multiple combined biomarkers to predict NAFLD occurrence.  
5 Given that most studies were based on cross-sectional designs, or with only short follow-up  
6 periods, it is difficult to clarify the causality between the proposed predictors and NAFLD  
7 morbidity. Our eleven-year dataset provides a chance to shed led on this issue. Here, the  
8 dynamic causal relationships between variables, including risk parameters and clinical  
9 outcomes, were identified by a first order Markov model, which was displayed by a dynamic  
10 Bayes network. The dynamic Bayes model discriminates causal relationship through time  
11 sequence. When a variable change is closely related to a previous variance alteration, a causal  
12 relationship between the two variables is assumed. Based on Logistic and Cox regression and  
13 dynamic Bayesian network analyses, we confirmed three direct risk factors for NAFLD  
14 occurrence: gender, BMI and TG. These findings are supported by the following data: (1) Men  
15 have higher NAFLD prevalence than women in this population (37% *versus* 22.2% in 2016);  
16 (2) In overweighted people with a BMI >25, NAFLD prevalence reached 69% in males and  
17 59.2% in females. Given that triglycerides are a major energy source, but are leading to obesity,  
18 it is not surprising that this parameter directly reflects the risk for NAFLD development. These  
19 findings provide robust evidence supporting the use of BMI to monitor or predict NAFLD.  
20  
21  
22  
23  
24  
25  
26  
27  
28  
29  
30  
31  
32  
33  
34  
35

## 36 **Conclusion**

37 This 11-year follow-up study documents the rapid increase in NAFLD prevalence in an Eastern  
38 Chinese population. In contrast to previous reports, our observation does not observe that one  
39 decade of NAFLD is sufficient to lead to severe hepatic clinical outcomes. It is worthy to note  
40 that our population was biased towards physically fit and active people in full employment,  
41 while previous studies were often based on hospital populations, who suffered from negative  
42 selection bias and thus came up with higher estimates. In addition, given there are differences  
43 in NAFLD profiles between Eastern and Western populations, it would be interesting to know  
44 the natural development of NAFLD in a Western population. A key point for clarifying the true  
45 history of NAFLD is to follow a population starting from the early phases of the disease.  
46 Consistent with previous studies, NAFLD does indeed induce multiple extra-hepatic diseases  
47 relevant to the metabolic syndrome. In the future, follow-up of the current cohort for another  
48 one and two decades will provide further valuable data to clarify the extended natural history  
49 of NAFLD. Last but not least, a large portion of the men and women in this study were educated  
50 above the average and have a position in the company that gave them the availability of better  
51  
52  
53  
54  
55  
56  
57  
58  
59  
60

1  
2  
3 food choices as well as regular sport. On the other hand, the relatively low sensitivity of  
4 ultrasound for the detection of liver fat might underestimate the incidence of NAFLD in this  
5 cohort.  
6  
7  
8  
9  
10

## 11 **References**

- 12  
13  
14 [1] Younossi ZM, Tampi R, Priyadarshini M, et al. Burden of Illness and Economic Model  
15 for Patients With Nonalcoholic Steatohepatitis in the United States. *Hepatology*, 2019,  
16 69: 564-572.  
17  
18 [2] Younossi ZM, Loomba R, Anstee QM, et al. Diagnostic modalities for nonalcoholic  
19 fatty liver disease, nonalcoholic steatohepatitis, and associated fibrosis. *Hepatology*,  
20 2018, 68: 349-360.  
21  
22 [3] Fan JG, Kim SU, Wong VW. New trends on obesity and NAFLD in Asia. *J Hepatol*,  
23 2017, 67: 862-873.  
24  
25 [4] Byrne CD, Targher G. NAFLD: a multisystem disease. *J Hepatol*, 2015, 62: S47-64.  
26  
27 [5] Alexander M, Loomis AK, van der Lei J, et al. Risks and clinical predictors of cirrhosis  
28 and hepatocellular carcinoma diagnoses in adults with diagnosed NAFLD: real-world  
29 study of 18 million patients in four European cohorts. *BMC Med*, 2019, 17: 95.  
30  
31 [6] Zhou F, Zhou J, Wang W, et al. Unexpected Rapid Increase in the Burden of NAFLD  
32 in China From 2008 to 2018: A Systematic Review and Meta-Analysis. *Hepatology*,  
33 2019, 70: 1119-1133.  
34  
35 [7] EASL-EASD-EASO Clinical Practice Guidelines for the management of non-alcoholic  
36 fatty liver disease. *J Hepatol*, 2016, 64: 1388-1402.  
37  
38 [8] Chalasani N, Younossi Z, Lavine JE, et al. The diagnosis and management of  
39 nonalcoholic fatty liver disease: Practice guidance from the American Association for  
40 the Study of Liver Diseases. *Hepatology*, 2018, 67: 328-357.  
41  
42 [9] Younossi Z, Tacke F, Arrese M, et al. Global Perspectives on Nonalcoholic Fatty Liver  
43 Disease and Nonalcoholic Steatohepatitis. *Hepatology*, 2019, 69: 2672-2682.  
44  
45 [10] Younossi ZM, Koenig AB, Abdelatif D, et al. Global epidemiology of nonalcoholic  
46 fatty liver disease-Meta-analytic assessment of prevalence, incidence, and outcomes.  
47 *Hepatology*, 2016, 64: 73-84.  
48  
49 [11] Shen F, Zheng RD, Shi JP, et al. Impact of skin capsular distance on the performance  
50 of controlled attenuation parameter in patients with chronic liver disease. *Liver Int*,  
51 2015, 35: 2392-2400.  
52  
53 [12] Ascha MS, Hanouneh IA, Lopez R, et al. The incidence and risk factors of  
54 hepatocellular carcinoma in patients with nonalcoholic steatohepatitis. *Hepatology*,  
55 2010, 51: 1972-1978.  
56  
57 [13] Younossi ZM, Otgonsuren M, Henry L, et al. Association of nonalcoholic fatty liver  
58 disease (NAFLD) with hepatocellular carcinoma (HCC) in the United States from 2004  
59 to 2009. *Hepatology*, 2015, 62: 1723-1730.  
60



- 1  
2  
3  
4 [14] White DL, Kanwal F, El-Serag HB. Association between nonalcoholic fatty liver  
5 disease and risk for hepatocellular cancer, based on systematic review. Clin  
6 Gastroenterol Hepatol, 2012, 10: 1342-1359.e1342.  
7  
8 [15] Nasr P, Ignatova S, Kechagias S, et al. Natural history of nonalcoholic fatty liver  
9 disease: A prospective follow-up study with serial biopsies. Hepatol Commun, 2018, 2:  
10 199-210.  
11  
12 [16] Estes C, Razavi H, Loomba R, et al. Modeling the epidemic of nonalcoholic fatty liver  
13 disease demonstrates an exponential increase in burden of disease. Hepatology, 2018,  
14 67: 123-133.  
15  
16 [17] Williamson RM, Price JF, Glancy S, et al. Prevalence of and risk factors for hepatic  
17 steatosis and nonalcoholic Fatty liver disease in people with type 2 diabetes: the  
18 Edinburgh Type 2 Diabetes Study. Diabetes Care, 2011, 34: 1139-1144.  
19  
20 [18] Targher G, Bertolini L, Padovani R, et al. Prevalence of nonalcoholic fatty liver disease  
21 and its association with cardiovascular disease among type 2 diabetic patients. Diabetes  
22 Care, 2007, 30: 1212-1218.  
23  
24 [19] Miyake T, Kumagi T, Furukawa S, et al. Non-alcoholic fatty liver disease: factors  
25 associated with its presence and onset. J Gastroenterol Hepatol, 2013, 28 Suppl 4: 71-  
26 78.  
27  
28  
29  
30

### 31 **Figure legends**

32 **Figure 1.** Flow chart depicting the enrollment of a population with non-alcoholic fatty liver  
33 disease (NAFLD) for follow-up in Ningbo Zhenhai Lianhua Hospital, China.  
34  
35  
36

37 **Figure 2.** Penalized logistic regression and Cox regression analysis were performed for risk  
38 factors and hazard ratios of non-alcoholic fatty liver disease (NAFLD). The following  
39 parameters were available from 5606 participants: Gender, age, BMI, albumin, white globulin  
40 ratio (WGR), white blood cell (WBC), low density lipoprotein (LDL), triglycerides (TG), high  
41 density lipoprotein (HDL), glutamyl transpeptidase (GLT), alanine transaminase (ALT),  
42 aspartate transaminase (AST), creatinine (Cr), alkaline phosphatase (ALP), blood urea nitrogen  
43 (Bun), Uric Acid (UA), blood glucose (Glu), systolic blood pressure (SBp), diastolic blood  
44 pressure (DBp), blood sedimentation (ESR), hemoglobin (HGB), platelets (PLT),  
45 Apolipoprotein A1 (ApoA1), Apolipoprotein B2 (ApoB), total bilirubin (TB), total protein  
46 (TP). Cross validation selected 16 variables to be potential predictors. The corresponding  
47 forest-plot is shown in (A). The AUC of these above 16 variables for NAFLD is 0.88 (B). Cox  
48 regression confirmed that the 16 variables were relevant for NAFLD incidence, including BMI,  
49 albumin, WBC, TG, HDL, GLT, ALT, Cr, UA, Glu, SBp, DBp, ESR, HGB, PLT and ApoB.  
50 The corresponding forest-plot is shown (C).  
51  
52  
53  
54  
55  
56  
57  
58  
59  
60

1  
2  
3  
4  
5 **Figure 3.** Dynamic Bayesian network analyses were performed to show the cause-effect link  
6 between non-alcoholic fatty liver disease (NAFLD) and its potential risk factors. Three  
7 variables, BMI, gender and triglycerides directly pointed to NAFLD. ApoB impacted on the  
8 incidence of NAFLD through TG abundance. LDL indirectly contributed to NAFLD through  
9 ApoB. NAFLD directly led to alterations of seven clinical parameters: ALT, DBp, SBp, TP,  
10 albumin, HGB and UA.  
11  
12  
13  
14  
15  
16  
17  
18  
19  
20  
21  
22  
23  
24  
25  
26  
27  
28  
29  
30  
31  
32  
33  
34  
35  
36  
37  
38  
39  
40  
41  
42  
43  
44  
45  
46  
47  
48  
49  
50  
51  
52  
53  
54  
55  
56  
57  
58  
59  
60

**Table 1.** Prevalence of NAFLD in 5606 persons with 11-year follow-up (2006-2016)

|                  | 2006 | 2007 | 2008 | 2009 | 2010 | 2011 | 2012 | 2013 | 2014 | 2015 | 2016 |
|------------------|------|------|------|------|------|------|------|------|------|------|------|
| <b>Total (n)</b> | 5606 | 5606 | 5606 | 5606 | 5606 | 5606 | 5606 | 5606 | 5606 | 5606 | 5606 |
| NAFLD            |      |      |      |      |      |      |      |      |      |      |      |
| (n)              | 951  | 1068 | 1247 | 1322 | 1378 | 1466 | 1524 | 1574 | 1700 | 1883 | 1976 |
| (%)              | 17   | 19.1 | 22.2 | 23.6 | 24.6 | 26.2 | 27.2 | 28.1 | 30.3 | 33.6 | 35.2 |
| <b>Male (n)</b>  | 3795 | 3795 | 3795 | 3795 | 3795 | 3795 | 3795 | 3795 | 3795 | 3795 | 3795 |
| NAFLD            |      |      |      |      |      |      |      |      |      |      |      |
| (n)              | 776  | 871  | 1014 | 1075 | 1117 | 1206 | 1244 | 1283 | 1387 | 1517 | 1569 |
| (%)              | 20.4 | 23   | 26.7 | 28.3 | 29.4 | 31.8 | 32.8 | 33.8 | 36.5 | 40   | 41.3 |
| ≤ 30ys           |      |      |      |      |      |      |      |      |      |      |      |
| (n)              | 668  | 466  | 366  | 297  | 246  | 204  | 142  | 67   | 14   | 4    | 0    |
| NAFLD            |      |      |      |      |      |      |      |      |      |      |      |
| (n)              | 97   | 71   | 57   | 46   | 35   | 35   | 30   | 17   | 3    | 1    | 0    |
| (%)              | 14.5 | 15.2 | 15.6 | 15.5 | 14.2 | 17.2 | 21.1 | 25.4 | 21.4 | 25   | 0    |
| >30, ≤           |      |      |      |      |      |      |      |      |      |      |      |
| 40ys (n)         | 1212 | 1315 | 1342 | 1258 | 1180 | 1091 | 1034 | 981  | 896  | 778  | 668  |
| NAFLD            |      |      |      |      |      |      |      |      |      |      |      |
| (n)              | 231  | 286  | 349  | 349  | 338  | 330  | 330  | 331  | 331  | 301  | 261  |
| (%)              | 19.1 | 21.7 | 26   | 27.7 | 28.6 | 30.2 | 31.9 | 33.7 | 36.9 | 38.7 | 39.1 |
| >40, ≤           |      |      |      |      |      |      |      |      |      |      |      |
| 50ys (n)         | 873  | 863  | 842  | 928  | 988  | 1022 | 1097 | 1128 | 1170 | 1201 | 1212 |
| NAFLD            |      |      |      |      |      |      |      |      |      |      |      |
| (n)              | 211  | 215  | 239  | 278  | 314  | 353  | 388  | 411  | 454  | 524  | 525  |
| (%)              | 24.2 | 24.9 | 28.4 | 30   | 31.8 | 34.5 | 35.4 | 36.4 | 38.8 | 43.6 | 43.3 |
| >50, ≤           |      |      |      |      |      |      |      |      |      |      |      |
| 60ys (n)         | 562  | 623  | 696  | 741  | 776  | 826  | 796  | 798  | 820  | 851  | 873  |
| NAFLD            |      |      |      |      |      |      |      |      |      |      |      |
| (n)              | 143  | 184  | 231  | 262  | 276  | 314  | 292  | 286  | 320  | 363  | 409  |
| (%)              | 25.4 | 29.5 | 33.2 | 35.4 | 35.6 | 38   | 36.7 | 35.8 | 39   | 42.7 | 46.8 |
| >60, ≤           |      |      |      |      |      |      |      |      |      |      |      |
| 70ys (n)         | 368  | 382  | 373  | 348  | 346  | 356  | 398  | 465  | 496  | 521  | 562  |
| NAFLD            |      |      |      |      |      |      |      |      |      |      |      |
| (n)              | 73   | 85   | 97   | 95   | 96   | 108  | 125  | 156  | 178  | 210  | 238  |
| (%)              | 19.8 | 22.3 | 26   | 27.3 | 27.7 | 30.3 | 31.4 | 33.5 | 35.9 | 40.3 | 42.3 |
| >70ys            |      |      |      |      |      |      |      |      |      |      |      |
| (n)              | 112  | 146  | 176  | 223  | 259  | 296  | 328  | 356  | 399  | 440  | 480  |
| NAFLD            |      |      |      |      |      |      |      |      |      |      |      |
| (n)              | 21   | 30   | 41   | 45   | 58   | 66   | 79   | 82   | 101  | 118  | 136  |
| (%)              | 18.8 | 20.5 | 23.3 | 20.2 | 22.4 | 22.3 | 24.1 | 23   | 25.3 | 26.8 | 28.3 |
| <b>Female</b>    |      |      |      |      |      |      |      |      |      |      |      |
| (n)              | 1811 | 1811 | 1811 | 1811 | 1811 | 1811 | 1811 | 1811 | 1811 | 1811 | 1811 |
| NAFLD            |      |      |      |      |      |      |      |      |      |      |      |
| (n)              | 175  | 197  | 233  | 247  | 261  | 260  | 280  | 291  | 313  | 366  | 407  |
| (%)              | 9.7  | 10.9 | 12.9 | 13.6 | 14.4 | 14.4 | 15.5 | 16.1 | 17.3 | 20.2 | 22.5 |
| ≤ 30ys           |      |      |      |      |      |      |      |      |      |      |      |
| (n)              | 85   | 44   | 22   | 13   | 9    | 9    | 5    | 2    | 0    | 0    | 0    |
| NAFLD            |      |      |      |      |      |      |      |      |      |      |      |
| (n)              | 3    | 1    | 1    | 1    | 0    | 0    | 0    | 0    | 0    | 0    | 0    |
| (%)              | 3.5  | 2.3  | 4.5  | 7.7  | 0    | 0    | 0    | 0    | 0    | 0    | 0    |
| >30, ≤           |      |      |      |      |      |      |      |      |      |      |      |
| 40ys (n)         | 582  | 578  | 541  | 480  | 403  | 334  | 277  | 213  | 173  | 124  | 85   |
| NAFLD            |      |      |      |      |      |      |      |      |      |      |      |
| (n)              | 17   | 21   | 25   | 22   | 24   | 18   | 18   | 13   | 15   | 14   | 12   |
| (%)              | 2.9  | 3.6  | 4.6  | 4.6  | 6    | 5.4  | 6.5  | 6.1  | 8.7  | 11.3 | 14.1 |
| >40, ≤           |      |      |      |      |      |      |      |      |      |      |      |
| 50ys (n)         | 485  | 469  | 482  | 496  | 541  | 580  | 612  | 638  | 617  | 608  | 582  |
| NAFLD            |      |      |      |      |      |      |      |      |      |      |      |
| (n)              | 31   | 31   | 35   | 41   | 47   | 54   | 61   | 66   | 65   | 81   | 86   |
| (%)              | 6.4  | 6.6  | 7.3  | 8.3  | 8.7  | 9.3  | 10   | 10.3 | 10.5 | 13.3 | 14.8 |
| >50, ≤           |      |      |      |      |      |      |      |      |      |      |      |
| 60ys (n)         | 365  | 400  | 422  | 450  | 461  | 469  | 456  | 452  | 467  | 476  | 485  |
| NAFLD            |      |      |      |      |      |      |      |      |      |      |      |
| (n)              | 56   | 67   | 85   | 86   | 90   | 88   | 88   | 83   | 88   | 98   | 109  |
| (%)              | 15.3 | 16.8 | 20.1 | 19.1 | 19.5 | 18.8 | 19.3 | 18.4 | 18.8 | 20.6 | 22.5 |
| >60, ≤           |      |      |      |      |      |      |      |      |      |      |      |
| 70ys (n)         | 244  | 260  | 262  | 267  | 266  | 266  | 280  | 301  | 314  | 337  | 365  |
| NAFLD            |      |      |      |      |      |      |      |      |      |      |      |
| (n)              | 54   | 62   | 61   | 66   | 69   | 66   | 70   | 81   | 82   | 104  | 116  |
| (%)              | 22.1 | 23.8 | 23.3 | 24.7 | 25.9 | 24.8 | 25   | 26.9 | 26.1 | 30.9 | 31.8 |
| >70ys (n)        | 50   | 60   | 82   | 105  | 131  | 153  | 181  | 205  | 240  | 266  | 294  |
| NAFLD            |      |      |      |      |      |      |      |      |      |      |      |
| (n)              | 14   | 15   | 26   | 31   | 31   | 34   | 43   | 48   | 63   | 69   | 84   |
| (%)              | 28   | 25   | 31.7 | 29.5 | 23.7 | 22.2 | 23.8 | 23.4 | 26.3 | 25.9 | 28.6 |

**Table 2.** Clinical outcome of NAFLD patients  
2006 - 2016

|                                           |                         | Cirrhosis | HCC | Diabetes<br>n (%) |         | Hypertension<br>n (%) |         | Hyperuricemia<br>n (%) |         |
|-------------------------------------------|-------------------------|-----------|-----|-------------------|---------|-----------------------|---------|------------------------|---------|
| Male<br>(n=506)                           |                         | 0         | 0   | 64 (12.6)         |         | 191 (37.7)            |         | 72 (14.2)              |         |
| Female (n=190)                            |                         | 0         | 0   | 22 (11.6)         |         | 85 (44.7)             |         | 43 (22.6)              |         |
| <b>2007 – 2016 (outcome of new NFLAD)</b> |                         |           |     |                   |         |                       |         |                        |         |
|                                           |                         | Cirrhosis | HCC | Diabetes          |         | Hypertension          |         | Hyperuricemia          |         |
|                                           |                         |           |     | n (%)             | P-value | n (%)                 | P-value | n (%)                  | P-value |
| Male                                      | NAFLD<br>n=138          | 0         | 0   | 14<br>(10.1)      | 0.028   | 47(34.1)              | < 0.001 | 34 (24.6)              | < 0.001 |
|                                           | Non-<br>NAFLD<br>n=2786 | 0         | 0   | 157<br>(5.6)      |         | 259 (9.3)             |         | 284 (10.2)             |         |
| Female                                    | NAFLD<br>n=47           | 0         | 0   | 5 (10.6)          | 0.014   | 21 (44.7)             | < 0.001 | 8 (17)                 | < 0.001 |
|                                           | Non-<br>NAFLD<br>n=1761 | 0         | 0   | 54 (3.1)          |         | 324<br>(18.4)         |         | 84 (4.8)               |         |

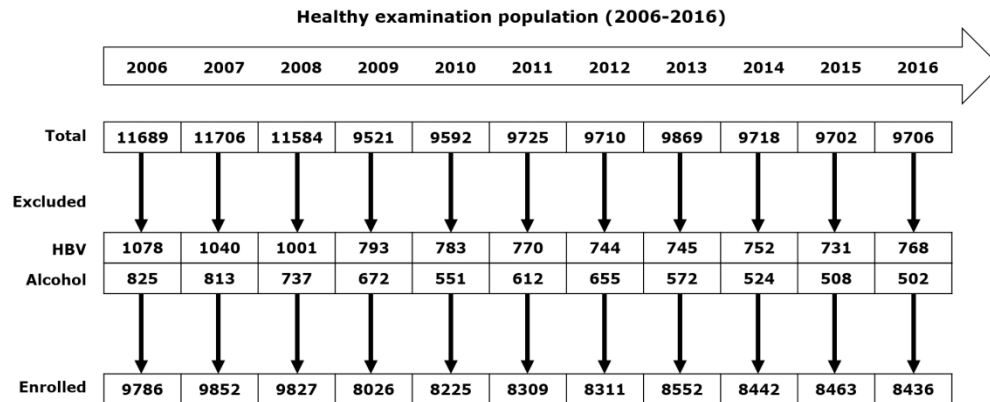

Flow chart depicting the enrollment of a population with non-alcoholic fatty liver disease (NAFLD) for follow-up in Ningbo Zhenhai Lianhua Hospital, China.

335x136mm (150 x 150 DPI)

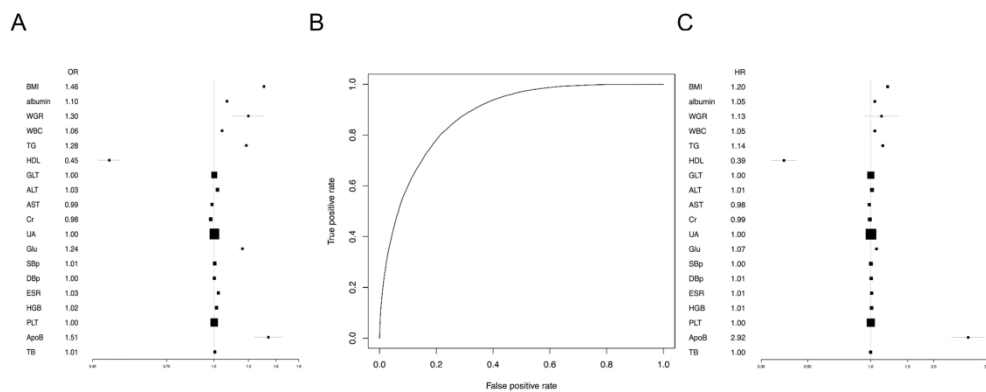

120x59mm (600 x 600 DPI)

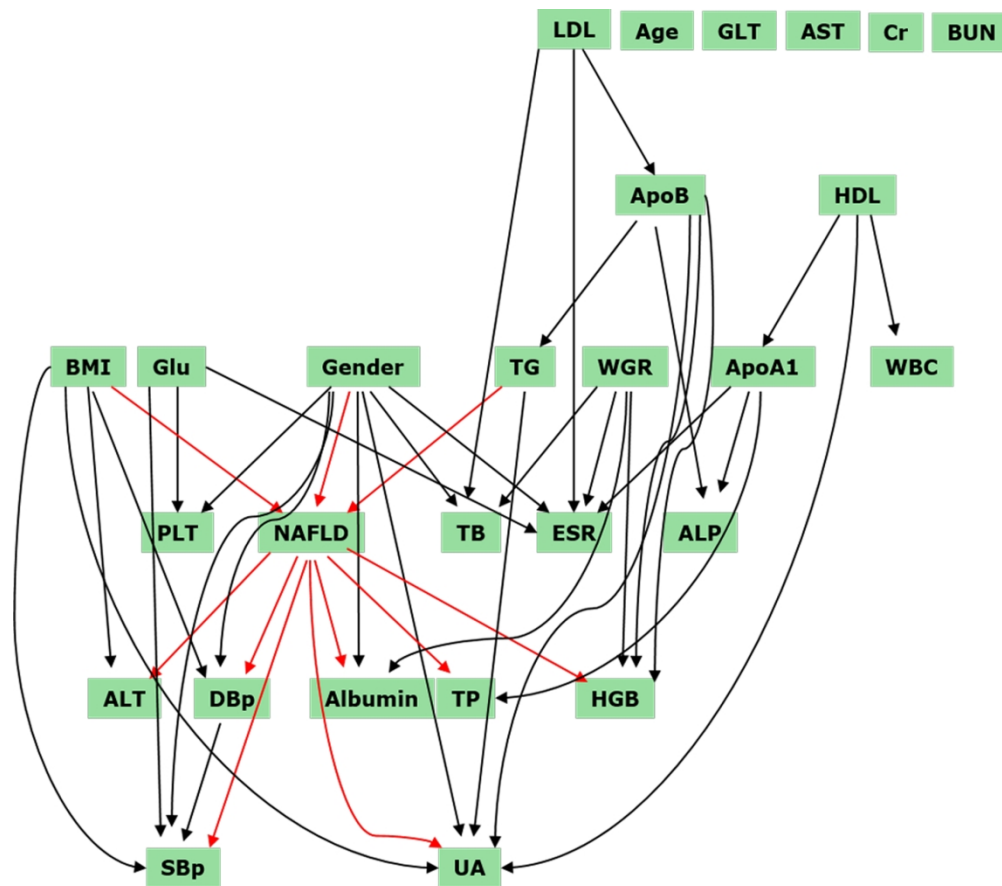

Dynamic Bayesian network analyses were performed to show the cause-effect link between non-alcoholic fatty liver disease (NAFLD) and its potential risk factors. Three variables, BMI, gender and triglycerides directly pointed to NAFLD. ApoB impacted on the incidence of NAFLD through TG abundance. LDL indirectly contributed to NAFLD through ApoB. NAFLD directly led to alterations of seven clinical parameters: ALT, DBp, SBp, TP, albumin, HGB and UA.

522x461mm (96 x 96 DPI)

1  
2  
3 **Nonalcoholic fatty liver disease increased risk of metabolic diseases, but not severe liver**  
4 **disease: an eleven-year follow-up study**  
5

6 Xiaoping Tang, Yanyan Shi, Juan Du, Keming Hu, Tingting Zhou, Lan Chen, Yanming  
7 Zhang, Fujun Li, Huier Zhang, Roman Liebe, Christoph Meyer, Steven Dooley, Zhongwei  
8 Zhu, Hong-Lei Weng, Jinzhu Jia, Tong Huang  
9  
10  
11  
12  
13  
14  
15  
16  
17  
18  
19  
20  
21  
22  
23  
24  
25  
26  
27  
28  
29  
30  
31  
32  
33  
34  
35  
36  
37  
38  
39  
40  
41  
42  
43  
44  
45  
46  
47  
48  
49  
50  
51  
52  
53  
54  
55  
56  
57  
58  
59  
60

For peer review only



**Supplementary Table 1.** Parameters measured in the annual health examinations.

|                                                 |
|-------------------------------------------------|
| Age                                             |
| Albumin                                         |
| AKP (alkaline phosphatase)                      |
| ALT ( alanine transaminase)                     |
| ApoA1 (Apolipoprotein A1)                       |
| ApoB (Apolipoprotein B2)                        |
| AST (aspartate transaminase)                    |
| BMI (Body mass index)                           |
| BLRV (whole blood low shear reduced viscosity)  |
| BLRI (relative index of whole blood low shear)  |
| BHRV (whole blood high shear reduced viscosity) |
| BHRI (relative index of whole blood high shear) |
| BVV200 (Whole blood viscosity value)            |
| BUN (blood urea nitrogen)                       |
| BUS (ultrasound prompt)                         |
| CRP (high sensitive C-reactive protein)         |
| Cr (creatinine)                                 |
| CA (carotid atherosclerosis )                   |
| DBIL (Direct bilirubin)                         |
| DBp (diastolic blood pressure)                  |
| DM (type II diabetes)                           |
| ESR (Blood sedimentation)                       |
| ESRKV (Blood sedimentation equation K value)    |
| Gender                                          |
| GLT (glutamyl transpeptidase)                   |
| Glucose                                         |
| HBP (Hypertension)                              |
| HBX (red blood cell deformation index TK)       |
| HCT (Hematocrit)                                |
| HCY (Homocysteine)                              |
| HDL (high density lipoprotein C)                |
| Height                                          |
| HGB (hemoglobin)                                |
| LDL (low density lipoprotein C)                 |
| LVH (left ventricular hypertrophy)              |
| MPV (mean platelet volume)                      |
| NAFLD (non-alcoholic fatty liver disease)       |
| PhyExa (physical examination results)           |
| PV (plasma viscosity)                           |
| PDW (Platelet distribution width)               |
| PLT (platelet)                                  |
| PCT ( prothrombin consumption time)             |
| RBC (red blood cell count)                      |
| SBp (systolic blood pressure)                   |
| TB (Total Bilirubin)                            |
| TC (Total cholesterol)                          |
| TG (Triglyceride)                               |

|    |                              |
|----|------------------------------|
| 1  |                              |
| 2  |                              |
| 3  | TP (total protein)           |
| 4  | UA (uric acid)               |
| 5  | Waist                        |
| 6  | Weight                       |
| 7  | WGR (white globulin ratio)   |
| 8  | WBC (white blood cell count) |
| 9  |                              |
| 10 |                              |
| 11 |                              |
| 12 |                              |
| 13 |                              |
| 14 |                              |
| 15 |                              |
| 16 |                              |
| 17 |                              |
| 18 |                              |
| 19 |                              |
| 20 |                              |
| 21 |                              |
| 22 |                              |
| 23 |                              |
| 24 |                              |
| 25 |                              |
| 26 |                              |
| 27 |                              |
| 28 |                              |
| 29 |                              |
| 30 |                              |
| 31 |                              |
| 32 |                              |
| 33 |                              |
| 34 |                              |
| 35 |                              |
| 36 |                              |
| 37 |                              |
| 38 |                              |
| 39 |                              |
| 40 |                              |
| 41 |                              |
| 42 |                              |
| 43 |                              |
| 44 |                              |
| 45 |                              |
| 46 |                              |
| 47 |                              |
| 48 |                              |
| 49 |                              |
| 50 |                              |
| 51 |                              |
| 52 |                              |
| 53 |                              |
| 54 |                              |
| 55 |                              |
| 56 |                              |
| 57 |                              |
| 58 |                              |
| 59 |                              |
| 60 |                              |

For peer review only

**Supplementary Table 2.** Prevalence of NAFLD in an eastern Chinese population (2006-2016)

|                   | 2006 | 2007 | 2008 | 2009 | 2010 | 2011 | 2012 | 2013 | 2014 | 2015 | 2016 |
|-------------------|------|------|------|------|------|------|------|------|------|------|------|
| <b>Total (n)</b>  | 9786 | 9852 | 9827 | 8026 | 8225 | 8309 | 8311 | 8552 | 8442 | 8463 | 8436 |
| NAFLD (n)         | 1687 | 1875 | 2161 | 1797 | 1871 | 1943 | 2033 | 2169 | 2356 | 2610 | 2734 |
| (%)               | 17.2 | 19.0 | 22.0 | 22.4 | 22.7 | 23.4 | 24.5 | 25.4 | 27.9 | 30.8 | 32.4 |
| <b>Male (n)</b>   | 6834 | 6872 | 6857 | 5468 | 5640 | 5692 | 5680 | 5891 | 5820 | 5812 | 5816 |
| NAFLD (n)         | 1399 | 1555 | 1790 | 1419 | 1488 | 1562 | 1616 | 1734 | 1896 | 2081 | 2152 |
| (%)               | 20.5 | 22.6 | 26.1 | 26.0 | 26.4 | 27.4 | 28.5 | 29.4 | 32.6 | 35.8 | 37.0 |
| ≤ 30ys (n)        | 1196 | 938  | 729  | 826  | 980  | 1092 | 1068 | 1163 | 1013 | 964  | 927  |
| NAFLD (n)         | 155  | 112  | 100  | 78   | 83   | 94   | 108  | 157  | 171  | 208  | 200  |
| (%)               | 13.0 | 11.9 | 13.7 | 9.4  | 8.5  | 8.6  | 10.1 | 13.5 | 16.9 | 21.6 | 21.6 |
| >30, ≤ 40ys (n)   | 2144 | 2292 | 2353 | 1504 | 1395 | 1248 | 1150 | 1096 | 1028 | 970  | 953  |
| NAFLD (n)         | 419  | 502  | 590  | 412  | 386  | 375  | 358  | 367  | 372  | 357  | 344  |
| (%)               | 19.5 | 21.9 | 25.1 | 27.4 | 27.7 | 30.0 | 31.1 | 33.5 | 36.2 | 36.8 | 36.1 |
| >40, ≤ 50ys (n)   | 1480 | 1465 | 1450 | 1107 | 1183 | 1211 | 1279 | 1299 | 1339 | 1360 | 1347 |
| NAFLD (n)         | 358  | 376  | 429  | 334  | 380  | 418  | 456  | 478  | 517  | 595  | 577  |
| (%)               | 24.2 | 25.7 | 29.6 | 30.2 | 32.1 | 34.5 | 35.7 | 36.8 | 38.6 | 43.8 | 42.8 |
| >50, ≤ 60ys (n)   | 1084 | 1180 | 1314 | 1033 | 1055 | 1068 | 1008 | 979  | 978  | 984  | 978  |
| NAFLD (n)         | 267  | 341  | 415  | 352  | 364  | 394  | 361  | 350  | 385  | 416  | 456  |
| (%)               | 24.6 | 28.9 | 31.6 | 34.1 | 34.5 | 36.9 | 35.8 | 35.8 | 39.4 | 42.3 | 46.6 |
| >60, ≤ 70ys (n)   | 635  | 655  | 622  | 553  | 547  | 574  | 632  | 774  | 834  | 879  | 937  |
| NAFLD (n)         | 137  | 147  | 165  | 151  | 159  | 172  | 202  | 243  | 292  | 331  | 382  |
| (%)               | 21.6 | 22.4 | 26.5 | 27.3 | 29.1 | 30.0 | 32.0 | 31.4 | 35.0 | 37.7 | 40.8 |
| >70ys (n)         | 295  | 342  | 389  | 445  | 480  | 499  | 543  | 580  | 628  | 655  | 674  |
| NAFLD (n)         | 63   | 77   | 91   | 92   | 116  | 109  | 131  | 139  | 159  | 174  | 193  |
| (%)               | 21.4 | 22.5 | 23.4 | 20.7 | 24.2 | 21.8 | 24.1 | 24.0 | 25.3 | 26.6 | 28.6 |
| <b>Female (n)</b> | 2952 | 2980 | 2970 | 2558 | 2585 | 2617 | 2631 | 2661 | 2622 | 2651 | 2620 |
| NAFLD (n)         | 288  | 320  | 371  | 378  | 383  | 381  | 417  | 435  | 460  | 529  | 582  |
| (%)               | 9.8  | 10.7 | 12.5 | 14.8 | 14.8 | 14.6 | 15.8 | 16.3 | 17.5 | 20.0 | 22.2 |
| ≤ 30ys (n)        | 209  | 167  | 147  | 143  | 213  | 251  | 248  | 270  | 239  | 244  | 214  |
| NAFLD (n)         | 5    | 4    | 4    | 1    | 0    | 1    | 2    | 8    | 9    | 14   | 13   |
| (%)               | 2.4  | 2.4  | 2.7  | 0.7  | 0.0  | 0.4  | 0.8  | 3.0  | 3.8  | 5.7  | 6.1  |
| >30, ≤ 40ys (n)   | 934  | 924  | 869  | 596  | 496  | 415  | 348  | 276  | 232  | 198  | 177  |
| NAFLD (n)         | 33   | 29   | 36   | 28   | 28   | 24   | 23   | 17   | 19   | 20   | 20   |
| (%)               | 3.5  | 3.1  | 4.1  | 4.7  | 5.6  | 5.8  | 6.6  | 6.2  | 8.2  | 10.1 | 11.3 |
| >40, ≤ 50ys (n)   | 801  | 785  | 776  | 627  | 666  | 701  | 733  | 754  | 707  | 704  | 658  |
| NAFLD (n)         | 54   | 60   | 63   | 62   | 69   | 76   | 85   | 88   | 84   | 98   | 99   |
| (%)               | 6.7  | 7.6  | 8.1  | 9.9  | 10.4 | 10.8 | 11.6 | 11.7 | 11.9 | 13.9 | 15.0 |
| >50, ≤ 60ys (n)   | 536  | 604  | 651  | 643  | 647  | 659  | 641  | 638  | 665  | 680  | 689  |
| NAFLD (n)         | 78   | 100  | 133  | 131  | 132  | 128  | 132  | 132  | 131  | 157  | 171  |
| (%)               | 14.6 | 16.6 | 20.4 | 20.4 | 20.4 | 19.4 | 20.6 | 20.7 | 19.7 | 23.1 | 24.8 |
| >60, ≤ 70ys (n)   | 367  | 368  | 367  | 358  | 347  | 347  | 380  | 417  | 438  | 461  | 494  |
| NAFLD (n)         | 94   | 96   | 92   | 99   | 95   | 92   | 106  | 117  | 123  | 140  | 159  |
| (%)               | 25.6 | 26.1 | 25.1 | 27.7 | 27.4 | 26.5 | 27.9 | 28.1 | 28.1 | 30.4 | 32.2 |
| >70ys (n)         | 105  | 132  | 160  | 191  | 216  | 244  | 281  | 306  | 341  | 364  | 388  |
| NAFLD (n)         | 24   | 31   | 43   | 57   | 59   | 60   | 69   | 73   | 94   | 100  | 120  |
| (%)               | 22.9 | 23.5 | 26.9 | 29.8 | 27.3 | 24.6 | 24.6 | 23.9 | 27.6 | 27.5 | 30.9 |

**Supplementary Table 3.** Prevalence of NAFLD in obese persons (BMI > 25) (2006-2016)

|                   | 2006 | 2007 | 2008 | 2009 | 2010 | 2011 | 2012 | 2013 | 2014 | 2015 | 2016 |
|-------------------|------|------|------|------|------|------|------|------|------|------|------|
| <b>Total (n)</b>  | 2445 | 2674 | 2749 | 2119 | 2314 | 2271 | 2218 | 2593 | 2159 | 2121 | 2106 |
| NAFLD             |      |      |      |      |      |      |      |      |      |      |      |
| (n)               | 1104 | 1256 | 1397 | 1103 | 1231 | 1218 | 1239 | 1387 | 1309 | 1384 | 1414 |
| (%)               | 45.2 | 47   | 50.8 | 52.1 | 53.2 | 53.6 | 55.9 | 53.5 | 60.6 | 65.3 | 67.1 |
| <b>Male (n)</b>   | 1927 | 2163 | 2232 | 1663 | 1822 | 1813 | 1744 | 2086 | 1728 | 1716 | 1699 |
| NAFLD             |      |      |      |      |      |      |      |      |      |      |      |
| (n)               | 912  | 1053 | 1180 | 885  | 1002 | 1001 | 1010 | 1153 | 1086 | 1147 | 1173 |
| (%)               | 47.3 | 48.7 | 52.9 | 53.2 | 55   | 55.2 | 57.9 | 55.3 | 62.8 | 66.8 | 69   |
| ≤ 30ys (n)        | 213  | 202  | 174  | 156  | 190  | 227  | 220  | 293  | 224  | 212  | 200  |
| NAFLD             |      |      |      |      |      |      |      |      |      |      |      |
| (n)               | 112  | 86   | 67   | 53   | 64   | 70   | 79   | 115  | 119  | 132  | 126  |
| (%)               | 52.6 | 42.6 | 38.5 | 34   | 33.7 | 30.8 | 35.9 | 39.2 | 53.1 | 62.3 | 63   |
| >30, ≤ 40ys (n)   | 549  | 640  | 689  | 427  | 428  | 375  | 346  | 407  | 310  | 302  | 291  |
| NAFLD             |      |      |      |      |      |      |      |      |      |      |      |
| (n)               | 269  | 325  | 388  | 259  | 250  | 229  | 226  | 247  | 229  | 211  | 206  |
| (%)               | 49   | 50.8 | 56.3 | 60.7 | 58.4 | 61.1 | 65.3 | 60.7 | 73.9 | 69.9 | 70.8 |
| >40, ≤ 50ys (n)   | 433  | 456  | 468  | 353  | 414  | 423  | 431  | 517  | 443  | 437  | 425  |
| NAFLD             |      |      |      |      |      |      |      |      |      |      |      |
| (n)               | 210  | 225  | 263  | 185  | 248  | 264  | 276  | 321  | 293  | 323  | 310  |
| (%)               | 48.5 | 49.3 | 56.2 | 52.4 | 59.9 | 62.4 | 64   | 62.1 | 66.1 | 73.9 | 72.9 |
| >50, ≤ 60ys (n)   | 351  | 447  | 491  | 364  | 390  | 392  | 353  | 381  | 312  | 309  | 303  |
| NAFLD             |      |      |      |      |      |      |      |      |      |      |      |
| (n)               | 173  | 240  | 280  | 222  | 236  | 247  | 209  | 226  | 207  | 217  | 232  |
| (%)               | 49.3 | 53.7 | 57   | 61   | 60.5 | 63   | 59.2 | 59.3 | 66.3 | 70.2 | 76.6 |
| >60, ≤ 70ys (n)   | 265  | 274  | 249  | 213  | 213  | 209  | 222  | 291  | 263  | 262  | 281  |
| NAFLD             |      |      |      |      |      |      |      |      |      |      |      |
| (n)               | 98   | 111  | 113  | 102  | 113  | 113  | 133  | 155  | 150  | 159  | 189  |
| (%)               | 37   | 40.5 | 45.4 | 47.9 | 53.1 | 54.1 | 59.9 | 53.3 | 57   | 60.7 | 67.3 |
| >70ys (n)         | 116  | 144  | 161  | 150  | 187  | 187  | 172  | 197  | 176  | 194  | 199  |
| NAFLD             |      |      |      |      |      |      |      |      |      |      |      |
| (n)               | 50   | 66   | 69   | 64   | 91   | 78   | 87   | 89   | 88   | 105  | 110  |
| (%)               | 43.1 | 45.8 | 42.9 | 42.7 | 48.7 | 41.7 | 50.6 | 45.2 | 50   | 54.1 | 55.3 |
| <b>Female (n)</b> | 518  | 511  | 517  | 456  | 492  | 458  | 474  | 507  | 431  | 405  | 407  |
| NAFLD             |      |      |      |      |      |      |      |      |      |      |      |
| (n)               | 192  | 203  | 217  | 218  | 229  | 217  | 229  | 234  | 223  | 237  | 241  |
| (%)               | 37.1 | 39.7 | 42   | 47.8 | 46.5 | 47.4 | 48.3 | 46.2 | 51.7 | 58.5 | 59.2 |
| ≤ 30ys (n)        | 15   | 5    | 11   | 9    | 6    | 12   | 13   | 15   | 13   | 14   | 16   |
| NAFLD             |      |      |      |      |      |      |      |      |      |      |      |
| (n)               | 3    | 1    | 2    | 0    | 0    | 1    | 2    | 5    | 5    | 5    | 7    |
| (%)               | 20   | 20   | 18.2 | 0    | 0    | 8.3  | 15.4 | 33.3 | 38.5 | 35.7 | 43.8 |
| >30, ≤ 40ys (n)   | 69   | 78   | 75   | 46   | 50   | 36   | 36   | 31   | 21   | 20   | 18   |
| NAFLD             |      |      |      |      |      |      |      |      |      |      |      |
| (n)               | 20   | 18   | 22   | 18   | 22   | 14   | 17   | 9    | 10   | 11   | 11   |
| (%)               | 29   | 23.1 | 29.3 | 39.1 | 44   | 38.9 | 47.2 | 29   | 47.6 | 55   | 61.1 |
| >40, ≤ 50ys (n)   | 101  | 107  | 109  | 83   | 90   | 88   | 94   | 115  | 89   | 76   | 66   |
| NAFLD             |      |      |      |      |      |      |      |      |      |      |      |
| (n)               | 37   | 41   | 41   | 34   | 36   | 39   | 44   | 48   | 45   | 46   | 35   |
| (%)               | 36.6 | 38.3 | 37.6 | 41   | 40   | 44.3 | 46.8 | 41.7 | 50.6 | 60.5 | 53   |
| >50, ≤ 60ys (n)   | 141  | 146  | 146  | 151  | 155  | 137  | 121  | 125  | 101  | 92   | 93   |
| NAFLD             |      |      |      |      |      |      |      |      |      |      |      |
| (n)               | 49   | 56   | 63   | 72   | 72   | 66   | 56   | 61   | 53   | 62   | 61   |
| (%)               | 34.8 | 38.4 | 43.2 | 47.7 | 46.5 | 48.2 | 46.3 | 48.8 | 52.5 | 67.4 | 65.6 |
| >60, ≤ 70ys (n)   | 141  | 127  | 115  | 103  | 115  | 105  | 120  | 127  | 109  | 105  | 105  |
| NAFLD             |      |      |      |      |      |      |      |      |      |      |      |
| (n)               | 64   | 66   | 58   | 59   | 65   | 59   | 68   | 67   | 57   | 63   | 66   |
| (%)               | 45.4 | 52   | 50.4 | 57.3 | 56.5 | 56.2 | 56.7 | 52.8 | 52.3 | 60   | 62.9 |
| >70ys (n)         | 51   | 48   | 61   | 64   | 76   | 80   | 90   | 94   | 98   | 98   | 109  |
| NAFLD             |      |      |      |      |      |      |      |      |      |      |      |
| (n)               | 19   | 21   | 31   | 35   | 34   | 38   | 42   | 44   | 53   | 50   | 61   |
| (%)               | 37.3 | 43.8 | 50.8 | 54.7 | 44.7 | 47.5 | 46.7 | 46.8 | 54.1 | 51   | 56   |

**Supplementary Table 4.** Logistic regression for risk factors of NAFLD

|             | Estimate | Std. Error | z value | OR       | 2.5%CI   | 97.5%CI  | Pr(> z )   |
|-------------|----------|------------|---------|----------|----------|----------|------------|
| (Intercept) | -21.63   | 0.3151     | -68.631 | 4.05E-10 | 2.18E-10 | 7.49E-10 | < 0.001*** |
| BMI         | 0.3791   | 0.005224   | 72.563  | 1.460966 | 1.446132 | 1.476054 | < 0.001*** |
| albumin     | 0.0994   | 0.005635   | 17.64   | 1.104513 | 1.092391 | 1.116791 | < 0.001*** |
| WGR         | 0.2666   | 0.06118    | 4.357   | 1.305464 | 1.157849 | 1.471676 | < 0.001*** |
| WBC         | 0.06149  | 0.008274   | 7.432   | 1.063423 | 1.046307 | 1.080801 | < 0.001*** |
| TG          | 0.2447   | 0.01213    | 20.17   | 1.277201 | 1.247335 | 1.308081 | < 0.001*** |
| HDL         | -0.7862  | 0.04247    | -18.511 | 0.45558  | 0.419127 | 0.495053 | < 0.001*** |
| GLT         | 0.002947 | 0.000358   | 8.242   | 1.002952 | 1.002255 | 1.003661 | < 0.001*** |
| ALT         | 0.02717  | 0.001056   | 25.738  | 1.027538 | 1.025425 | 1.029676 | < 0.001*** |
| AST         | -0.0142  | 0.001834   | -7.745  | 0.985896 | 0.982336 | 0.989418 | < 0.001*** |
| Cr          | -0.02375 | 0.001025   | -23.177 | 0.976528 | 0.974562 | 0.978485 | < 0.001*** |
| ALP         | 0.000909 | 0.000547   | 1.661   | 1.000909 | 0.999835 | 1.001982 | 0.09664    |
| UA          | 0.00433  | 0.000176   | 24.542  | 1.004339 | 1.003992 | 1.004687 | < 0.001*** |
| Glu         | 0.2159   | 0.01197    | 18.044  | 1.241037 | 1.212327 | 1.270567 | < 0.001*** |
| SBp         | 0.006338 | 0.001014   | 6.252   | 1.006358 | 1.00436  | 1.008359 | < 0.001*** |
| DBp         | 0.003561 | 0.001546   | 2.303   | 1.003567 | 1.000532 | 1.006614 | 0.021265*  |
| ESR         | 0.03401  | 0.001808   | 18.808  | 1.034593 | 1.030931 | 1.038265 | < 0.001*** |
| HGB         | 0.01966  | 0.00121    | 16.252  | 1.019853 | 1.017441 | 1.022277 | < 0.001*** |
| PLT         | 0.002588 | 0.000249   | 10.401  | 1.002592 | 1.002102 | 1.003081 | < 0.001*** |
| ApoB        | 0.4143   | 0.05413    | 7.654   | 1.513337 | 1.361002 | 1.6827   | < 0.001*** |
| TB          | 0.00778  | 0.002057   | 3.782   | 1.00781  | 1.003739 | 1.011865 | < 0.001*** |

**Supplementary Table 5.** Cox regression for risk factors of NAFLD

|         | se(coef) | z value | coef     | HR       | lower .95 | upper .95 | Pr(> z )    |
|---------|----------|---------|----------|----------|-----------|-----------|-------------|
| BMI     | 0.005327 | 35.102  | 0.186996 | 1.205622 | 1.1930993 | 1.2182761 | < 0.001***  |
| Albumin | 0.009655 | 4.656   | 0.04495  | 1.045976 | 1.0263691 | 1.0659575 | < 0.001***  |
| WGR     | 0.096408 | 1.326   | 0.12788  | 1.136417 | 0.9407519 | 1.3727778 | 0.184691    |
| WBC     | 0.010893 | 4.087   | 0.044521 | 1.045527 | 1.0234412 | 1.0680884 | < 0.001***  |
| TG      | 0.011283 | 11.755  | 0.132633 | 1.141831 | 1.1168563 | 1.1673638 | < 0.001***  |
| HDL     | 0.071682 | -13.214 | -0.94719 | 0.387829 | 0.3369955 | 0.4463302 | < 0.001***  |
| GLT     | 0.000494 | 2.601   | 0.001285 | 1.001285 | 1.0003166 | 1.0022553 | 0.009302**  |
| ALT     | 0.001478 | 9.309   | 0.013757 | 1.013853 | 1.0109201 | 1.0167934 | < 0.001***  |
| AST     | 0.003074 | -4.965  | -0.01526 | 0.984853 | 0.978937  | 0.990805  | < 0.001***  |
| Cr      | 0.001677 | -5.609  | -0.00941 | 0.990637 | 0.9873861 | 0.9939885 | < 0.001***  |
| ALP     | 0.000871 | 1.451   | 0.001263 | 1.001264 | 0.9995565 | 1.0029745 | 0.146888    |
| UA      | 0.000277 | 11.14   | 0.003085 | 1.003089 | 1.0025451 | 1.0036338 | < 0.001***  |
| Glu     | 0.016397 | 3.771   | 0.061837 | 1.063788 | 1.0301446 | 1.0985309 | 0.000162*** |
| SBp     | 0.001643 | 1.485   | 0.00244  | 1.002443 | 0.9992205 | 1.0056749 | 0.137485    |
| DBp     | 0.002517 | 2.383   | 0.005996 | 1.006014 | 1.0010643 | 1.0109889 | 0.01719*    |
| ESR     | 0.003054 | 3.429   | 0.010473 | 1.010528 | 1.0044965 | 1.0165956 | 0.000606*** |
| HGB     | 0.002056 | 4.507   | 0.009269 | 1.009312 | 1.0052523 | 1.0133885 | < 0.001***  |
| PLT     | 0.000389 | 3.318   | 0.001291 | 1.001292 | 1.0005286 | 1.0020554 | 0.000905*** |
| ApoB    | 0.092419 | 11.569  | 1.069192 | 2.913026 | 2.4303962 | 3.4914963 | < 0.001***  |
| TB      | 0.003316 | -0.216  | -0.00072 | 0.999283 | 0.9928097 | 1.0057994 | 0.828863    |

## STROBE Statement—checklist of items that should be included in reports of observational studies

|                           | Item No | Recommendation                                                                                                                                                                                                                                                                                                                                                                                                                                                                                                                                                                                                                                                                                   | Page No |
|---------------------------|---------|--------------------------------------------------------------------------------------------------------------------------------------------------------------------------------------------------------------------------------------------------------------------------------------------------------------------------------------------------------------------------------------------------------------------------------------------------------------------------------------------------------------------------------------------------------------------------------------------------------------------------------------------------------------------------------------------------|---------|
| <b>Title and abstract</b> | 1       | (a) Indicate the study's design with a commonly used term in the title or the abstract<br>(b) Provide in the abstract an informative and balanced summary of what was done and what was found                                                                                                                                                                                                                                                                                                                                                                                                                                                                                                    |         |
| <b>Introduction</b>       |         |                                                                                                                                                                                                                                                                                                                                                                                                                                                                                                                                                                                                                                                                                                  |         |
| Background/rationale      | 2       | Explain the scientific background and rationale for the investigation being reported                                                                                                                                                                                                                                                                                                                                                                                                                                                                                                                                                                                                             |         |
| Objectives                | 3       | State specific objectives, including any prespecified hypotheses                                                                                                                                                                                                                                                                                                                                                                                                                                                                                                                                                                                                                                 |         |
| <b>Methods</b>            |         |                                                                                                                                                                                                                                                                                                                                                                                                                                                                                                                                                                                                                                                                                                  |         |
| Study design              | 4       | Present key elements of study design early in the paper                                                                                                                                                                                                                                                                                                                                                                                                                                                                                                                                                                                                                                          |         |
| Setting                   | 5       | Describe the setting, locations, and relevant dates, including periods of recruitment, exposure, follow-up, and data collection                                                                                                                                                                                                                                                                                                                                                                                                                                                                                                                                                                  |         |
| Participants              | 6       | (a) <i>Cohort study</i> —Give the eligibility criteria, and the sources and methods of selection of participants. Describe methods of follow-up<br><i>Case-control study</i> —Give the eligibility criteria, and the sources and methods of case ascertainment and control selection. Give the rationale for the choice of cases and controls<br><i>Cross-sectional study</i> —Give the eligibility criteria, and the sources and methods of selection of participants<br>(b) <i>Cohort study</i> —For matched studies, give matching criteria and number of exposed and unexposed<br><i>Case-control study</i> —For matched studies, give matching criteria and the number of controls per case |         |
| Variables                 | 7       | Clearly define all outcomes, exposures, predictors, potential confounders, and effect modifiers. Give diagnostic criteria, if applicable                                                                                                                                                                                                                                                                                                                                                                                                                                                                                                                                                         |         |
| Data sources/measurement  | 8*      | For each variable of interest, give sources of data and details of methods of assessment (measurement). Describe comparability of assessment methods if there is more than one group                                                                                                                                                                                                                                                                                                                                                                                                                                                                                                             |         |
| Bias                      | 9       | Describe any efforts to address potential sources of bias                                                                                                                                                                                                                                                                                                                                                                                                                                                                                                                                                                                                                                        |         |
| Study size                | 10      | Explain how the study size was arrived at                                                                                                                                                                                                                                                                                                                                                                                                                                                                                                                                                                                                                                                        |         |
| Quantitative variables    | 11      | Explain how quantitative variables were handled in the analyses. If applicable, describe which groupings were chosen and why                                                                                                                                                                                                                                                                                                                                                                                                                                                                                                                                                                     |         |
| Statistical methods       | 12      | (a) Describe all statistical methods, including those used to control for confounding<br>(b) Describe any methods used to examine subgroups and interactions<br>(c) Explain how missing data were addressed<br>(d) <i>Cohort study</i> —If applicable, explain how loss to follow-up was addressed<br><i>Case-control study</i> —If applicable, explain how matching of cases and controls was addressed<br><i>Cross-sectional study</i> —If applicable, describe analytical methods taking account of sampling strategy<br>(e) Describe any sensitivity analyses                                                                                                                                |         |

1  
2  
3  
4  
5  
6  
7  
8  
9  
10  
11  
12  
13  
14  
15  
16  
17  
18  
19  
20  
21  
22  
23  
24  
25  
26  
27  
28  
29  
30  
31  
32  
33  
34  
35  
36  
37  
38  
39  
40  
41  
42  
43  
44  
45  
46  
47  
48  
49  
50  
51  
52  
53  
54  
55  
56  
57  
58  
59  
60

Continued on next page

For peer review only



1  
2  
3  
4  
5  
6  
7  
8  
9  
10  
11  
12  
13  
14  
15  
16  
17  
18  
19  
20  
21  
22  
23  
24  
25  
26  
27  
28  
29  
30  
31  
32  
33  
34  
35  
36  
37  
38  
39  
40  
41  
42  
43  
44  
45  
46  
47  
48  
49  
50  
51  
52  
53  
54  
55  
56  
57  
58  
59  
60**Results**

|                  |         |                                                                                                                                                                                                                                                                                                                                                                                                               |  |
|------------------|---------|---------------------------------------------------------------------------------------------------------------------------------------------------------------------------------------------------------------------------------------------------------------------------------------------------------------------------------------------------------------------------------------------------------------|--|
| Participants     | 13<br>* | (a) Report numbers of individuals at each stage of study—eg numbers potentially eligible, examined for eligibility, confirmed eligible, included in the study, completing follow-up, and analysed<br>(b) Give reasons for non-participation at each stage<br>(c) Consider use of a flow diagram                                                                                                               |  |
| Descriptive data | 14<br>* | (a) Give characteristics of study participants (eg demographic, clinical, social) and information on exposures and potential confounders<br>(b) Indicate number of participants with missing data for each variable of interest<br>(c) <i>Cohort study</i> —Summarise follow-up time (eg, average and total amount)                                                                                           |  |
| Outcome data     | 15<br>* | <i>Cohort study</i> —Report numbers of outcome events or summary measures over time<br><i>Case-control study</i> —Report numbers in each exposure category, or summary measures of exposure<br><i>Cross-sectional study</i> —Report numbers of outcome events or summary measures                                                                                                                             |  |
| Main results     | 16      | (a) Give unadjusted estimates and, if applicable, confounder-adjusted estimates and their precision (eg, 95% confidence interval). Make clear which confounders were adjusted for and why they were included<br>(b) Report category boundaries when continuous variables were categorized<br>(c) If relevant, consider translating estimates of relative risk into absolute risk for a meaningful time period |  |
| Other analyses   | 17      | Report other analyses done—eg analyses of subgroups and interactions, and sensitivity analyses                                                                                                                                                                                                                                                                                                                |  |

**Discussion**

|                  |    |                                                                                                                                                                            |  |
|------------------|----|----------------------------------------------------------------------------------------------------------------------------------------------------------------------------|--|
| Key results      | 18 | Summarise key results with reference to study objectives                                                                                                                   |  |
| Limitations      | 19 | Discuss limitations of the study, taking into account sources of potential bias or imprecision. Discuss both direction and magnitude of any potential bias                 |  |
| Interpretation   | 20 | Give a cautious overall interpretation of results considering objectives, limitations, multiplicity of analyses, results from similar studies, and other relevant evidence |  |
| Generalisability | 21 | Discuss the generalisability (external validity) of the study results                                                                                                      |  |

**Other information**

|         |    |                                                                                                                                                               |  |
|---------|----|---------------------------------------------------------------------------------------------------------------------------------------------------------------|--|
| Funding | 22 | Give the source of funding and the role of the funders for the present study and, if applicable, for the original study on which the present article is based |  |
|---------|----|---------------------------------------------------------------------------------------------------------------------------------------------------------------|--|

\*Give information separately for cases and controls in case-control studies and, if applicable, for exposed and unexposed groups in cohort and cross-sectional studies.

**Note:** An Explanation and Elaboration article discusses each checklist item and gives methodological background and published examples of transparent reporting. The STROBE checklist is best used in conjunction with this article (freely available on the Web sites of PLoS Medicine at <http://www.plosmedicine.org/>, Annals of Internal Medicine at <http://www.annals.org/>, and Epidemiology at <http://www.epidem.com/>). Information on the STROBE Initiative is available at [www.strobe-statement.org](http://www.strobe-statement.org).

# BMJ Open

## Clinical outcome of nonalcoholic fatty liver disease: an eleven-year follow-up study

|                                 |                                                                                                                                                                                                                                                                                                                                                                                                                                                                                                                                                                                                                                                                                                                                                                                                                                                                                                                                                                                                                                                                                                                                                                                                                                                                                                                                                                                                                                                                                                                                                                                                                                                                                                                                                                       |
|---------------------------------|-----------------------------------------------------------------------------------------------------------------------------------------------------------------------------------------------------------------------------------------------------------------------------------------------------------------------------------------------------------------------------------------------------------------------------------------------------------------------------------------------------------------------------------------------------------------------------------------------------------------------------------------------------------------------------------------------------------------------------------------------------------------------------------------------------------------------------------------------------------------------------------------------------------------------------------------------------------------------------------------------------------------------------------------------------------------------------------------------------------------------------------------------------------------------------------------------------------------------------------------------------------------------------------------------------------------------------------------------------------------------------------------------------------------------------------------------------------------------------------------------------------------------------------------------------------------------------------------------------------------------------------------------------------------------------------------------------------------------------------------------------------------------|
| Journal:                        | <i>BMJ Open</i>                                                                                                                                                                                                                                                                                                                                                                                                                                                                                                                                                                                                                                                                                                                                                                                                                                                                                                                                                                                                                                                                                                                                                                                                                                                                                                                                                                                                                                                                                                                                                                                                                                                                                                                                                       |
| Manuscript ID                   | bmjopen-2021-054891.R1                                                                                                                                                                                                                                                                                                                                                                                                                                                                                                                                                                                                                                                                                                                                                                                                                                                                                                                                                                                                                                                                                                                                                                                                                                                                                                                                                                                                                                                                                                                                                                                                                                                                                                                                                |
| Article Type:                   | Original research                                                                                                                                                                                                                                                                                                                                                                                                                                                                                                                                                                                                                                                                                                                                                                                                                                                                                                                                                                                                                                                                                                                                                                                                                                                                                                                                                                                                                                                                                                                                                                                                                                                                                                                                                     |
| Date Submitted by the Author:   | 17-Mar-2022                                                                                                                                                                                                                                                                                                                                                                                                                                                                                                                                                                                                                                                                                                                                                                                                                                                                                                                                                                                                                                                                                                                                                                                                                                                                                                                                                                                                                                                                                                                                                                                                                                                                                                                                                           |
| Complete List of Authors:       | <p>Tang, Xiaoping ; Ningbo Zhenhai District Lianhua Hospital , Department of Prevention and Health Care</p> <p>Shi, Yanyan; Peking University Third Hospital, Research Center of Clinical Epidemiology</p> <p>Du, Juan ; Ningbo Zhenhai District Lianhua Hospital , Department of Internal Medicine</p> <p>Hu, Keming; Ningbo Zhenhai District Lianhua Hospital, Department of Prevention and Health Care</p> <p>Zhou, Tingting; Ningbo Zhenhai District Lianhua Hospital , Department of Internal Medicine</p> <p>Chen, Lan; Ningbo Zhenhai District Lianhua Hospital , Department of Radiology</p> <p>Zhang, Yanming; Ningbo Zhenhai District Lianhua Hospital , Center Laboratory</p> <p>Li, Fujun; Ningbo Zhenhai District Lianhua Hospital , Department of Radiology</p> <p>Zhang, Huier ; Ningbo Zhenhai District Lianhua Hospital , Center Laboratory</p> <p>Liebe, Roman ; Heinrich Heine University Düsseldorf, Clinic of Gastroenterology, Hepatology and Infectious Diseases,; Saarland University, Department of Medicine II, Saarland University Medical Center</p> <p>Meyer, Christoph ; Heidelberg University, Department of Medicine II, Medical Faculty Mannheim</p> <p>Dooley, Steven ; Heidelberg University, Department of Medicine II, Medical Faculty Mannheim</p> <p>Zhu, Zhongwei; Ningbo Zhenhai District Lianhua Hospital , Department of Surgery</p> <p>Weng, Hong-Lei ; Heidelberg University, Department of Medicine II, Medical Faculty Mannheim</p> <p>JIA, Jinzhu; Peking University, Department of Biostatistics, School of Public Health; Peking University, Center for Statistical Science</p> <p>Huang, Tong; Ningbo City First Hospital; Ningbo Zhenhai District Lianhua Hospital , Department of Prevention and Health Care</p> |
| <b>Primary Subject Heading</b>: | Infectious diseases                                                                                                                                                                                                                                                                                                                                                                                                                                                                                                                                                                                                                                                                                                                                                                                                                                                                                                                                                                                                                                                                                                                                                                                                                                                                                                                                                                                                                                                                                                                                                                                                                                                                                                                                                   |
| Secondary Subject Heading:      | Infectious diseases                                                                                                                                                                                                                                                                                                                                                                                                                                                                                                                                                                                                                                                                                                                                                                                                                                                                                                                                                                                                                                                                                                                                                                                                                                                                                                                                                                                                                                                                                                                                                                                                                                                                                                                                                   |
| Keywords:                       | Epidemiology < INFECTIOUS DISEASES, Hypertension < CARDIOLOGY,                                                                                                                                                                                                                                                                                                                                                                                                                                                                                                                                                                                                                                                                                                                                                                                                                                                                                                                                                                                                                                                                                                                                                                                                                                                                                                                                                                                                                                                                                                                                                                                                                                                                                                        |

1  
2  
3  
4  
5  
6  
7  
8  
9  
10  
11  
12  
13  
14  
15  
16  
17  
18  
19  
20  
21  
22  
23  
24  
25  
26  
27  
28  
29  
30  
31  
32  
33  
34  
35  
36  
37  
38  
39  
40  
41  
42  
43  
44  
45  
46  
47  
48  
49  
50  
51  
52  
53  
54  
55  
56  
57  
58  
59  
60

|  |                                                                                                                                                    |
|--|----------------------------------------------------------------------------------------------------------------------------------------------------|
|  | DIABETES & ENDOCRINOLOGY, Health & safety < HEALTH SERVICES<br>ADMINISTRATION & MANAGEMENT, Health informatics <<br>BIOTECHNOLOGY & BIOINFORMATICS |
|  |                                                                                                                                                    |

SCHOLARONE™  
Manuscripts



I, the Submitting Author has the right to grant and does grant on behalf of all authors of the Work (as defined in the below author licence), an exclusive licence and/or a non-exclusive licence for contributions from authors who are: i) UK Crown employees; ii) where BMJ has agreed a CC-BY licence shall apply, and/or iii) in accordance with the terms applicable for US Federal Government officers or employees acting as part of their official duties; on a worldwide, perpetual, irrevocable, royalty-free basis to BMJ Publishing Group Ltd ("BMJ") its licensees and where the relevant Journal is co-owned by BMJ to the co-owners of the Journal, to publish the Work in this journal and any other BMJ products and to exploit all rights, as set out in our [licence](#).

The Submitting Author accepts and understands that any supply made under these terms is made by BMJ to the Submitting Author unless you are acting as an employee on behalf of your employer or a postgraduate student of an affiliated institution which is paying any applicable article publishing charge ("APC") for Open Access articles. Where the Submitting Author wishes to make the Work available on an Open Access basis (and intends to pay the relevant APC), the terms of reuse of such Open Access shall be governed by a Creative Commons licence – details of these licences and which [Creative Commons](#) licence will apply to this Work are set out in our licence referred to above.

Other than as permitted in any relevant BMJ Author's Self Archiving Policies, I confirm this Work has not been accepted for publication elsewhere, is not being considered for publication elsewhere and does not duplicate material already published. I confirm all authors consent to publication of this Work and authorise the granting of this licence.

## Clinical outcome of nonalcoholic fatty liver disease: an eleven-year follow-up study

Xiaoping Tang<sup>1#</sup>, Yanyan Shi<sup>2#</sup>, Juan Du<sup>3#</sup>, Keming Hu<sup>1</sup>, Tingting Zhou<sup>3</sup>, Lan Chen<sup>4</sup>, Yanming Zhang<sup>5</sup>, Fujun Li<sup>4</sup>, Huier Zhang<sup>5</sup>, Roman Liebe<sup>6,7</sup>, Christoph Meyer<sup>8</sup>, Steven Dooley<sup>8</sup>, Zhongwei Zhu<sup>9</sup>, Hong-Lei Weng<sup>8</sup>, Jinzhu Jia<sup>10,11\*</sup>, Tong Huang<sup>1,12\*</sup>

<sup>1</sup> Department of Prevention and Health Care, Ningbo Zhenhai Lianhua Hospital, Ningbo, China

<sup>2</sup> Research Center of Clinical Epidemiology, Peking University Third Hospital, Beijing, China

<sup>3</sup> Department of Internal Medicine, Ningbo Zhenhai Lianhua Hospital, Ningbo, China

<sup>4</sup> Department of Radiology, Ningbo Zhenhai Lianhua Hospital, Ningbo, China

<sup>5</sup> Center Laboratory, Ningbo Zhenhai Lianhua Hospital, Ningbo, China

<sup>6</sup> Clinic of Gastroenterology, Hepatology and Infectious Diseases, Heinrich Heine University, Düsseldorf, Germany;

<sup>7</sup> Department of Medicine II, Saarland University Medical Center, Saarland University, Homburg, Germany;

<sup>8</sup> Department of Medicine II, Medical Faculty Mannheim, Heidelberg University, Mannheim, Germany;

<sup>9</sup> Department of Surgery, Ningbo Zhenhai Lianhua Hospital, Ningbo, China

<sup>10</sup> Department of Biostatistics, School of Public Health, Peking University Health Science Center, Beijing, 100191, P.R. China

<sup>11</sup> Center for Statistical Science, Peking University, Beijing, 100871, P.R. China

<sup>12</sup> Center of health Management, Ningbo No.1 Hospital

# These authors contributed to the project equally.

\* Co-senior authors

### Corresponding authors:

Tong Huang, MD

Center of health Management, Ningbo No.1 Hospital

Address: No. 59, Liuting Street, Haishu District, Ningbo, Zhejiang Province, 315010, P.R. China

Email: nbbjzxht@163.com

Tel: +86-135868350952

1  
2  
3 35  
4  
5 36 Jinzhu Jia, PhD.  
6  
7 37 Department of Biostatistics, School of Public Health, Peking University Health Science  
8  
9 38 Center  
10  
11 39 Address: No. 38, Xueyuan Road, Haidian District, Beijing, 100191, P.R. China  
12  
13 40 Email: jzjia@math.pku.edu.cn  
14  
15 41 Tel: +86-15801049187  
16  
17 42

17 43 **Acknowledgements:**

18  
19 44 This project is supported by the National Key R&D Program of China No. 2017YFC0908103  
20  
21 45 (X.T., and J.D.). We are grateful to Drs. Changxi Chen, Jingyi Yuan and Yongjun Chen for  
22  
23 46 support and discussion.  
24  
25 47  
26  
27 48

1  
2  
3 **49 Abstract**

4 50  
5 51 **Objectives** To clarify NAFLD prevalence, risk factors, and clinical outcome in an exemplary  
6 52 Chinese population, a cohort of company employees was followed up for eleven years.

7 53 **Design** Retrospective cohort

8 54 **Setting** Between 2006-2016 in China

9 55 **Participants** 13032 company employees

10 56 **Results** Over eleven years, the prevalence of NAFLD increased from 17.2% to 32.4% (males  
11 57 20.5% to 37% *versus* females 9.8% to 22.2%). Male peak prevalence was between 40 and 60  
12 58 years of age, whereas highest prevalence in women was at an age of 60 years and older. Logistic  
13 59 and Cox regression revealed 16 risk factors, including BMI, albumin, WBC, TG, HDL, GLT,  
14 60 ALT, Cr, UA, Glu, SBp, DBp, ESR, HGB, PLT and ApoB. The AUC of these variables for  
15 61 NAFLD is 0.88. However, cause-effect analyses showed that only BMI, gender and  
16 62 triglycerides directly contributed to NAFLD development. Over an 11-year follow-up period,  
17 63 12.6%, 37.7% and 14.2% of male NAFLD patients and 11.6%, 44.7% and 22.6% of female  
18 64 NAFLD patients developed diabetes, hypertension and hyperuricemia, respectively. Except one  
19 65 male patient who developed cirrhosis, no NAFLD patients progressed into severe liver disease.

20 66 **Conclusion** Diabetes, hypertension and hyperuricemia are the main clinical outcomes of  
21 67 NAFLD. Eleven years of NAFLD are not sufficient to cause severe liver disease. Age and  
22 68 obesity are direct risk factors for NAFLD. BMI, gender and triglycerides are three parameters  
23 69 directly reflecting the occurrence of NAFLD.

24 70

25 71 **(Words: 221)**

26 72

27 73 **Strengths and limitations of this study**

- 28 74 ● This study dynamically follows up NAFLD prevalence in an eastern Chinese community  
29 75 for eleven years.
- 30 76 ● The study adopted First order Markov models to evaluate the cause-effect link between  
31 77 NAFLD and risk factors.
- 32 78 ● The relatively low sensitivity of ultrasound for the detection of liver fat might  
33 79 underestimate the incidence of NAFLD in this cohort.
- 34 80 ● Given that the current study is a single-center observation, multiple-center studies are  
35 81 required to confirm the conclusions in the future.

- 1  
2  
3 82 ● The study population is a highly select, relatively homogenous group of well-educated  
4 professionals in privileged social positions and permanent employment. Thus, the  
5 83  
6 84 conclusions might not be transferable to the general Chinese population.  
7  
8 85  
9  
10  
11  
12  
13  
14  
15  
16  
17  
18  
19  
20  
21  
22  
23  
24  
25  
26  
27  
28  
29  
30  
31  
32  
33  
34  
35  
36  
37  
38  
39  
40  
41  
42  
43  
44  
45  
46  
47  
48  
49  
50  
51  
52  
53  
54  
55  
56  
57  
58  
59  
60

For peer review only



## 86 Introduction

87 Non-alcoholic fatty liver disease (NAFLD) is one of the most common causes of chronic liver  
88 disease globally [1]. The global prevalence of NAFLD is currently around 25% [2,3]. NAFLD is  
89 predicted to become the most frequent indication for liver transplantation by 2030 in Western  
90 countries [4]. An analysis based on 18 million patients in four European cohorts showed that  
91 NAFLD and non-alcoholic steatohepatitis (NASH) increase the risk of end-stage liver diseases,  
92 e.g., cirrhosis and hepatocellular carcinoma (HCC) [5]. Of note, NAFLD is not only a disease  
93 restricted to the liver, but also affects extra-hepatic organs. NAFLD is tightly associated with  
94 the occurrence of type 2 diabetes mellitus (T2DM), cardiovascular (CVD) and cardiac diseases,  
95 and chronic kidney disease (CKD) [4].

96  
97 In China, the incidence of NAFLD has been increasing over the last two decades. A recent  
98 meta-analysis, based on 392 studies between 2008 and 2018, showed the national incidence of  
99 NAFLD in China to be at 29.2% [6]. In Shanghai, the adult incidence of NAFLD has increased  
100 from 14.04% in 1995 to 43.65% in 2015 [2]. Being a vast country, Chinese living in different  
101 areas vary widely in lifestyle and economic status. Thus, the epidemiology, natural history and  
102 clinical outcomes of NAFLD in different areas of the country are worth further investigation.

103  
104 It is well accepted that viral hepatitis is a major reason for progressive chronic liver diseases,  
105 e.g., fibrosis, cirrhosis and ultimately, hepatocellular carcinoma (HCC). With regard to  
106 NAFLD, incidence and severity of associated chronic liver disease outcomes has not been  
107 monitored in large Chinese cohorts yet – especially over an extended time span. The current  
108 study therefore describes the prevalence of NAFLD in a large Eastern Chinese community over  
109 eleven years (2006 - 2016). We focused on three aspects: (1) annual prevalence of NAFLD, (2)  
110 risk factors of NAFLD, and (3) intra- and extra-hepatic clinical outcomes of NAFLD.

## 113 Methods

### 114 *Patient and public involvement*

115 No patients were involved in this study

### 116 *Design and participants*

117  
118 In this retrospective study we analyzed the "annual health examination database" of the Zhenhai  
119 Lianhua Hospital from 2006 to 2016. This hospital is affiliated to Sinopec Zhenhai Refining &  
120 Chemical Company. Supported by the company, all employees were offered the opportunity to  
121

1  
2  
3 122 go to this hospital for an annual health examination. During 11 years, a total 13,032 employees  
4  
5 123 received health examinations. From 2006 to 2016, 11689, 11706, 11584, 9521, 9592, 9725,  
6  
7 124 9710, 9869, 9718, 9702 and 9706 persons received health examinations (**Figure 1**). To describe  
8  
9 125 the longitudinal NAFLD occurrence in this cohort, we excluded subjects with the following  
10  
11 126 conditions: (1) viral hepatitis B and C infection, which were identified by blood virus  
12  
13 127 measurements (HBV-DNA and HCV-RNA), and (2) alcoholic liver disease, which was defined  
14  
15 128 as previously described [7,8]. NAFLD was defined as the presence of hepatic steatosis,  
16  
17 129 determined by ultrasonography.

17 130 The study protocol was approved by the Ethics Committee of Zhenhai Lianhua Hospital  
18  
19 131 ([2016]001). Informed consent was obtained from all subjects.  
20  
21 132

22 133

### 23 133 *Measures*

24 134 **Supplementary Table 1** shows all parameters measured in the annual health examinations.  
25  
26 135 Ultrasonography was performed by the same three experienced doctors (L.C., F. L., and J.Y.)  
27  
28 136 with an Ultrasonograph B, GE, Voluson 730 pro. Blood biochemistry and HBV serum levels  
29  
30 137 were measured by an Olympus AU640 autoanalyzer (Olympus, Kobe, Japan) and an  
31  
32 138 ImmunoAssay Analyzer VitrosECI (JOHNSON-JOHNSON, USA), respectively. All methods  
33  
34 139 were carried out in accordance with relevant guidelines and regulations.  
35  
36 140

### 37 141 *Statistical analysis*

38 142 For population characteristics, variables were described as means and standard deviation (SD)  
39  
40 143 or proportions as appropriate. Student's t-test or nonparametric test was used to analyze  
41  
42 144 differences between two groups as mentioned. Chi-square test was used to verify the differences  
43  
44 145 of nominative variables between two groups. Multivariate analysis of risk factors for NAFLD  
45  
46 146 was performed using logistic regression analysis. Combined receiver operating characteristic  
47  
48 147 curve (ROC) and area under curve (AUC) analyses were used to evaluate the diagnostic  
49  
50 148 performance of biomarkers based on the logistic regression model. Multivariate Cox regression  
51  
52 149 model was performed to calculate hazard ratios of variables to identify independent prognostic  
53  
54 150 variables. First order Markov models were used to analyze the cause-effect link between  
55  
56 151 NAFLD and risk factors. L1 penalized logistic regression was applied to select predictive  
57  
58 152 predictors. R package "glmnet" contains functions to select predictors using L1 penalized  
59  
60 153 logistic regression. Statistical analyses were performed using SPSS 22.0 and R version 3.5.3.  
154  
155 154 *P*-values that were less than 0.05 were considered statistically significant. Figures were  
generated by R package such as 'forestplot', 'ROCR', 'bnlearn', or 'survival'.

1  
2  
3 156  
4  
5 157  
6  
7 158  
8 159  
9 160  
10  
11 161  
12 162  
13  
14 163  
15  
16 164  
17 165  
18 166  
19 167  
20 168  
21 169  
22 170  
23 171  
24 172  
25 173  
26 174  
27 175  
28 176  
29 177  
30 178  
31 179  
32  
33 180  
34 181  
35 182  
36 183  
37 184  
38 185  
39 186  
40 187  
41 188  
42 189  
43 190

## Results

### *Prevalence of NAFLD from 2006 to 2016*

We retrospectively analyzed 9786, 9852, 9827, 8026, 8225, 8309, 8311, 8552, 8442, 8463 and 8436 persons who received health examinations from 2006 to 2016. **Supplementary Table 2** shows the eleven-year annual NAFLD prevalence in this population. In 2006, NAFLD was diagnosed in 17.2% of persons, and gradually increased over the examination period to 19% (2007), 22% (2008), 22.4% (2009), 22.7% (2010), 23.4% (2011), 24.5% (2012), 25.4% (2013), 27.9% (2014), 30.8% (2015), and 32.4% (2016), respectively (**Supplementary Table 2**). Both males and females demonstrated continuously increasing NAFLD prevalence (**Supplementary Table 2**). Compared to females, male Chinese demonstrated significantly higher NAFLD prevalence, e.g., in 2006, the prevalence of NAFLD in males and females was 20.5% and 9.8%, respectively. Eleven years later, the prevalence had increased to 37% in males and 22.2% in females (**Supplementary Table 2**). Noteworthy, the prevalence of NAFLD in male and female was correlating with age. The peak prevalence of NAFLD in men emerged in those aged between 40 and 60 years. In 2006, the prevalence of NAFLD in men aged between 40 - 50 and 50 - 60 years was 24.2% and 24.6%, respectively. In 2016, prevalence reached 42.8% and 46.6% (**Supplementary Table 2**) for men. Distinct from males, the peak NAFLD prevalence in females emerged at an age above 60 years. In 2006, the prevalence of NAFLD in women older than 60 and 70 years was 25.6% and 22.9%, respectively. Eleven years later, these values had increased to 53.4% and 30.9% (**Supplementary Table 2**).

Among the observed population, 5606 persons received annual health examinations for 11 years, and thus prevalence of NAFLD was analyzed in these individuals. As shown in **Table 1**, the prevalence of NAFLD increased from 17% in 2006 to 35.2% in 2016. The highest prevalence rates for NAFLD in 3795 men emerged in those older than 40 years. In 2006, the NAFLD prevalence in males aged between 40 - 50, 50 - 60, and 60 - 70 years was 24.2%, 25.4% and 19.8%, respectively. In 2016, these values reached 43.3%, 46.8% and 42.3% (**Table 1**). Different from males, the peak NAFLD prevalence in 1811 females emerged at an age of more than 60 years. In 2006, the prevalence of NAFLD in women older than 60 or 70 years was 22.1% and 28%, respectively. Eleven years later, these values had increased to 31.8% and 28.6% (**Table 1**).

### 191 *BMI and NAFLD incidence*

192 Given the tight link between obesity and NAFLD, we paid special attention to the population  
193 with high BMI. We focused on the 5606 persons with complete follow-up and analyzed the  
194 prevalence of NAFLD in those with BMI >25. In total, out of the 5606 persons, 2445 presented  
195 with a BMI of >25. The prevalence of NAFLD in this overweight subpopulation was far higher  
196 than in the general population. In 2006, 45.2% of individuals (n=1104; male vs. female: 47.3%  
197 vs. 37.1%) with BMI >25 were suffering from NAFLD (**Supplementary Table 3**). In 2016,  
198 values reached 67.1% (n=1414; male vs. female: 69% vs. 59.2%, **Supplementary Table 3**).  
199 Impressively, the NAFLD prevalence in both genders was very high at any age, even in those  
200 below the age of 30 years. In 2006, among 213 overweight men, younger than 30 years, 52.6%  
201 were also diagnosed for NAFLD (**Supplementary Table 3**). This number increased to 63% in  
202 2016 (**Supplementary Table 3**). In 2006, there were 15 overweight women aged less than 30  
203 years. Among them, 3 presented as NAFLD (20%). In 2016, 7 out of 16 overweight women  
204 aged less than 30 years were identified. The NAFLD prevalence had increased to 43.8%  
205 (**Supplementary Table 3**). In those older than 40 years, NAFLD prevalence increased from  
206 36.6 – 45.4% in 2006 to 53 – 65.6% (**Supplementary Table 3**).

### 208 *Risk factors relevant to NAFLD occurrence*

209 Next, we analyzed risk factors relevant to NAFLD occurrence. Logistic regression analysis was  
210 performed on 26 parameters, including gender, age, BMI, albumin, white globulin ratio (WGR),  
211 white blood cell count (WBC), low density lipoprotein (LDL), triglycerides (TG), high density  
212 lipoprotein (HDL), glutamyl transpeptidase (GLT), alanine transaminase (ALT), aspartate  
213 transaminase (AST), creatinine (Cr), alkaline phosphatase (ALP), blood urea nitrogen (Bun),  
214 uric acid (UA), blood glucose (Glu), systolic blood pressure (SBp), diastolic blood pressure  
215 (DBp), Blood sedimentation (ESR), hemoglobin (HGB), platelets (PLT), Apolipoprotein A1  
216 (ApoA1), Apolipoprotein B2 (ApoB), total bilirubin (TB), total protein (TP). We performed  
217 variable selection by penalized Logistic regression using R package glmnet. Cross validation  
218 selected 16 variables as potential predictors. These were BMI, albumin, WBC, TG, HDL, GLT,  
219 ALT, Cr, UA, Glu, SBp, DBp, ESR, HGB, PLT and ApoB (**Supplementary Table 4**). The  
220 corresponding forest-plot is shown in **Figure 2A**. Among these variables, ApoB and BMI  
221 displayed the most robust positive correlation with NAFLD occurrence, while HDL had a  
222 strong negative correlation with NAFLD incidence (**Supplementary Table 4**). The AUC of  
223 these variables for NAFLD is 0.88 (see ROC curve in **Figure 2B**). We further performed a time  
224 dependent Cox regression to calculate the hazard ratios of these parameters for NAFLD

1  
2  
3 225 occurrence. Cox regression confirmed that the 16 parameters were significantly relevant to  
4 226 NAFLD incidence (**Supplementary Table 5** and **Figure 2C**). Furthermore, ApoB and HDL  
5 227 were the most robust positive and negative risk factors for NAFLD (**Figure 2C**).  
6  
7  
8  
9

10  
11

#### 12 229 *Cause-effect link between risk factors and NAFLD occurrence*

13 230 Although the aforementioned parameters were regarded as “risk factors” according to statistical  
14 231 models, it did not necessarily mean that all of them contributed to NAFLD occurrence. Based  
15 232 on 11 years of longitudinal data, it was possible to construct a dynamic Bayesian network to  
16 233 identify the risk factors most relevant to NAFLD occurrence. As shown in **Figure 3**, these  
17 234 parameters constituted a complicated, but clear intercross paradigm. Only three parameters,  
18 235 BMI, gender and TG directly pointed to NAFLD. In addition, ApoB impacted the incidence of  
19 236 NAFLD through contributing to TG. Furthermore, LDL can indirectly contribute to NAFLD  
20 237 through influencing ApoB. Very impressively, the dynamic Bayesian network pointed out that  
21 238 NAFLD directly leads to alterations of seven parameters: ALT, DBp, SBp, TP, albumin, HGB  
22 239 and UA. Intriguingly, age, GLT, AST, Cr, and BUN did not interact with any other parameter  
23 240 in our model, indicating that these factors by incidence correlate, but not any causal interaction  
24 241 is existing.  
25  
26  
27  
28  
29  
30  
31  
32  
33

34

#### 35 243 *Outcome of NAFLD*

36 244 Subsequently, we examined clinical outcomes of NAFLD over the eleven years. **Table 2**  
37 245 summarizes the incidence of intra- and extrahepatic diseases of 696 NAFLD and 222 NASH  
38 246 patients during the follow-up period. Among the total NAFLD and NASH population, only 1  
39 247 male NAFLD patient developed liver cirrhosis within the eleven years. However, this time span  
40 248 witnessed significantly increased extrahepatic diseases, including diabetes, hypertension and  
41 249 hyperuricemia. In the NAFLD population, there were 64 (12.6%) men and 22 (11.6%) women,  
42 250 191 (37.7%) men and 85 (44.7%) women, 72 (14.2%) men and 43 (22.6%) women who  
43 251 developed into type II diabetes, hypertension and hyperuricemia, respectively (**Table 2**).  
44  
45  
46  
47  
48  
49

50 252 Given that 2006 is the starting point of data collection, patients diagnosed for NAFLD in this  
51 253 year had by no means just manifested their disease, but rather patients had possibly developed  
52 254 NAFLD several years prior to inclusion. To clarify the exact clinical outcomes of NAFLD over  
53 255 one decade, we focused on the following two cohorts of individuals with annual health  
54 256 examinations for 11 years: (1) patients who were diagnosed as non-NAFLD in 2006, but were  
55 257 NAFLD in 2007 (new NAFLD cohort); and (2) who were non-NAFLD in both 2006 and 2007  
56 258 (non-NAFLD cohort). As shown in **Table 2**, 185 new NAFLD cases (138 men and 47 women)

1  
2  
3 259 and 4547 non-NAFLD (2786 men and 1761 women) persons were found in 2007. Between  
4  
5 260 2007 and 2016, neither NAFLD nor non-NAFLD individuals developed liver cirrhosis or  
6  
7 261 cancer. However, the one-decade follow-up reveals different prevalences of diabetes,  
8  
9 262 hypertension and hyperuricemia: In NAFLD patients, there were 14 (10.1%) men and 5 (10.6%)  
10  
11 263 women, 47 (34.1%) men and 21 (44.7%) women, 34 (24.6%) men and 8 (17%) women who  
12  
13 264 developed type II diabetes, hypertension and hyperuricemia, respectively (**Table 2**). In non-  
14  
15 265 NAFLD individuals, 157 (5.6%) men and 54 (3.4%) women, 259 (9.3%) men and 324 (18.4%),  
16  
17 266 284 (10.2%) men and 84 women (4.8%) developed type II diabetes, hypertension and  
18  
19 267 hyperuricemia, respectively (**Table 2**). For all three diseases, statistically significant differences  
20  
21 268 were determined between the two cohorts of population (all  $P < 0.05$ , **Table 2**). These results  
22  
23 269 suggest that diabetes, hypertension and hyperuricemia are the main clinical outcomes of  
24  
25 270 NAFLD.  
26  
27 271

## 272 273 **Discussion**

274 This eleven-year follow-up retrospective study reports the following: (1) NAFLD prevalence  
275 has substantially increased in the examined Eastern Chinese population. (2) The prevalence of  
276 NAFLD differs by gender and age. Middle-aged men and elderly women are the two  
277 populations at highest risk for NAFLD. (3) Gender, BMI and triglycerides are the parameters  
278 directly associated with NAFLD occurrence. Regardless of gender and age, persons with high  
279 BMI ( $\geq 25$ ) have a high risk for NAFLD development. (4) NAFLD directly leads to alterations  
280 of seven clinical parameters: ALT, DBp, SBp, TP, albumin, HGB and UA. (5) Within 11 years,  
281 a significant part of the NAFLD population develops three clinically relevant diseases: type 2  
282 diabetes mellitus, hypertension and hyperuricemia. (6) Within 11 years, NAFLD does not cause  
283 severe liver disease, such as cirrhosis or HCC, in patients.  
284

285 The most impressive observation of the current study is that among 918 diseased persons (696  
286 NAFLD and 222 NASH), no patient progressed towards HCC and only 1 male NAFLD patient  
287 developed liver cirrhosis within the 11 years. Furthermore, among 185 new NAFLD cases  
288 diagnosed in 2007, none developed liver cirrhosis or liver cancer. Liver cirrhosis and HCC are  
289 commonly regarded as the most severe and costly clinical outcomes of NAFLD [9]. In USA and  
290 Europe, it is estimated that 10-15% of NAFLD patients develop advanced fibrosis [10]. In China,  
291 a study with biopsy-proven NAFLD revealed 1.97%-2.97% cirrhosis prevalence [11]. In  
292 addition, NAFLD is regarded as the third-most common cause of cancer-related death  
293 worldwide [12]. In a study based on 4949 US patients with HCC, 701 patients had NAFLD [13].

1  
2  
3 294 It was estimated that the cumulative incidence of HCC among patients with NAFLD and  
4  
5 295 cirrhosis ranges from 2.4% to 12.8% over a median follow-up period of 3.2 to 7.2 years <sup>[14]</sup>  
6  
7 296 (Global Health Observatory) data. Mortality and global health estimates were obtained from:  
8  
9 297 [http://www.who.int/gho/mortality\\_burden\\_disease/en/](http://www.who.int/gho/mortality_burden_disease/en/). Last accessed on 1/7/2020.). Given that  
10  
11 298 the above conclusions were based on cross-sectional investigations and statistical models, it has  
12  
13 299 been unknown to date over which period a NAFLD patient develops liver cirrhosis or HCC  
14  
15 300 (personal risk assessment). Our 11-year follow-up provides therefore a valuable and  
16  
17 301 comprehensive dataset. In this study, most patients were diagnosed with NAFLD when they  
18  
19 302 received a routine health examination. Before the examination, these people did not have any  
20  
21 303 symptoms or signs of NAFLD. Therefore, they belong to NAFLD patients at a very early stage  
22  
23 304 (although for 2006, the duration of pre-existing NAFLD cannot be determined). Except for a  
24  
25 305 single person, no serious liver problems were observed within this time period. These data  
26  
27 306 suggest that for the vast majority of patients with early stage NAFLD, 11 years are not sufficient  
28  
29 307 to develop liver cirrhosis or cancer. Nasr et al followed up 129 NAFLD patients with varying  
30  
31 308 fibrosis stages on two occasions (mean time 13.7 and 9.3 years). Liver biopsy analyses showed  
32  
33 309 that 9.3% of patients developed end-stage liver disease and 34% advanced fibrosis <sup>[15]</sup>. The  
34  
35 310 NAFLD patients observed by Nasr et al. actually belonged to the NASH category, because they  
36  
37 311 suffered from fibrosis and elevated ALT and/or AST levels. As our study was based on  
38  
39 312 examinations of healthy, liver biopsy is not justifiable. Very likely, the current cohort included  
40  
41 313 a portion of NASH patients. They also did not show significant progression towards cirrhosis  
42  
43 314 or HCC was monitored.

44  
45 315  
46  
47 316 In contrast to hepatic complications, patients with NAFLD showed a significant risk for the  
48  
49 317 development of extrahepatic diseases, including diabetes, hypertension and hyperuricemia. In  
50  
51 318 696 NAFLD patients, eleven years witnessed the development of 86 cases (12.4%) type II  
52  
53 319 diabetes, 276 (40%) cases of hypertension and 115 patients with (16.5%) hyperuricemia,  
54  
55 320 respectively. Interestingly, in 222 NASH patients, the prevalence of these three diseases was  
56  
57 321 12 (5.4%), 46 (20.7%), and 33 (14.9%) only. In general, men had a higher probability to develop  
58  
59 322 these diseases than women. These results are consistent with previous reports from USA and  
60  
61 323 Europe <sup>[16-18]</sup>. Whether NAFLD is associated with the risk of severe heart or brain diseases  
62  
63 324 such as acute myocardial infarction (AMI) and stroke is worth further investigation. A recent  
64  
65 325 matched cohort study analyzed databases from four European countries, which included 17.7  
66  
67 326 million patients with NAFLD or NASH <sup>[19]</sup>. These patients had a mean follow-up of 2.1 to 5.5  
68  
69 327 years. The study showed that the diagnosis of NAFLD appears not to be associated with AMI

1  
2  
3 328 or stroke risk after adjustment for established cardiovascular risk factors. Nevertheless, the  
4  
5 329 authors mentioned that cardiovascular risk assessment in adults with a diagnosis of NAFLD is  
6  
7 330 important [19]. Follow-up for 5 years might be not sufficient to reach a conclusion for this issue.  
8  
9 331

10 332 An important issue is the cause-and-effect relationship between NAFLD and its clinical  
11  
12 333 outcomes such as diabetes, hypertension and hyperuricemia. A dynamic Bayesian network in  
13  
14 334 the current study provides direct evidence on this issue: NAFLD directly results in alterations  
15  
16 335 of several parameters, including DBp, SBp and UA, suggesting that NAFLD directly  
17  
18 336 contributes to the occurrence of hypertension and hyperuricemia. The underlying mechanisms  
19  
20 337 require further investigation.

21 338 The current dynamic Bayesian network analysis does not confirm a direct cause-and-  
22  
23 339 effect relationship between NAFLD and type 2 diabetes mellitus. There are plenty of studies  
24  
25 340 showing the close relationship between type 2 diabetes and NAFLD [20]. Pathophysiologically,  
26  
27 341 insulin resistance is a key event in both NAFLD and diabetes progression [20]. However,  
28  
29 342 genome-wide association studies have not yet identified the exact impact of insulin resistance  
30  
31 343 on the variants associated with NAFLD severity [20,21]. Clarification of the cause-and-effect  
32  
33 344 relationship between NAFLD and diabetes requires further long-term follow-up studies.

34 345  
35 346 To date, there are a large number of studies investigating risk factors for NAFLD [22]. These  
36  
37 347 studies tried to identify single, or multiple combined biomarkers to predict NAFLD occurrence.  
38  
39 348 Given that most studies were based on cross-sectional designs, or with only short follow-up  
40  
41 349 periods, it is difficult to clarify the causality between the proposed predictors and NAFLD  
42  
43 350 morbidity. Our eleven-year dataset provides a chance to shed led on this issue. Here, the  
44  
45 351 dynamic causal relationships between variables, including risk parameters and clinical  
46  
47 352 outcomes, were identified by a first order Markov model, which was displayed by a dynamic  
48  
49 353 Bayes network. The dynamic Bayes model discriminates causal relationship through time  
50  
51 354 sequence. When a variable change is closely related to a previous variance alteration, a causal  
52  
53 355 relationship between the two variables is assumed. Based on Logistic and Cox regression and  
54  
55 356 dynamic Bayesian network analyses, we confirmed three direct risk factors for NAFLD  
56  
57 357 occurrence: gender, BMI and TG. These findings are supported by the following data: (1) Men  
58  
59 358 have higher NAFLD prevalence than women in this population (37% *versus* 22.2% in 2016);  
60  
359 (2) In overweight people with a BMI >25, NAFLD prevalence reached 69% in males and 59.2%  
360 in females. Given that triglycerides are a major energy source, but are leading to obesity, it is



1  
2  
3 361 not surprising that this parameter directly reflects the risk for NAFLD development. These  
4  
5 362 findings provide robust evidence supporting the use of BMI to monitor or predict NAFLD.

6 363

7  
8 364

9  
10 365 **Conclusion**

11 366 This 11-year follow-up study documents the rapid increase in NAFLD prevalence in an Eastern  
12  
13 367 Chinese population. In contrast to previous reports, our observation does not observe that one  
14  
15 368 decade of NAFLD is sufficient to lead to severe hepatic clinical outcomes. It is worthy to note  
16  
17 369 that our population were biased because they are on the well-off, well-educated side of the  
18  
19 370 Chinese people, while previous studies were often based on hospital populations, who suffered  
20  
21 371 from negative selection bias and thus came up with higher estimates. In addition, given there  
22  
23 372 are differences in NAFLD profiles between Eastern and Western populations, it would be  
24  
25 373 interesting to know the natural development of NAFLD in a Western population. A key point  
26  
27 374 for clarifying the true history of NAFLD is to follow a population starting from the early phases  
28  
29 375 of the disease. Consistent with previous studies, NAFLD is tightly associated with multiple  
30  
31 376 extra-hepatic diseases relevant to the metabolic syndrome. In the future, follow-up of the  
32  
33 377 current cohort for another one and two decades will provide further valuable data to clarify the  
34  
35 378 extended natural history of NAFLD. Last but not least, a large portion of the men and women  
36  
37 379 in this study were educated above the average and have a position in the company that gave  
38  
39 380 them the availability of better food choices as well as regular sport. On the other hand, the  
40  
41 381 relatively low sensitivity of ultrasound for the detection of liver fat might underestimate the  
42  
43 382 incidence of NAFLD in this cohort.

44 383

45 384 **Contributorship:**

46 385 Conception and design: Xiaoping Tang, Yanyan Shi, Juan Du, Hong-Lei Weng, Jinzhu Jia  
47  
48 386 and Tong Huang

49 387 Ultrasonography: Lan Chen, Fujun Li

50 388 Blood assays: Yanming Zhang and Huier Zhang

51  
52 389 Other examinations and data collection: Xiaoping Tang, Keming Hu, Tingting Zhou, Juan Du,  
53  
54 390 Zhongwei Zhu and Tong Huang

55  
56 391 Statistical analyses: Yanyan Shi and Jinzhu Jia

57  
58 392 Drafting the article: Hong-Lei Weng

1  
2  
3 393 Reviewing and editing the article critically: Xiaoping Tang, Yanyan Shi, Christoph Meyer,  
4  
5 394 Roman Liebe, Steven Dooley, Hong-Lei Weng, Jinzhu Jia and Tong Huang  
6  
7  
8 395

9 396 **Funding Statement**

11 397 The project is supported by National Key R&D Program of China (2017YFC0908103).  
12  
13 398

14 399 **Competing of Interests**

16 400 The authors declare that there is no conflict of interest.  
17  
18 401

19 402 **Ethics approval**

21 403 The study protocol was approved by the Ethics Committee of Zhenhai Lianhua Hospital No.  
22 404 2016(001). Informed consent was obtained from all subjects.  
23  
24 405

26 406 **Data sharing**

28 407 All data relevant to the study are included in the article or uploaded as supplementary  
29 408 information.  
30  
31 409

32 410 **References**

- 35 411 [1] Younossi ZM, Tampi R, Priyadarshini M, et al. Burden of Illness and Economic Model  
36 412 for Patients With Nonalcoholic Steatohepatitis in the United States. *Hepatology*, 2019,  
37 413 69: 564-572.  
38  
39 414 [2] Younossi ZM, Loomba R, Anstee QM, et al. Diagnostic modalities for nonalcoholic  
40 415 fatty liver disease, nonalcoholic steatohepatitis, and associated fibrosis. *Hepatology*,  
41 416 2018, 68: 349-360.  
42 417 [3] Fan JG, Kim SU, Wong VW. New trends on obesity and NAFLD in Asia. *J Hepatol*,  
43 418 2017, 67: 862-873.  
44 419 [4] Byrne CD, Targher G. NAFLD: a multisystem disease. *J Hepatol*, 2015, 62: S47-64.  
45 420 [5] Alexander M, Loomis AK, van der Lei J, et al. Risks and clinical predictors of cirrhosis  
46 421 and hepatocellular carcinoma diagnoses in adults with diagnosed NAFLD: real-world  
47 422 study of 18 million patients in four European cohorts. *BMC Med*, 2019, 17: 95.  
48  
49 423 [6] Zhou F, Zhou J, Wang W, et al. Unexpected Rapid Increase in the Burden of NAFLD  
50 424 in China From 2008 to 2018: A Systematic Review and Meta-Analysis. *Hepatology*,  
51 425 2019, 70: 1119-1133.  
52 426 [7] EASL-EASD-EASO Clinical Practice Guidelines for the management of non-alcoholic  
53 427 fatty liver disease. *J Hepatol*, 2016, 64: 1388-1402.  
54  
55 428 [8] Chalasani N, Younossi Z, Lavine JE, et al. The diagnosis and management of  
56 429 nonalcoholic fatty liver disease: Practice guidance from the American Association for  
57 430 the Study of Liver Diseases. *Hepatology*, 2018, 67: 328-357.  
58 431 [9] Younossi Z, Tacke F, Arrese M, et al. Global Perspectives on Nonalcoholic Fatty Liver  
59 432 Disease and Nonalcoholic Steatohepatitis. *Hepatology*, 2019, 69: 2672-2682.

- 1  
2  
3 433 [10] Younossi ZM, Koenig AB, Abdelatif D, et al. Global epidemiology of nonalcoholic  
4 434 fatty liver disease-Meta-analytic assessment of prevalence, incidence, and outcomes.  
5 435 Hepatology, 2016, 64: 73-84.  
6 436 [11] Shen F, Zheng RD, Shi JP, et al. Impact of skin capsular distance on the performance  
7 437 of controlled attenuation parameter in patients with chronic liver disease. Liver Int,  
8 438 2015, 35: 2392-2400.  
9 439 [12] Ascha MS, Hanouneh IA, Lopez R, et al. The incidence and risk factors of  
10 440 hepatocellular carcinoma in patients with nonalcoholic steatohepatitis. Hepatology,  
11 441 2010, 51: 1972-1978.  
12 442 [13] Younossi ZM, Otgonsuren M, Henry L, et al. Association of nonalcoholic fatty liver  
13 443 disease (NAFLD) with hepatocellular carcinoma (HCC) in the United States from 2004  
14 444 to 2009. Hepatology, 2015, 62: 1723-1730.  
15 445 [14] White DL, Kanwal F, El-Serag HB. Association between nonalcoholic fatty liver  
16 446 disease and risk for hepatocellular cancer, based on systematic review. Clin  
17 447 Gastroenterol Hepatol, 2012, 10: 1342-1359.e1342.  
18 448 [15] Nasr P, Ignatova S, Kechagias S, et al. Natural history of nonalcoholic fatty liver  
19 449 disease: A prospective follow-up study with serial biopsies. Hepatol Commun, 2018, 2:  
20 450 199-210.  
21 451 [16] Estes C, Razavi H, Loomba R, et al. Modeling the epidemic of nonalcoholic fatty liver  
22 452 disease demonstrates an exponential increase in burden of disease. Hepatology, 2018,  
23 453 67: 123-133.  
24 454 [17] Williamson RM, Price JF, Glancy S, et al. Prevalence of and risk factors for hepatic  
25 455 steatosis and nonalcoholic Fatty liver disease in people with type 2 diabetes: the  
26 456 Edinburgh Type 2 Diabetes Study. Diabetes Care, 2011, 34: 1139-1144.  
27 457 [18] Targher G, Bertolini L, Padovani R, et al. Prevalence of nonalcoholic fatty liver disease  
28 458 and its association with cardiovascular disease among type 2 diabetic patients. Diabetes  
29 459 Care, 2007, 30: 1212-1218.  
30 460 [19] Alexander M, Loomis AK, van der Lei J, et al. Non-alcoholic fatty liver disease and risk  
31 461 of incident acute myocardial infarction and stroke: findings from matched cohort study  
32 462 of 18 million European adults. Bmj, 2019, 367: 15367.  
33 463 [20] Tilg H, Moschen AR, Roden M. NAFLD and diabetes mellitus. Nat Rev Gastroenterol  
34 464 Hepatol, 2017, 14: 32-42.  
35 465 [21] Zhou Y, Llauradó G, Orešič M, et al. Circulating triacylglycerol signatures and insulin  
36 466 sensitivity in NAFLD associated with the E167K variant in TM6SF2. J Hepatol, 2015,  
37 467 62: 657-663.  
38 468 [22] Miyake T, Kumagi T, Furukawa S, et al. Non-alcoholic fatty liver disease: factors  
39 469 associated with its presence and onset. J Gastroenterol Hepatol, 2013, 28 Suppl 4: 71-  
40 470 78.  
41 471  
42 472  
43 473

### Figure legends

474 **Figure 1.** Flow chart depicting the enrollment of a population with non-alcoholic fatty liver  
475 disease (NAFLD) for follow-up in Ningbo Zhenhai Lianhua Hospital, China.  
476

477 **Figure 2.** Penalized logistic regression and Cox regression analysis were performed for risk  
478 factors and hazard ratios of non-alcoholic fatty liver disease (NAFLD). The following  
479 parameters were available from 5606 participants: Gender, age, BMI, albumin, white globulin

1  
2  
3 480 ratio (WGR), white blood cell (WBC), low density lipoprotein (LDL), triglycerides (TG), high  
4  
5 481 density lipoprotein (HDL), glutamyl transpeptidase (GLT), alanine transaminase (ALT),  
6  
7 482 aspartate transaminase (AST), creatinine (Cr), alkaline phosphatase (ALP), blood urea nitrogen  
8  
9 483 (Bun), Uric Acid (UA), blood glucose (Glu), systolic blood pressure (SBp), diastolic blood  
10  
11 484 pressure (DBp), blood sedimentation (ESR), hemoglobin (HGB), platelets (PLT),  
12  
13 485 Apolipoprotein A1 (ApoA1), Apolipoprotein B2 (ApoB), total bilirubin (TB), total protein  
14  
15 486 (TP). Cross validation selected 16 variables to be potential predictors. The corresponding  
16  
17 487 forest-plot is shown in (A). The AUC of these above 16 variables for NAFLD is 0.88 (B). Cox  
18  
19 488 regression confirmed that the 16 variables were relevant for NAFLD incidence, including BMI,  
20  
21 489 albumin, WBC, TG, HDL, GLT, ALT, Cr, UA, Glu, SBp, DBp, ESR, HGB, PLT and ApoB.  
22  
23 490 The corresponding forest-plot is shown (C).

24 491  
25  
26 492 **Figure 3.** Dynamic Bayesian network analyses were performed to show the cause-effect link  
27  
28 493 between non-alcoholic fatty liver disease (NAFLD) and its potential risk factors. Three  
29  
30 494 variables, BMI, gender and triglycerides directly pointed to NAFLD. ApoB impacted on the  
31  
32 495 incidence of NAFLD through TG abundance. LDL indirectly contributed to NAFLD through  
33  
34 496 ApoB. NAFLD directly led to alterations of seven clinical parameters: ALT, DBp, SBp, TP,  
35  
36 497 albumin, HGB and UA.

37  
38  
39  
40  
41  
42  
43  
44  
45  
46  
47  
48  
49  
50  
51  
52  
53  
54  
55  
56  
57  
58  
59  
60

500 **Table 1.** Prevalence of NAFLD in 5606 persons with 11-year follow-up (2006-2016)

|                  | 2006 | 2007 | 2008 | 2009 | 2010 | 2011 | 2012 | 2013 | 2014 | 2015 | 2016 |
|------------------|------|------|------|------|------|------|------|------|------|------|------|
| <b>Total (n)</b> | 5606 | 5606 | 5606 | 5606 | 5606 | 5606 | 5606 | 5606 | 5606 | 5606 | 5606 |
| NAFLD            |      |      |      |      |      |      |      |      |      |      |      |
| (n)              | 951  | 1068 | 1247 | 1322 | 1378 | 1466 | 1524 | 1574 | 1700 | 1883 | 1976 |
| (%)              | 17   | 19.1 | 22.2 | 23.6 | 24.6 | 26.2 | 27.2 | 28.1 | 30.3 | 33.6 | 35.2 |
| <b>Male (n)</b>  | 3795 | 3795 | 3795 | 3795 | 3795 | 3795 | 3795 | 3795 | 3795 | 3795 | 3795 |
| NAFLD            |      |      |      |      |      |      |      |      |      |      |      |
| (n)              | 776  | 871  | 1014 | 1075 | 1117 | 1206 | 1244 | 1283 | 1387 | 1517 | 1569 |
| (%)              | 20.4 | 23   | 26.7 | 28.3 | 29.4 | 31.8 | 32.8 | 33.8 | 36.5 | 40   | 41.3 |
| ≤ 30ys           |      |      |      |      |      |      |      |      |      |      |      |
| (n)              | 668  | 466  | 366  | 297  | 246  | 204  | 142  | 67   | 14   | 4    | 0    |
| NAFLD            |      |      |      |      |      |      |      |      |      |      |      |
| (n)              | 97   | 71   | 57   | 46   | 35   | 35   | 30   | 17   | 3    | 1    | 0    |
| (%)              | 14.5 | 15.2 | 15.6 | 15.5 | 14.2 | 17.2 | 21.1 | 25.4 | 21.4 | 25   | 0    |
| >30, ≤           |      |      |      |      |      |      |      |      |      |      |      |
| 40ys (n)         | 1212 | 1315 | 1342 | 1258 | 1180 | 1091 | 1034 | 981  | 896  | 778  | 668  |
| NAFLD            |      |      |      |      |      |      |      |      |      |      |      |
| (n)              | 231  | 286  | 349  | 349  | 338  | 330  | 330  | 331  | 331  | 301  | 261  |
| (%)              | 19.1 | 21.7 | 26   | 27.7 | 28.6 | 30.2 | 31.9 | 33.7 | 36.9 | 38.7 | 39.1 |
| >40, ≤           |      |      |      |      |      |      |      |      |      |      |      |
| 50ys (n)         | 873  | 863  | 842  | 928  | 988  | 1022 | 1097 | 1128 | 1170 | 1201 | 1212 |
| NAFLD            |      |      |      |      |      |      |      |      |      |      |      |
| (n)              | 211  | 215  | 239  | 278  | 314  | 353  | 388  | 411  | 454  | 524  | 525  |
| (%)              | 24.2 | 24.9 | 28.4 | 30   | 31.8 | 34.5 | 35.4 | 36.4 | 38.8 | 43.6 | 43.3 |
| >50, ≤           |      |      |      |      |      |      |      |      |      |      |      |
| 60ys (n)         | 562  | 623  | 696  | 741  | 776  | 826  | 796  | 798  | 820  | 851  | 873  |
| NAFLD            |      |      |      |      |      |      |      |      |      |      |      |
| (n)              | 143  | 184  | 231  | 262  | 276  | 314  | 292  | 286  | 320  | 363  | 409  |
| (%)              | 25.4 | 29.5 | 33.2 | 35.4 | 35.6 | 38   | 36.7 | 35.8 | 39   | 42.7 | 46.8 |
| >60, ≤           |      |      |      |      |      |      |      |      |      |      |      |
| 70ys (n)         | 368  | 382  | 373  | 348  | 346  | 356  | 398  | 465  | 496  | 521  | 562  |
| NAFLD            |      |      |      |      |      |      |      |      |      |      |      |
| (n)              | 73   | 85   | 97   | 95   | 96   | 108  | 125  | 156  | 178  | 210  | 238  |
| (%)              | 19.8 | 22.3 | 26   | 27.3 | 27.7 | 30.3 | 31.4 | 33.5 | 35.9 | 40.3 | 42.3 |
| >70ys            |      |      |      |      |      |      |      |      |      |      |      |
| (n)              | 112  | 146  | 176  | 223  | 259  | 296  | 328  | 356  | 399  | 440  | 480  |
| NAFLD            |      |      |      |      |      |      |      |      |      |      |      |
| (n)              | 21   | 30   | 41   | 45   | 58   | 66   | 79   | 82   | 101  | 118  | 136  |
| (%)              | 18.8 | 20.5 | 23.3 | 20.2 | 22.4 | 22.3 | 24.1 | 23   | 25.3 | 26.8 | 28.3 |
| <b>Female</b>    |      |      |      |      |      |      |      |      |      |      |      |
| (n)              | 1811 | 1811 | 1811 | 1811 | 1811 | 1811 | 1811 | 1811 | 1811 | 1811 | 1811 |
| NAFLD            |      |      |      |      |      |      |      |      |      |      |      |
| (n)              | 175  | 197  | 233  | 247  | 261  | 260  | 280  | 291  | 313  | 366  | 407  |
| (%)              | 9.7  | 10.9 | 12.9 | 13.6 | 14.4 | 14.4 | 15.5 | 16.1 | 17.3 | 20.2 | 22.5 |
| ≤ 30ys           |      |      |      |      |      |      |      |      |      |      |      |
| (n)              | 85   | 44   | 22   | 13   | 9    | 9    | 5    | 2    | 0    | 0    | 0    |
| NAFLD            |      |      |      |      |      |      |      |      |      |      |      |
| (n)              | 3    | 1    | 1    | 1    | 0    | 0    | 0    | 0    | 0    | 0    | 0    |
| (%)              | 3.5  | 2.3  | 4.5  | 7.7  | 0    | 0    | 0    | 0    | 0    | 0    | 0    |
| >30, ≤           |      |      |      |      |      |      |      |      |      |      |      |
| 40ys (n)         | 582  | 578  | 541  | 480  | 403  | 334  | 277  | 213  | 173  | 124  | 85   |
| NAFLD            |      |      |      |      |      |      |      |      |      |      |      |
| (n)              | 17   | 21   | 25   | 22   | 24   | 18   | 18   | 13   | 15   | 14   | 12   |
| (%)              | 2.9  | 3.6  | 4.6  | 4.6  | 6    | 5.4  | 6.5  | 6.1  | 8.7  | 11.3 | 14.1 |
| >40, ≤           |      |      |      |      |      |      |      |      |      |      |      |
| 50ys (n)         | 485  | 469  | 482  | 496  | 541  | 580  | 612  | 638  | 617  | 608  | 582  |
| NAFLD            |      |      |      |      |      |      |      |      |      |      |      |
| (n)              | 31   | 31   | 35   | 41   | 47   | 54   | 61   | 66   | 65   | 81   | 86   |
| (%)              | 6.4  | 6.6  | 7.3  | 8.3  | 8.7  | 9.3  | 10   | 10.3 | 10.5 | 13.3 | 14.8 |
| >50, ≤           |      |      |      |      |      |      |      |      |      |      |      |
| 60ys (n)         | 365  | 400  | 422  | 450  | 461  | 469  | 456  | 452  | 467  | 476  | 485  |
| NAFLD            |      |      |      |      |      |      |      |      |      |      |      |
| (n)              | 56   | 67   | 85   | 86   | 90   | 88   | 88   | 83   | 88   | 98   | 109  |
| (%)              | 15.3 | 16.8 | 20.1 | 19.1 | 19.5 | 18.8 | 19.3 | 18.4 | 18.8 | 20.6 | 22.5 |
| >60, ≤           |      |      |      |      |      |      |      |      |      |      |      |
| 70ys (n)         | 244  | 260  | 262  | 267  | 266  | 266  | 280  | 301  | 314  | 337  | 365  |
| NAFLD            |      |      |      |      |      |      |      |      |      |      |      |
| (n)              | 54   | 62   | 61   | 66   | 69   | 66   | 70   | 81   | 82   | 104  | 116  |
| (%)              | 22.1 | 23.8 | 23.3 | 24.7 | 25.9 | 24.8 | 25   | 26.9 | 26.1 | 30.9 | 31.8 |
| >70ys            |      |      |      |      |      |      |      |      |      |      |      |
| (n)              | 50   | 60   | 82   | 105  | 131  | 153  | 181  | 205  | 240  | 266  | 294  |
| NAFLD            |      |      |      |      |      |      |      |      |      |      |      |
| (n)              | 14   | 15   | 26   | 31   | 31   | 34   | 43   | 48   | 63   | 69   | 84   |
| (%)              | 28   | 25   | 31.7 | 29.5 | 23.7 | 22.2 | 23.8 | 23.4 | 26.3 | 25.9 | 28.6 |

501

502  
503**Table 2.** Clinical outcome of NAFLD patients  
**2006 - 2016**

|                                           |                         | Cirrhosis | HCC | Diabetes<br>n (%) |         | Hypertension<br>n (%) |         | Hyperuricemia<br>n (%) |         |
|-------------------------------------------|-------------------------|-----------|-----|-------------------|---------|-----------------------|---------|------------------------|---------|
| Male<br>(n=506)                           |                         | 0         | 0   | 64 (12.6)         |         | 191 (37.7)            |         | 72 (14.2)              |         |
| Female (n=190)                            |                         | 0         | 0   | 22 (11.6)         |         | 85 (44.7)             |         | 43 (22.6)              |         |
| <b>2007 – 2016 (outcome of new NFLAD)</b> |                         |           |     |                   |         |                       |         |                        |         |
|                                           |                         | Cirrhosis | HCC | Diabetes          |         | Hypertension          |         | Hyperuricemia          |         |
|                                           |                         |           |     | n (%)             | P-value | n (%)                 | P-value | n (%)                  | P-value |
| Male                                      | NAFLD<br>n=138          | 0         | 0   | 14<br>(10.1)      | 0.028   | 47(34.1)              | < 0.001 | 34 (24.6)              | < 0.001 |
|                                           | Non-<br>NAFLD<br>n=2786 | 0         | 0   | 157<br>(5.6)      |         | 259 (9.3)             |         | 284 (10.2)             |         |
| Female                                    | NAFLD<br>n=47           | 0         | 0   | 5 (10.6)          | 0.014   | 21 (44.7)             | < 0.001 | 8 (17)                 | < 0.001 |
|                                           | Non-<br>NAFLD<br>n=1761 | 0         | 0   | 54 (3.1)          |         | 324<br>(18.4)         |         | 84 (4.8)               |         |

504  
505

1  
2  
3  
4  
5  
6  
7  
8  
9  
10  
11  
12  
13  
14  
15  
16  
17  
18  
19  
20  
21  
22  
23  
24  
25  
26  
27  
28  
29  
30  
31  
32  
33  
34  
35  
36  
37  
38  
39  
40  
41  
42  
43  
44  
45  
46  
47  
48  
49  
50  
51  
52  
53  
54  
55  
56  
57  
58  
59  
60

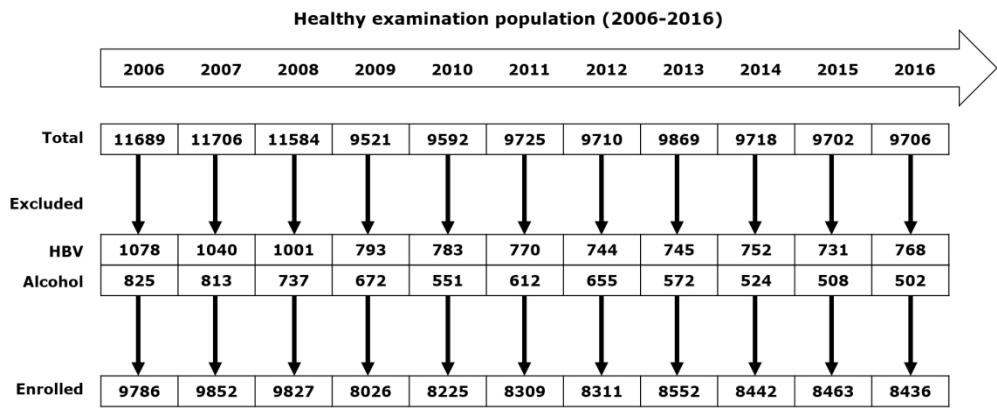

335x136mm (150 x 150 DPI)

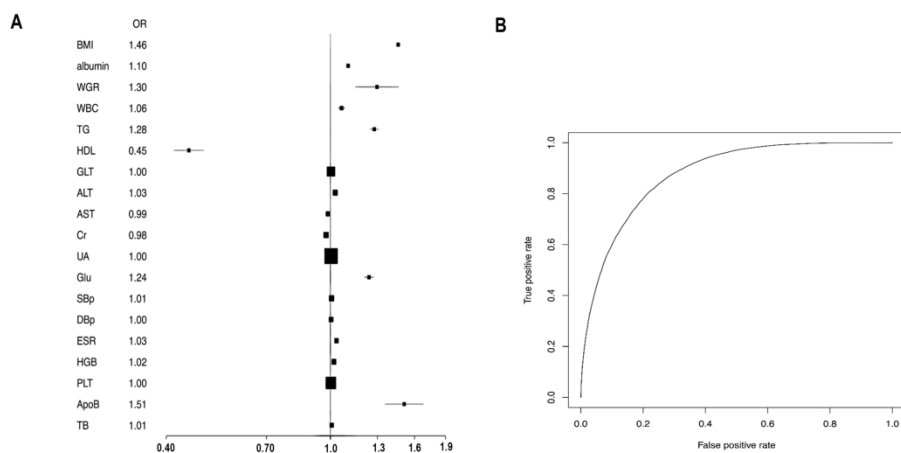

Figure 2

122x63mm (600 x 600 DPI)



1  
2  
3  
4  
5  
6  
7  
8  
9  
10  
11  
12  
13  
14  
15  
16  
17  
18  
19  
20  
21  
22  
23  
24  
25  
26  
27  
28  
29  
30  
31  
32  
33  
34  
35  
36  
37  
38  
39  
40  
41  
42  
43  
44  
45  
46  
47  
48  
49  
50  
51  
52  
53  
54  
55  
56  
57  
58  
59  
60

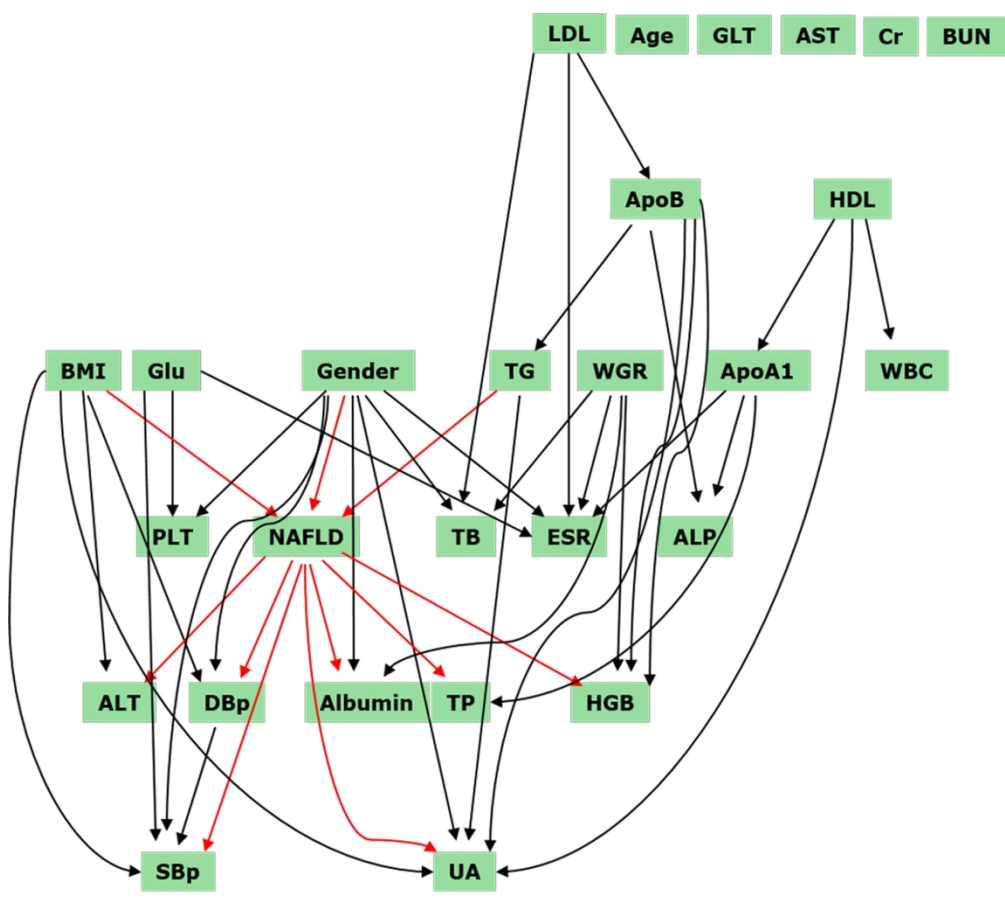

522x461mm (96 x 96 DPI)

1  
2  
3 **Nonalcoholic fatty liver disease increased risk of metabolic diseases, but not severe liver**  
4 **disease: an eleven-year follow-up study**  
5

6 Xiaoping Tang, Yanyan Shi, Juan Du, Keming Hu, Tingting Zhou, Lan Chen, Yanming  
7 Zhang, Fujun Li, Huier Zhang, Roman Liebe, Christoph Meyer, Steven Dooley, Zhongwei  
8 Zhu, Hong-Lei Weng, Jinzhu Jia, Tong Huang  
9  
10  
11  
12  
13  
14  
15  
16  
17  
18  
19  
20  
21  
22  
23  
24  
25  
26  
27  
28  
29  
30  
31  
32  
33  
34  
35  
36  
37  
38  
39  
40  
41  
42  
43  
44  
45  
46  
47  
48  
49  
50  
51  
52  
53  
54  
55  
56  
57  
58  
59  
60

For peer review only

**Supplementary Table 1.** Parameters measured in the annual health examinations.

|                                                 |
|-------------------------------------------------|
| Age                                             |
| Albumin                                         |
| AKP (alkaline phosphatase)                      |
| ALT ( alanine transaminase)                     |
| ApoA1 (Apolipoprotein A1)                       |
| ApoB (Apolipoprotein B2)                        |
| AST (aspartate transaminase)                    |
| BMI (Body mass index)                           |
| BLRV (whole blood low shear reduced viscosity)  |
| BLRI (relative index of whole blood low shear)  |
| BHRV (whole blood high shear reduced viscosity) |
| BHRI (relative index of whole blood high shear) |
| BVV200 (Whole blood viscosity value)            |
| BUN (blood urea nitrogen)                       |
| BUS (ultrasound prompt)                         |
| CRP (high sensitive C-reactive protein)         |
| Cr (creatinine)                                 |
| CA (carotid atherosclerosis )                   |
| DBIL (Direct bilirubin)                         |
| DBp (diastolic blood pressure)                  |
| DM (type II diabetes)                           |
| ESR (Blood sedimentation)                       |
| ESRKV (Blood sedimentation equation K value)    |
| Gender                                          |
| GLT (glutamyl transpeptidase)                   |
| Glucose                                         |
| HBP (Hypertension)                              |
| HBX (red blood cell deformation index TK)       |
| HCT (Hematocrit)                                |
| HCY (Homocysteine)                              |
| HDL (high density lipoprotein C)                |
| Height                                          |
| HGB (hemoglobin)                                |
| LDL (low density lipoprotein C)                 |
| LVH (left ventricular hypertrophy)              |
| MPV (mean platelet volume)                      |
| NAFLD (non-alcoholic fatty liver disease)       |
| PhyExa (physical examination results)           |
| PV (plasma viscosity)                           |
| PDW (Platelet distribution width)               |
| PLT (platelet)                                  |
| PCT ( prothrombin consumption time)             |
| RBC (red blood cell count)                      |
| SBp (systolic blood pressure)                   |
| TB (Total Bilirubin)                            |
| TC (Total cholesterol)                          |
| TG (Triglyceride)                               |

|    |                              |
|----|------------------------------|
| 1  |                              |
| 2  |                              |
| 3  | TP (total protein)           |
| 4  | UA (uric acid)               |
| 5  | Waist                        |
| 6  | Weight                       |
| 7  |                              |
| 8  | WGR (white globulin ratio)   |
| 9  | WBC (white blood cell count) |
| 10 |                              |
| 11 |                              |
| 12 |                              |
| 13 |                              |
| 14 |                              |
| 15 |                              |
| 16 |                              |
| 17 |                              |
| 18 |                              |
| 19 |                              |
| 20 |                              |
| 21 |                              |
| 22 |                              |
| 23 |                              |
| 24 |                              |
| 25 |                              |
| 26 |                              |
| 27 |                              |
| 28 |                              |
| 29 |                              |
| 30 |                              |
| 31 |                              |
| 32 |                              |
| 33 |                              |
| 34 |                              |
| 35 |                              |
| 36 |                              |
| 37 |                              |
| 38 |                              |
| 39 |                              |
| 40 |                              |
| 41 |                              |
| 42 |                              |
| 43 |                              |
| 44 |                              |
| 45 |                              |
| 46 |                              |
| 47 |                              |
| 48 |                              |
| 49 |                              |
| 50 |                              |
| 51 |                              |
| 52 |                              |
| 53 |                              |
| 54 |                              |
| 55 |                              |
| 56 |                              |
| 57 |                              |
| 58 |                              |
| 59 |                              |
| 60 |                              |

For peer review only

**Supplementary Table 2.** Prevalence of NAFLD in an eastern Chinese population (2006-2016)

|                   | 2006 | 2007 | 2008 | 2009 | 2010 | 2011 | 2012 | 2013 | 2014 | 2015 | 2016 |
|-------------------|------|------|------|------|------|------|------|------|------|------|------|
| <b>Total (n)</b>  | 9786 | 9852 | 9827 | 8026 | 8225 | 8309 | 8311 | 8552 | 8442 | 8463 | 8436 |
| NAFLD (n)         | 1687 | 1875 | 2161 | 1797 | 1871 | 1943 | 2033 | 2169 | 2356 | 2610 | 2734 |
| (%)               | 17.2 | 19.0 | 22.0 | 22.4 | 22.7 | 23.4 | 24.5 | 25.4 | 27.9 | 30.8 | 32.4 |
| <b>Male (n)</b>   | 6834 | 6872 | 6857 | 5468 | 5640 | 5692 | 5680 | 5891 | 5820 | 5812 | 5816 |
| NAFLD (n)         | 1399 | 1555 | 1790 | 1419 | 1488 | 1562 | 1616 | 1734 | 1896 | 2081 | 2152 |
| (%)               | 20.5 | 22.6 | 26.1 | 26.0 | 26.4 | 27.4 | 28.5 | 29.4 | 32.6 | 35.8 | 37.0 |
| ≤ 30ys (n)        | 1196 | 938  | 729  | 826  | 980  | 1092 | 1068 | 1163 | 1013 | 964  | 927  |
| NAFLD (n)         | 155  | 112  | 100  | 78   | 83   | 94   | 108  | 157  | 171  | 208  | 200  |
| (%)               | 13.0 | 11.9 | 13.7 | 9.4  | 8.5  | 8.6  | 10.1 | 13.5 | 16.9 | 21.6 | 21.6 |
| >30, ≤ 40ys (n)   | 2144 | 2292 | 2353 | 1504 | 1395 | 1248 | 1150 | 1096 | 1028 | 970  | 953  |
| NAFLD (n)         | 419  | 502  | 590  | 412  | 386  | 375  | 358  | 367  | 372  | 357  | 344  |
| (%)               | 19.5 | 21.9 | 25.1 | 27.4 | 27.7 | 30.0 | 31.1 | 33.5 | 36.2 | 36.8 | 36.1 |
| >40, ≤ 50ys (n)   | 1480 | 1465 | 1450 | 1107 | 1183 | 1211 | 1279 | 1299 | 1339 | 1360 | 1347 |
| NAFLD (n)         | 358  | 376  | 429  | 334  | 380  | 418  | 456  | 478  | 517  | 595  | 577  |
| (%)               | 24.2 | 25.7 | 29.6 | 30.2 | 32.1 | 34.5 | 35.7 | 36.8 | 38.6 | 43.8 | 42.8 |
| >50, ≤ 60ys (n)   | 1084 | 1180 | 1314 | 1033 | 1055 | 1068 | 1008 | 979  | 978  | 984  | 978  |
| NAFLD (n)         | 267  | 341  | 415  | 352  | 364  | 394  | 361  | 350  | 385  | 416  | 456  |
| (%)               | 24.6 | 28.9 | 31.6 | 34.1 | 34.5 | 36.9 | 35.8 | 35.8 | 39.4 | 42.3 | 46.6 |
| >60, ≤ 70ys (n)   | 635  | 655  | 622  | 553  | 547  | 574  | 632  | 774  | 834  | 879  | 937  |
| NAFLD (n)         | 137  | 147  | 165  | 151  | 159  | 172  | 202  | 243  | 292  | 331  | 382  |
| (%)               | 21.6 | 22.4 | 26.5 | 27.3 | 29.1 | 30.0 | 32.0 | 31.4 | 35.0 | 37.7 | 40.8 |
| >70ys (n)         | 295  | 342  | 389  | 445  | 480  | 499  | 543  | 580  | 628  | 655  | 674  |
| NAFLD (n)         | 63   | 77   | 91   | 92   | 116  | 109  | 131  | 139  | 159  | 174  | 193  |
| (%)               | 21.4 | 22.5 | 23.4 | 20.7 | 24.2 | 21.8 | 24.1 | 24.0 | 25.3 | 26.6 | 28.6 |
| <b>Female (n)</b> | 2952 | 2980 | 2970 | 2558 | 2585 | 2617 | 2631 | 2661 | 2622 | 2651 | 2620 |
| NAFLD (n)         | 288  | 320  | 371  | 378  | 383  | 381  | 417  | 435  | 460  | 529  | 582  |
| (%)               | 9.8  | 10.7 | 12.5 | 14.8 | 14.8 | 14.6 | 15.8 | 16.3 | 17.5 | 20.0 | 22.2 |
| ≤ 30ys (n)        | 209  | 167  | 147  | 143  | 213  | 251  | 248  | 270  | 239  | 244  | 214  |
| NAFLD (n)         | 5    | 4    | 4    | 1    | 0    | 1    | 2    | 8    | 9    | 14   | 13   |
| (%)               | 2.4  | 2.4  | 2.7  | 0.7  | 0.0  | 0.4  | 0.8  | 3.0  | 3.8  | 5.7  | 6.1  |
| >30, ≤ 40ys (n)   | 934  | 924  | 869  | 596  | 496  | 415  | 348  | 276  | 232  | 198  | 177  |
| NAFLD (n)         | 33   | 29   | 36   | 28   | 28   | 24   | 23   | 17   | 19   | 20   | 20   |
| (%)               | 3.5  | 3.1  | 4.1  | 4.7  | 5.6  | 5.8  | 6.6  | 6.2  | 8.2  | 10.1 | 11.3 |
| >40, ≤ 50ys (n)   | 801  | 785  | 776  | 627  | 666  | 701  | 733  | 754  | 707  | 704  | 658  |
| NAFLD (n)         | 54   | 60   | 63   | 62   | 69   | 76   | 85   | 88   | 84   | 98   | 99   |
| (%)               | 6.7  | 7.6  | 8.1  | 9.9  | 10.4 | 10.8 | 11.6 | 11.7 | 11.9 | 13.9 | 15.0 |
| >50, ≤ 60ys (n)   | 536  | 604  | 651  | 643  | 647  | 659  | 641  | 638  | 665  | 680  | 689  |
| NAFLD (n)         | 78   | 100  | 133  | 131  | 132  | 128  | 132  | 132  | 131  | 157  | 171  |
| (%)               | 14.6 | 16.6 | 20.4 | 20.4 | 20.4 | 19.4 | 20.6 | 20.7 | 19.7 | 23.1 | 24.8 |
| >60, ≤ 70ys (n)   | 367  | 368  | 367  | 358  | 347  | 347  | 380  | 417  | 438  | 461  | 494  |
| NAFLD (n)         | 94   | 96   | 92   | 99   | 95   | 92   | 106  | 117  | 123  | 140  | 159  |
| (%)               | 25.6 | 26.1 | 25.1 | 27.7 | 27.4 | 26.5 | 27.9 | 28.1 | 28.1 | 30.4 | 32.2 |
| >70ys (n)         | 105  | 132  | 160  | 191  | 216  | 244  | 281  | 306  | 341  | 364  | 388  |
| NAFLD (n)         | 24   | 31   | 43   | 57   | 59   | 60   | 69   | 73   | 94   | 100  | 120  |
| (%)               | 22.9 | 23.5 | 26.9 | 29.8 | 27.3 | 24.6 | 24.6 | 23.9 | 27.6 | 27.5 | 30.9 |

**Supplementary Table 3.** Prevalence of NAFLD in obese persons (BMI > 25) (2006-2016)

|                   | 2006 | 2007 | 2008 | 2009 | 2010 | 2011 | 2012 | 2013 | 2014 | 2015 | 2016 |
|-------------------|------|------|------|------|------|------|------|------|------|------|------|
| <b>Total (n)</b>  | 2445 | 2674 | 2749 | 2119 | 2314 | 2271 | 2218 | 2593 | 2159 | 2121 | 2106 |
| NAFLD             |      |      |      |      |      |      |      |      |      |      |      |
| (n)               | 1104 | 1256 | 1397 | 1103 | 1231 | 1218 | 1239 | 1387 | 1309 | 1384 | 1414 |
| (%)               | 45.2 | 47   | 50.8 | 52.1 | 53.2 | 53.6 | 55.9 | 53.5 | 60.6 | 65.3 | 67.1 |
| <b>Male (n)</b>   | 1927 | 2163 | 2232 | 1663 | 1822 | 1813 | 1744 | 2086 | 1728 | 1716 | 1699 |
| NAFLD             |      |      |      |      |      |      |      |      |      |      |      |
| (n)               | 912  | 1053 | 1180 | 885  | 1002 | 1001 | 1010 | 1153 | 1086 | 1147 | 1173 |
| (%)               | 47.3 | 48.7 | 52.9 | 53.2 | 55   | 55.2 | 57.9 | 55.3 | 62.8 | 66.8 | 69   |
| ≤ 30ys (n)        | 213  | 202  | 174  | 156  | 190  | 227  | 220  | 293  | 224  | 212  | 200  |
| NAFLD             |      |      |      |      |      |      |      |      |      |      |      |
| (n)               | 112  | 86   | 67   | 53   | 64   | 70   | 79   | 115  | 119  | 132  | 126  |
| (%)               | 52.6 | 42.6 | 38.5 | 34   | 33.7 | 30.8 | 35.9 | 39.2 | 53.1 | 62.3 | 63   |
| >30, ≤ 40ys (n)   | 549  | 640  | 689  | 427  | 428  | 375  | 346  | 407  | 310  | 302  | 291  |
| NAFLD             |      |      |      |      |      |      |      |      |      |      |      |
| (n)               | 269  | 325  | 388  | 259  | 250  | 229  | 226  | 247  | 229  | 211  | 206  |
| (%)               | 49   | 50.8 | 56.3 | 60.7 | 58.4 | 61.1 | 65.3 | 60.7 | 73.9 | 69.9 | 70.8 |
| >40, ≤ 50ys (n)   | 433  | 456  | 468  | 353  | 414  | 423  | 431  | 517  | 443  | 437  | 425  |
| NAFLD             |      |      |      |      |      |      |      |      |      |      |      |
| (n)               | 210  | 225  | 263  | 185  | 248  | 264  | 276  | 321  | 293  | 323  | 310  |
| (%)               | 48.5 | 49.3 | 56.2 | 52.4 | 59.9 | 62.4 | 64   | 62.1 | 66.1 | 73.9 | 72.9 |
| >50, ≤ 60ys (n)   | 351  | 447  | 491  | 364  | 390  | 392  | 353  | 381  | 312  | 309  | 303  |
| NAFLD             |      |      |      |      |      |      |      |      |      |      |      |
| (n)               | 173  | 240  | 280  | 222  | 236  | 247  | 209  | 226  | 207  | 217  | 232  |
| (%)               | 49.3 | 53.7 | 57   | 61   | 60.5 | 63   | 59.2 | 59.3 | 66.3 | 70.2 | 76.6 |
| >60, ≤ 70ys (n)   | 265  | 274  | 249  | 213  | 213  | 209  | 222  | 291  | 263  | 262  | 281  |
| NAFLD             |      |      |      |      |      |      |      |      |      |      |      |
| (n)               | 98   | 111  | 113  | 102  | 113  | 113  | 133  | 155  | 150  | 159  | 189  |
| (%)               | 37   | 40.5 | 45.4 | 47.9 | 53.1 | 54.1 | 59.9 | 53.3 | 57   | 60.7 | 67.3 |
| >70ys (n)         | 116  | 144  | 161  | 150  | 187  | 187  | 172  | 197  | 176  | 194  | 199  |
| NAFLD             |      |      |      |      |      |      |      |      |      |      |      |
| (n)               | 50   | 66   | 69   | 64   | 91   | 78   | 87   | 89   | 88   | 105  | 110  |
| (%)               | 43.1 | 45.8 | 42.9 | 42.7 | 48.7 | 41.7 | 50.6 | 45.2 | 50   | 54.1 | 55.3 |
| <b>Female (n)</b> | 518  | 511  | 517  | 456  | 492  | 458  | 474  | 507  | 431  | 405  | 407  |
| NAFLD             |      |      |      |      |      |      |      |      |      |      |      |
| (n)               | 192  | 203  | 217  | 218  | 229  | 217  | 229  | 234  | 223  | 237  | 241  |
| (%)               | 37.1 | 39.7 | 42   | 47.8 | 46.5 | 47.4 | 48.3 | 46.2 | 51.7 | 58.5 | 59.2 |
| ≤ 30ys (n)        | 15   | 5    | 11   | 9    | 6    | 12   | 13   | 15   | 13   | 14   | 16   |
| NAFLD             |      |      |      |      |      |      |      |      |      |      |      |
| (n)               | 3    | 1    | 2    | 0    | 0    | 1    | 2    | 5    | 5    | 5    | 7    |
| (%)               | 20   | 20   | 18.2 | 0    | 0    | 8.3  | 15.4 | 33.3 | 38.5 | 35.7 | 43.8 |
| >30, ≤ 40ys (n)   | 69   | 78   | 75   | 46   | 50   | 36   | 36   | 31   | 21   | 20   | 18   |
| NAFLD             |      |      |      |      |      |      |      |      |      |      |      |
| (n)               | 20   | 18   | 22   | 18   | 22   | 14   | 17   | 9    | 10   | 11   | 11   |
| (%)               | 29   | 23.1 | 29.3 | 39.1 | 44   | 38.9 | 47.2 | 29   | 47.6 | 55   | 61.1 |
| >40, ≤ 50ys (n)   | 101  | 107  | 109  | 83   | 90   | 88   | 94   | 115  | 89   | 76   | 66   |
| NAFLD             |      |      |      |      |      |      |      |      |      |      |      |
| (n)               | 37   | 41   | 41   | 34   | 36   | 39   | 44   | 48   | 45   | 46   | 35   |
| (%)               | 36.6 | 38.3 | 37.6 | 41   | 40   | 44.3 | 46.8 | 41.7 | 50.6 | 60.5 | 53   |
| >50, ≤ 60ys (n)   | 141  | 146  | 146  | 151  | 155  | 137  | 121  | 125  | 101  | 92   | 93   |
| NAFLD             |      |      |      |      |      |      |      |      |      |      |      |
| (n)               | 49   | 56   | 63   | 72   | 72   | 66   | 56   | 61   | 53   | 62   | 61   |
| (%)               | 34.8 | 38.4 | 43.2 | 47.7 | 46.5 | 48.2 | 46.3 | 48.8 | 52.5 | 67.4 | 65.6 |
| >60, ≤ 70ys (n)   | 141  | 127  | 115  | 103  | 115  | 105  | 120  | 127  | 109  | 105  | 105  |
| NAFLD             |      |      |      |      |      |      |      |      |      |      |      |
| (n)               | 64   | 66   | 58   | 59   | 65   | 59   | 68   | 67   | 57   | 63   | 66   |
| (%)               | 45.4 | 52   | 50.4 | 57.3 | 56.5 | 56.2 | 56.7 | 52.8 | 52.3 | 60   | 62.9 |
| >70ys (n)         | 51   | 48   | 61   | 64   | 76   | 80   | 90   | 94   | 98   | 98   | 109  |
| NAFLD             |      |      |      |      |      |      |      |      |      |      |      |
| (n)               | 19   | 21   | 31   | 35   | 34   | 38   | 42   | 44   | 53   | 50   | 61   |
| (%)               | 37.3 | 43.8 | 50.8 | 54.7 | 44.7 | 47.5 | 46.7 | 46.8 | 54.1 | 51   | 56   |

**Supplementary Table 4.** Logistic regression for risk factors of NAFLD

|             | Estimate | Std. Error | z value | OR       | 2.5%CI   | 97.5%CI  | Pr(> z )   |
|-------------|----------|------------|---------|----------|----------|----------|------------|
| (Intercept) | -21.63   | 0.3151     | -68.631 | 4.05E-10 | 2.18E-10 | 7.49E-10 | < 0.001*** |
| BMI         | 0.3791   | 0.005224   | 72.563  | 1.460966 | 1.446132 | 1.476054 | < 0.001*** |
| albumin     | 0.0994   | 0.005635   | 17.64   | 1.104513 | 1.092391 | 1.116791 | < 0.001*** |
| WGR         | 0.2666   | 0.06118    | 4.357   | 1.305464 | 1.157849 | 1.471676 | < 0.001*** |
| WBC         | 0.06149  | 0.008274   | 7.432   | 1.063423 | 1.046307 | 1.080801 | < 0.001*** |
| TG          | 0.2447   | 0.01213    | 20.17   | 1.277201 | 1.247335 | 1.308081 | < 0.001*** |
| HDL         | -0.7862  | 0.04247    | -18.511 | 0.45558  | 0.419127 | 0.495053 | < 0.001*** |
| GLT         | 0.002947 | 0.000358   | 8.242   | 1.002952 | 1.002255 | 1.003661 | < 0.001*** |
| ALT         | 0.02717  | 0.001056   | 25.738  | 1.027538 | 1.025425 | 1.029676 | < 0.001*** |
| AST         | -0.0142  | 0.001834   | -7.745  | 0.985896 | 0.982336 | 0.989418 | < 0.001*** |
| Cr          | -0.02375 | 0.001025   | -23.177 | 0.976528 | 0.974562 | 0.978485 | < 0.001*** |
| ALP         | 0.000909 | 0.000547   | 1.661   | 1.000909 | 0.999835 | 1.001982 | 0.09664    |
| UA          | 0.00433  | 0.000176   | 24.542  | 1.004339 | 1.003992 | 1.004687 | < 0.001*** |
| Glu         | 0.2159   | 0.01197    | 18.044  | 1.241037 | 1.212327 | 1.270567 | < 0.001*** |
| SBp         | 0.006338 | 0.001014   | 6.252   | 1.006358 | 1.00436  | 1.008359 | < 0.001*** |
| DBp         | 0.003561 | 0.001546   | 2.303   | 1.003567 | 1.000532 | 1.006614 | 0.021265*  |
| ESR         | 0.03401  | 0.001808   | 18.808  | 1.034593 | 1.030931 | 1.038265 | < 0.001*** |
| HGB         | 0.01966  | 0.00121    | 16.252  | 1.019853 | 1.017441 | 1.022277 | < 0.001*** |
| PLT         | 0.002588 | 0.000249   | 10.401  | 1.002592 | 1.002102 | 1.003081 | < 0.001*** |
| ApoB        | 0.4143   | 0.05413    | 7.654   | 1.513337 | 1.361002 | 1.6827   | < 0.001*** |
| TB          | 0.00778  | 0.002057   | 3.782   | 1.00781  | 1.003739 | 1.011865 | < 0.001*** |

**Supplementary Table 5.** Cox regression for risk factors of NAFLD

|         | se(coef) | z value | coef     | HR       | lower .95 | upper .95 | Pr(> z )    |
|---------|----------|---------|----------|----------|-----------|-----------|-------------|
| BMI     | 0.005327 | 35.102  | 0.186996 | 1.205622 | 1.1930993 | 1.2182761 | < 0.001***  |
| Albumin | 0.009655 | 4.656   | 0.04495  | 1.045976 | 1.0263691 | 1.0659575 | < 0.001***  |
| WGR     | 0.096408 | 1.326   | 0.12788  | 1.136417 | 0.9407519 | 1.3727778 | 0.184691    |
| WBC     | 0.010893 | 4.087   | 0.044521 | 1.045527 | 1.0234412 | 1.0680884 | < 0.001***  |
| TG      | 0.011283 | 11.755  | 0.132633 | 1.141831 | 1.1168563 | 1.1673638 | < 0.001***  |
| HDL     | 0.071682 | -13.214 | -0.94719 | 0.387829 | 0.3369955 | 0.4463302 | < 0.001***  |
| GLT     | 0.000494 | 2.601   | 0.001285 | 1.001285 | 1.0003166 | 1.0022553 | 0.009302**  |
| ALT     | 0.001478 | 9.309   | 0.013757 | 1.013853 | 1.0109201 | 1.0167934 | < 0.001***  |
| AST     | 0.003074 | -4.965  | -0.01526 | 0.984853 | 0.978937  | 0.990805  | < 0.001***  |
| Cr      | 0.001677 | -5.609  | -0.00941 | 0.990637 | 0.9873861 | 0.9939885 | < 0.001***  |
| ALP     | 0.000871 | 1.451   | 0.001263 | 1.001264 | 0.9995565 | 1.0029745 | 0.146888    |
| UA      | 0.000277 | 11.14   | 0.003085 | 1.003089 | 1.0025451 | 1.0036338 | < 0.001***  |
| Glu     | 0.016397 | 3.771   | 0.061837 | 1.063788 | 1.0301446 | 1.0985309 | 0.000162*** |
| SBp     | 0.001643 | 1.485   | 0.00244  | 1.002443 | 0.9992205 | 1.0056749 | 0.137485    |
| DBp     | 0.002517 | 2.383   | 0.005996 | 1.006014 | 1.0010643 | 1.0109889 | 0.01719*    |
| ESR     | 0.003054 | 3.429   | 0.010473 | 1.010528 | 1.0044965 | 1.0165956 | 0.000606*** |
| HGB     | 0.002056 | 4.507   | 0.009269 | 1.009312 | 1.0052523 | 1.0133885 | < 0.001***  |
| PLT     | 0.000389 | 3.318   | 0.001291 | 1.001292 | 1.0005286 | 1.0020554 | 0.000905*** |
| ApoB    | 0.092419 | 11.569  | 1.069192 | 2.913026 | 2.4303962 | 3.4914963 | < 0.001***  |
| TB      | 0.003316 | -0.216  | -0.00072 | 0.999283 | 0.9928097 | 1.0057994 | 0.828863    |



## STROBE Statement—checklist of items that should be included in reports of observational studies

|                           | Item No | Recommendation                                                                                                                                                                                                                                                                                                                                                                                                                                                                                                                                                                                                                                                                                   | Page No |
|---------------------------|---------|--------------------------------------------------------------------------------------------------------------------------------------------------------------------------------------------------------------------------------------------------------------------------------------------------------------------------------------------------------------------------------------------------------------------------------------------------------------------------------------------------------------------------------------------------------------------------------------------------------------------------------------------------------------------------------------------------|---------|
| <b>Title and abstract</b> | 1       | (a) Indicate the study's design with a commonly used term in the title or the abstract<br>(b) Provide in the abstract an informative and balanced summary of what was done and what was found                                                                                                                                                                                                                                                                                                                                                                                                                                                                                                    |         |
| <b>Introduction</b>       |         |                                                                                                                                                                                                                                                                                                                                                                                                                                                                                                                                                                                                                                                                                                  |         |
| Background/rationale      | 2       | Explain the scientific background and rationale for the investigation being reported                                                                                                                                                                                                                                                                                                                                                                                                                                                                                                                                                                                                             |         |
| Objectives                | 3       | State specific objectives, including any prespecified hypotheses                                                                                                                                                                                                                                                                                                                                                                                                                                                                                                                                                                                                                                 |         |
| <b>Methods</b>            |         |                                                                                                                                                                                                                                                                                                                                                                                                                                                                                                                                                                                                                                                                                                  |         |
| Study design              | 4       | Present key elements of study design early in the paper                                                                                                                                                                                                                                                                                                                                                                                                                                                                                                                                                                                                                                          |         |
| Setting                   | 5       | Describe the setting, locations, and relevant dates, including periods of recruitment, exposure, follow-up, and data collection                                                                                                                                                                                                                                                                                                                                                                                                                                                                                                                                                                  |         |
| Participants              | 6       | (a) <i>Cohort study</i> —Give the eligibility criteria, and the sources and methods of selection of participants. Describe methods of follow-up<br><i>Case-control study</i> —Give the eligibility criteria, and the sources and methods of case ascertainment and control selection. Give the rationale for the choice of cases and controls<br><i>Cross-sectional study</i> —Give the eligibility criteria, and the sources and methods of selection of participants<br>(b) <i>Cohort study</i> —For matched studies, give matching criteria and number of exposed and unexposed<br><i>Case-control study</i> —For matched studies, give matching criteria and the number of controls per case |         |
| Variables                 | 7       | Clearly define all outcomes, exposures, predictors, potential confounders, and effect modifiers. Give diagnostic criteria, if applicable                                                                                                                                                                                                                                                                                                                                                                                                                                                                                                                                                         |         |
| Data sources/measurement  | 8*      | For each variable of interest, give sources of data and details of methods of assessment (measurement). Describe comparability of assessment methods if there is more than one group                                                                                                                                                                                                                                                                                                                                                                                                                                                                                                             |         |
| Bias                      | 9       | Describe any efforts to address potential sources of bias                                                                                                                                                                                                                                                                                                                                                                                                                                                                                                                                                                                                                                        |         |
| Study size                | 10      | Explain how the study size was arrived at                                                                                                                                                                                                                                                                                                                                                                                                                                                                                                                                                                                                                                                        |         |
| Quantitative variables    | 11      | Explain how quantitative variables were handled in the analyses. If applicable, describe which groupings were chosen and why                                                                                                                                                                                                                                                                                                                                                                                                                                                                                                                                                                     |         |
| Statistical methods       | 12      | (a) Describe all statistical methods, including those used to control for confounding<br>(b) Describe any methods used to examine subgroups and interactions<br>(c) Explain how missing data were addressed<br>(d) <i>Cohort study</i> —If applicable, explain how loss to follow-up was addressed<br><i>Case-control study</i> —If applicable, explain how matching of cases and controls was addressed<br><i>Cross-sectional study</i> —If applicable, describe analytical methods taking account of sampling strategy<br>(e) Describe any sensitivity analyses                                                                                                                                |         |

1  
2  
3  
4  
5  
6  
7  
8  
9  
10  
11  
12  
13  
14  
15  
16  
17  
18  
19  
20  
21  
22  
23  
24  
25  
26  
27  
28  
29  
30  
31  
32  
33  
34  
35  
36  
37  
38  
39  
40  
41  
42  
43  
44  
45  
46  
47  
48  
49  
50  
51  
52  
53  
54  
55  
56  
57  
58  
59  
60

Continued on next page

For peer review only

1  
2  
3  
4  
5  
6  
7  
8  
9  
10  
11  
12  
13  
14  
15  
16  
17  
18  
19  
20  
21  
22  
23  
24  
25  
26  
27  
28  
29  
30  
31  
32  
33  
34  
35  
36  
37  
38  
39  
40  
41  
42  
43  
44  
45  
46  
47  
48  
49  
50  
51  
52  
53  
54  
55  
56  
57  
58  
59  
60

| <b>Results</b>           |         |                                                                                                                                                                                                                                                                                                                                                                                                               |
|--------------------------|---------|---------------------------------------------------------------------------------------------------------------------------------------------------------------------------------------------------------------------------------------------------------------------------------------------------------------------------------------------------------------------------------------------------------------|
| Participants             | 13<br>* | (a) Report numbers of individuals at each stage of study—eg numbers potentially eligible, examined for eligibility, confirmed eligible, included in the study, completing follow-up, and analysed<br>(b) Give reasons for non-participation at each stage<br>(c) Consider use of a flow diagram                                                                                                               |
| Descriptive data         | 14<br>* | (a) Give characteristics of study participants (eg demographic, clinical, social) and information on exposures and potential confounders<br>(b) Indicate number of participants with missing data for each variable of interest<br>(c) <i>Cohort study</i> —Summarise follow-up time (eg, average and total amount)                                                                                           |
| Outcome data             | 15<br>* | <i>Cohort study</i> —Report numbers of outcome events or summary measures over time<br><i>Case-control study</i> —Report numbers in each exposure category, or summary measures of exposure<br><i>Cross-sectional study</i> —Report numbers of outcome events or summary measures                                                                                                                             |
| Main results             | 16      | (a) Give unadjusted estimates and, if applicable, confounder-adjusted estimates and their precision (eg, 95% confidence interval). Make clear which confounders were adjusted for and why they were included<br>(b) Report category boundaries when continuous variables were categorized<br>(c) If relevant, consider translating estimates of relative risk into absolute risk for a meaningful time period |
| Other analyses           | 17      | Report other analyses done—eg analyses of subgroups and interactions, and sensitivity analyses                                                                                                                                                                                                                                                                                                                |
| <b>Discussion</b>        |         |                                                                                                                                                                                                                                                                                                                                                                                                               |
| Key results              | 18      | Summarise key results with reference to study objectives                                                                                                                                                                                                                                                                                                                                                      |
| Limitations              | 19      | Discuss limitations of the study, taking into account sources of potential bias or imprecision. Discuss both direction and magnitude of any potential bias                                                                                                                                                                                                                                                    |
| Interpretation           | 20      | Give a cautious overall interpretation of results considering objectives, limitations, multiplicity of analyses, results from similar studies, and other relevant evidence                                                                                                                                                                                                                                    |
| Generalisability         | 21      | Discuss the generalisability (external validity) of the study results                                                                                                                                                                                                                                                                                                                                         |
| <b>Other information</b> |         |                                                                                                                                                                                                                                                                                                                                                                                                               |
| Funding                  | 22      | Give the source of funding and the role of the funders for the present study and, if applicable, for the original study on which the present article is based                                                                                                                                                                                                                                                 |

\*Give information separately for cases and controls in case-control studies and, if applicable, for exposed and unexposed groups in cohort and cross-sectional studies.

**Note:** An Explanation and Elaboration article discusses each checklist item and gives methodological background and published examples of transparent reporting. The STROBE checklist is best used in conjunction with this article (freely available on the Web sites of PLoS Medicine at <http://www.plosmedicine.org/>, Annals of Internal Medicine at <http://www.annals.org/>, and Epidemiology at <http://www.epidem.com/>). Information on the STROBE Initiative is available at [www.strobe-statement.org](http://www.strobe-statement.org).

# BMJ Open

## Clinical outcome of nonalcoholic fatty liver disease: an eleven-year follow-up study

|                                 |                                                                                                                                                                                                                                                                                                                                                                                                                                                                                                                                                                                                                                                                                                                                                                                                                                                                                                                                                                                                                                                                                                                                                                                                                                                                                                                                                                                                                                                                                                                                                                                                                                                                                                                                                                       |
|---------------------------------|-----------------------------------------------------------------------------------------------------------------------------------------------------------------------------------------------------------------------------------------------------------------------------------------------------------------------------------------------------------------------------------------------------------------------------------------------------------------------------------------------------------------------------------------------------------------------------------------------------------------------------------------------------------------------------------------------------------------------------------------------------------------------------------------------------------------------------------------------------------------------------------------------------------------------------------------------------------------------------------------------------------------------------------------------------------------------------------------------------------------------------------------------------------------------------------------------------------------------------------------------------------------------------------------------------------------------------------------------------------------------------------------------------------------------------------------------------------------------------------------------------------------------------------------------------------------------------------------------------------------------------------------------------------------------------------------------------------------------------------------------------------------------|
| Journal:                        | <i>BMJ Open</i>                                                                                                                                                                                                                                                                                                                                                                                                                                                                                                                                                                                                                                                                                                                                                                                                                                                                                                                                                                                                                                                                                                                                                                                                                                                                                                                                                                                                                                                                                                                                                                                                                                                                                                                                                       |
| Manuscript ID                   | bmjopen-2021-054891.R2                                                                                                                                                                                                                                                                                                                                                                                                                                                                                                                                                                                                                                                                                                                                                                                                                                                                                                                                                                                                                                                                                                                                                                                                                                                                                                                                                                                                                                                                                                                                                                                                                                                                                                                                                |
| Article Type:                   | Original research                                                                                                                                                                                                                                                                                                                                                                                                                                                                                                                                                                                                                                                                                                                                                                                                                                                                                                                                                                                                                                                                                                                                                                                                                                                                                                                                                                                                                                                                                                                                                                                                                                                                                                                                                     |
| Date Submitted by the Author:   | 07-May-2022                                                                                                                                                                                                                                                                                                                                                                                                                                                                                                                                                                                                                                                                                                                                                                                                                                                                                                                                                                                                                                                                                                                                                                                                                                                                                                                                                                                                                                                                                                                                                                                                                                                                                                                                                           |
| Complete List of Authors:       | <p>Tang, Xiaoping ; Ningbo Zhenhai District Lianhua Hospital , Department of Prevention and Health Care</p> <p>Shi, Yanyan; Peking University Third Hospital, Research Center of Clinical Epidemiology</p> <p>Du, Juan ; Ningbo Zhenhai District Lianhua Hospital , Department of Internal Medicine</p> <p>Hu, Keming; Ningbo Zhenhai District Lianhua Hospital, Department of Prevention and Health Care</p> <p>Zhou, Tingting; Ningbo Zhenhai District Lianhua Hospital , Department of Internal Medicine</p> <p>Chen, Lan; Ningbo Zhenhai District Lianhua Hospital , Department of Radiology</p> <p>Zhang, Yanming; Ningbo Zhenhai District Lianhua Hospital , Center Laboratory</p> <p>Li, Fujun; Ningbo Zhenhai District Lianhua Hospital , Department of Radiology</p> <p>Zhang, Huier ; Ningbo Zhenhai District Lianhua Hospital , Center Laboratory</p> <p>Liebe, Roman ; Heinrich Heine University Düsseldorf, Clinic of Gastroenterology, Hepatology and Infectious Diseases,; Saarland University, Department of Medicine II, Saarland University Medical Center</p> <p>Meyer, Christoph ; Heidelberg University, Department of Medicine II, Medical Faculty Mannheim</p> <p>Dooley, Steven ; Heidelberg University, Department of Medicine II, Medical Faculty Mannheim</p> <p>Zhu, Zhongwei; Ningbo Zhenhai District Lianhua Hospital , Department of Surgery</p> <p>Weng, Hong-Lei ; Heidelberg University, Department of Medicine II, Medical Faculty Mannheim</p> <p>JIA, Jinzhu; Peking University, Department of Biostatistics, School of Public Health; Peking University, Center for Statistical Science</p> <p>Huang, Tong; Ningbo City First Hospital; Ningbo Zhenhai District Lianhua Hospital , Department of Prevention and Health Care</p> |
| <b>Primary Subject Heading</b>: | Gastroenterology and hepatology                                                                                                                                                                                                                                                                                                                                                                                                                                                                                                                                                                                                                                                                                                                                                                                                                                                                                                                                                                                                                                                                                                                                                                                                                                                                                                                                                                                                                                                                                                                                                                                                                                                                                                                                       |
| Secondary Subject Heading:      | Cardiovascular medicine, Diabetes and endocrinology                                                                                                                                                                                                                                                                                                                                                                                                                                                                                                                                                                                                                                                                                                                                                                                                                                                                                                                                                                                                                                                                                                                                                                                                                                                                                                                                                                                                                                                                                                                                                                                                                                                                                                                   |
| Keywords:                       | Epidemiology < INFECTIOUS DISEASES, Hypertension < CARDIOLOGY,                                                                                                                                                                                                                                                                                                                                                                                                                                                                                                                                                                                                                                                                                                                                                                                                                                                                                                                                                                                                                                                                                                                                                                                                                                                                                                                                                                                                                                                                                                                                                                                                                                                                                                        |

1  
2  
3  
4  
5  
6  
7  
8  
9  
10  
11  
12  
13  
14  
15  
16  
17  
18  
19  
20  
21  
22  
23  
24  
25  
26  
27  
28  
29  
30  
31  
32  
33  
34  
35  
36  
37  
38  
39  
40  
41  
42  
43  
44  
45  
46  
47  
48  
49  
50  
51  
52  
53  
54  
55  
56  
57  
58  
59  
60

|  |                                                                                                                                                    |
|--|----------------------------------------------------------------------------------------------------------------------------------------------------|
|  | DIABETES & ENDOCRINOLOGY, Health & safety < HEALTH SERVICES<br>ADMINISTRATION & MANAGEMENT, Health informatics <<br>BIOTECHNOLOGY & BIOINFORMATICS |
|  |                                                                                                                                                    |

SCHOLARONE™  
Manuscripts



I, the Submitting Author has the right to grant and does grant on behalf of all authors of the Work (as defined in the below author licence), an exclusive licence and/or a non-exclusive licence for contributions from authors who are: i) UK Crown employees; ii) where BMJ has agreed a CC-BY licence shall apply, and/or iii) in accordance with the terms applicable for US Federal Government officers or employees acting as part of their official duties; on a worldwide, perpetual, irrevocable, royalty-free basis to BMJ Publishing Group Ltd ("BMJ") its licensees and where the relevant Journal is co-owned by BMJ to the co-owners of the Journal, to publish the Work in this journal and any other BMJ products and to exploit all rights, as set out in our [licence](#).

The Submitting Author accepts and understands that any supply made under these terms is made by BMJ to the Submitting Author unless you are acting as an employee on behalf of your employer or a postgraduate student of an affiliated institution which is paying any applicable article publishing charge ("APC") for Open Access articles. Where the Submitting Author wishes to make the Work available on an Open Access basis (and intends to pay the relevant APC), the terms of reuse of such Open Access shall be governed by a Creative Commons licence – details of these licences and which [Creative Commons](#) licence will apply to this Work are set out in our licence referred to above.

Other than as permitted in any relevant BMJ Author's Self Archiving Policies, I confirm this Work has not been accepted for publication elsewhere, is not being considered for publication elsewhere and does not duplicate material already published. I confirm all authors consent to publication of this Work and authorise the granting of this licence.

## Clinical outcome of nonalcoholic fatty liver disease: an eleven-year follow-up study

Xiaoping Tang<sup>1#</sup>, Yanyan Shi<sup>2#</sup>, Juan Du<sup>3#</sup>, Keming Hu<sup>1</sup>, Tingting Zhou<sup>3</sup>, Lan Chen<sup>4</sup>, Yanming Zhang<sup>5</sup>, Fujun Li<sup>4</sup>, Huier Zhang<sup>5</sup>, Roman Liebe<sup>6,7</sup>, Christoph Meyer<sup>8</sup>, Steven Dooley<sup>8</sup>, Zhongwei Zhu<sup>9</sup>, Hong-Lei Weng<sup>8</sup>, Jinzhu Jia<sup>10,11\*</sup>, Tong Huang<sup>1,12\*</sup>

<sup>1</sup> Department of Prevention and Health Care, Ningbo Zhenhai Lianhua Hospital, Ningbo, China

<sup>2</sup> Research Center of Clinical Epidemiology, Peking University Third Hospital, Beijing, China

<sup>3</sup> Department of Internal Medicine, Ningbo Zhenhai Lianhua Hospital, Ningbo, China

<sup>4</sup> Department of Radiology, Ningbo Zhenhai Lianhua Hospital, Ningbo, China

<sup>5</sup> Center Laboratory, Ningbo Zhenhai Lianhua Hospital, Ningbo, China

<sup>6</sup> Clinic of Gastroenterology, Hepatology and Infectious Diseases, Heinrich Heine University, Düsseldorf, Germany;

<sup>7</sup> Department of Medicine II, Saarland University Medical Center, Saarland University, Homburg, Germany;

<sup>8</sup> Department of Medicine II, Medical Faculty Mannheim, Heidelberg University, Mannheim, Germany;

<sup>9</sup> Department of Surgery, Ningbo Zhenhai Lianhua Hospital, Ningbo, China

<sup>10</sup> Department of Biostatistics, School of Public Health, Peking University Health Science Center, Beijing, 100191, P.R. China

<sup>11</sup> Center for Statistical Science, Peking University, Beijing, 100871, P.R. China

<sup>12</sup> Center of health Management, Ningbo No.1 Hospital

# These authors contributed to the project equally.

\* Co-senior authors

### Corresponding authors:

Tong Huang, MD

Center of health Management, Ningbo No.1 Hospital

Address: No. 59, Liuting Street, Haishu District, Ningbo, Zhejiang Province, 315010, P.R. China

Email: nbbjzxht@163.com

Tel: +86-13586835095

1  
2  
3 35  
4  
5 36 Jinzhu Jia, PhD.  
6  
7 37 Department of Biostatistics, School of Public Health, Peking University Health Science  
8  
9 38 Center  
10 39 Address: No. 38, Xueyuan Road, Haidian District, Beijing, 100191, P.R. China  
11  
12 40 Email: jzjia@math.pku.edu.cn  
13  
14 41 Tel: +86-15801049187  
15  
16 42

17 43 **Competing interests:**

18  
19 44 Authors do not have conflict of interest.  
20  
21 45

22 46 **Funding statement:**

23  
24  
25 47 This project is supported by the National Key R&D Program of China No. 2017YFC0908103  
26  
27 48 (X.T., and J.D.).  
28  
29 49

30 50 **Data availability statement**

31  
32 51 Data are available upon reasonable request.  
33  
34 52

35  
36 53 **Acknowledgements:**

37  
38 54 We are grateful to Drs. Changxi Chen, Jingyi Yuan and Yongjun Chen for support and  
39  
40 55 discussion.  
41  
42 56

43 57 **Author contributions:**

44  
45 58 Conception and design: Xiaoping Tang, Yanyan Shi, Juan Du, Hong-Lei Weng, Jinzhu Jia  
46  
47  
48 59 and Tong Huang

49  
50 60 Ultrasonography: Lan Chen, Fujun Li

51  
52 61 Blood assays: Yanming Zhang and Huier Zhang

53  
54 62 Other examinations and data collection: Xiaoping Tang, Keming Hu, Tingting Zhou, Juan Du,

55  
56  
57 63 Zhongwei Zhu and Tong Huang

58  
59 64 Statistical analyses: Yanyan Shi and Jinzhu Jia  
60



1  
2  
3  
4  
5  
6  
7  
8  
9  
10  
11  
12  
13  
14  
15  
16  
17  
18  
19  
20  
21  
22  
23  
24  
25  
26  
27  
28  
29  
30  
31  
32  
33  
34  
35  
36  
37  
38  
39  
40  
41  
42  
43  
44  
45  
46  
47  
48  
49  
50  
51  
52  
53  
54  
55  
56  
57  
58  
59  
60

65 Drafting the article: Hong-Lei Weng

66 Reviewing and editing the article critically: Xiaoping Tang, Yanyan Shi, Christoph Meyer,

67 Roman Liebe, Steven Dooley, Hong-Lei Weng, Jinzhu Jia and Tong Huang

68

For peer review only

1  
2  
3 **69 Abstract**

4 70  
5 71 **Objectives** To clarify NAFLD prevalence, risk factors, and clinical outcome in an exemplary  
6 72 Chinese population, a cohort of company employees was followed up for eleven years.

7 73 **Design** Retrospective cohort study

8 74 **Setting** Between 2006-2016 in China

9 75 **Participants** 13032 company employees

10 76 **Results** Over eleven years, the prevalence of NAFLD increased from 17.2% to 32.4% (males  
11 77 20.5% to 37% *versus* females 9.8% to 22.2%). Male peak prevalence was between 40 and 60  
12 78 years of age, whereas highest prevalence in women was at an age of 60 years and older. Logistic  
13 79 and Cox regression revealed 16 risk factors, including body mass index, albumin, white blood  
14 80 cell, triglycerides, high density lipoprotein, glutamyl transpeptidase, alanine transaminase,  
15 81 creatinine, urea acid, glucose, systolic blood pressure, diastolic blood pressure, Blood  
16 82 sedimentation, hemoglobin, platelet, and Apolipoprotein B2 ( $P < 0.05$  for all factors). The Area  
17 83 Under the Curve of these variables for NAFLD is 0.88. However, cause-effect analyses showed  
18 84 that only body mass index, gender and triglycerides directly contributed to NAFLD  
19 85 development. Over an 11-year follow-up period, 12.6%, 37.7% and 14.2% of male NAFLD  
20 86 patients and 11.6%, 44.7% and 22.6% of female NAFLD patients developed diabetes,  
21 87 hypertension and hyperuricemia, respectively. Except one male patient who developed  
22 88 cirrhosis, no NAFLD patients progressed into severe liver disease.

23 89 **Conclusion** Diabetes, hypertension and hyperuricemia are the main clinical outcomes of  
24 90 NAFLD. Eleven years of NAFLD are not sufficient to cause severe liver disease. Age and  
25 91 obesity are direct risk factors for NAFLD. BMI, gender and triglycerides are three parameters  
26 92 directly reflecting the occurrence of NAFLD.

27 93

28 94 **(Words: 250)**

29 95

30 96 **Strengths and limitations of this study**

- 31 97 ● This study dynamically follows up NAFLD prevalence in an eastern Chinese community  
32 98 for eleven years.
- 33 99 ● The study adopted First order Markov models to evaluate the cause-effect link between  
34 100 NAFLD and risk factors.
- 35 101 ● The relatively low sensitivity of ultrasound for the detection of liver fat might  
36 102 underestimate the incidence of NAFLD in this cohort.

- 1  
2  
3 103 ● Given that the current study is a single-center observation, multiple-center studies are  
4 required to confirm the conclusions in the future.  
5 104  
6 105 ● The study population is a highly select, relatively homogenous group of well-educated  
7 professionals in privileged social positions and permanent employment. Thus, the  
8 106 conclusions might not be transferable to the general Chinese population.  
9 107  
10 108  
11  
12  
13  
14  
15  
16  
17  
18  
19  
20  
21  
22  
23  
24  
25  
26  
27  
28  
29  
30  
31  
32  
33  
34  
35  
36  
37  
38  
39  
40  
41  
42  
43  
44  
45  
46  
47  
48  
49  
50  
51  
52  
53  
54  
55  
56  
57  
58  
59  
60

For peer review only

## 109 **Introduction**

110 Non-alcoholic fatty liver disease (NAFLD) is one of the most common causes of chronic liver  
111 disease globally [1]. The global prevalence of NAFLD is currently around 25% [2,3]. NAFLD is  
112 predicted to become the most frequent indication for liver transplantation by 2030 in Western  
113 countries [4]. An analysis based on 18 million patients in four European cohorts showed that  
114 NAFLD and non-alcoholic steatohepatitis (NASH) increase the risk of end-stage liver diseases,  
115 e.g., cirrhosis and hepatocellular carcinoma (HCC) [5]. Of note, NAFLD is not only a disease  
116 restricted to the liver, but also affects extra-hepatic organs. NAFLD is tightly associated with  
117 the occurrence of type 2 diabetes mellitus (T2DM), cardiovascular (CVD) and cardiac diseases,  
118 and chronic kidney disease (CKD) [4].

119  
120 In China, the incidence of NAFLD has been increasing over the last two decades. A recent  
121 meta-analysis, based on 392 studies between 2008 and 2018, showed the national incidence of  
122 NAFLD in China to be at 29.2% [6]. In Shanghai, the adult incidence of NAFLD has increased  
123 from 14.04% in 1995 to 43.65% in 2015 [2]. Being a vast country, Chinese living in different  
124 areas vary widely in lifestyle and economic status. Thus, the epidemiology, natural history and  
125 clinical outcomes of NAFLD in different areas of the country are worth further investigation.

126  
127 It is well accepted that viral hepatitis is a major reason for progressive chronic liver diseases,  
128 e.g., fibrosis, cirrhosis and ultimately, hepatocellular carcinoma (HCC). With regard to  
129 NAFLD, incidence and severity of associated chronic liver disease outcomes has not been  
130 monitored in large Chinese cohorts yet – especially over an extended time span. The current  
131 study therefore describes the prevalence of NAFLD in a large Eastern Chinese community over  
132 eleven years (2006 - 2016). We focused on three questions: (1) What is the annual incidence of  
133 NAFLD? (2) What are the risk factors for NAFLD? And (3) What are the most frequent extra-  
134 and intrahepatic clinical outcomes of NAFLD in this selected population?

## 135 **Methods**

### 136 *Patient and public involvement*

137  
138 No patients were involved in this study

### 139 *Design and participants*

140  
141 In this retrospective study we analyzed the "annual health examination database" of the Zhenhai  
142 Lianhua Hospital from 2006 to 2016. This hospital is affiliated to Sinopec Zhenhai Refining &

1  
2  
3 144 Chemical Company. Supported by the company, all employees were offered the opportunity to  
4  
5 145 go to this hospital for an annual health examination. Over a period of 11 years, a total 13,032  
6  
7 146 employees received health examinations. From 2006 to 2016, 11689, 11706, 11584, 9521,  
8  
9 147 9592, 9725, 9710, 9869, 9718, 9702 and 9706 persons received health examinations (**Figure**  
10  
11 148 **1**). To describe the longitudinal NAFLD occurrence in this cohort, we excluded subjects with  
12  
13 149 the following conditions: (1) viral hepatitis B and C infection, which were identified by blood  
14  
15 150 virus measurements (HBV-DNA and HCV-RNA), and (2) alcoholic liver disease, which was  
16  
17 151 defined as previously described [7,8]. NAFLD was defined as the presence of hepatic steatosis,  
18  
19 152 determined by ultrasonography.  
20  
21 153 The study protocol was approved by the Ethics Committee of Zhenhai Lianhua Hospital  
22  
23 154 ([2016]001). Informed consent was obtained from all subjects.

24 155

25 156 *Measures*

26 157 **Supplementary Table 1** shows all parameters measured in the annual health examinations.  
27  
28 158 Ultrasonography was performed by the same three experienced doctors (L.C., F. L., and J.Y.)  
29  
30 159 with an Ultrasonograph B, GE, Voluson 730 pro. Blood biochemistry and HBV serum levels  
31  
32 160 were measured by an Olympus AU640 autoanalyzer (Olympus, Kobe, Japan) and an  
33  
34 161 ImmunoAssay Analyzer VitrosECI (JOHNSON-JOHNSON, USA), respectively. All methods  
35  
36 162 were carried out in accordance with relevant guidelines and regulations.

37 163

38 164 *Statistical analysis*

39  
40 165 For population characteristics, variables were described as means and standard deviation (SD)  
41  
42 166 or proportions as appropriate. Student's t-test or nonparametric test was used to analyze  
43  
44 167 differences between two groups as mentioned. Chi-square test was used to verify the differences  
45  
46 168 of nominative variables between two groups. Multivariate analysis of risk factors for NAFLD  
47  
48 169 was performed using logistic regression analysis. Combined receiver operating characteristic  
49  
50 170 curve (ROC) and area under curve (AUC) analyses were used to evaluate the diagnostic  
51  
52 171 performance of biomarkers based on the logistic regression model. Multivariate Cox regression  
53  
54 172 model was performed to calculate hazard ratios of variables to identify independent prognostic  
55  
56 173 variables. First order Markov models were used to analyze the cause-effect link between  
57  
58 174 NAFLD and risk factors. L1 penalized logistic regression was applied to select predictive  
59  
60 175 predictors. R package "glmnet" contains functions to select predictors using L1 penalized  
176 176 logistic regression. Statistical analyses were performed using SPSS 22.0 and R version 3.5.3.

1  
2  
3 177 *P*-values that were less than 0.05 were considered statistically significant. Figures were  
4 generated by R package such as ‘forestplot’, ‘ROCR’, ‘bnlearn’, or ‘survival’.

5 178  
6 179

7 180

## 8 181 **Results**

9 182

### 10 183 *Prevalence of NAFLD from 2006 to 2016*

11 184 We retrospectively analyzed 9786, 9852, 9827, 8026, 8225, 8309, 8311, 8552, 8442, 8463 and  
12 185 8436 persons who received health examinations from 2006 to 2016. **Supplementary Table 2**  
13 186 shows the eleven-year annual NAFLD incidence in this population. In 2006, NAFLD was  
14 187 diagnosed in 17.2% of persons, and gradually increased over the examination period to 19%  
15 188 (2007), 22% (2008), 22.4% (2009), 22.7% (2010), 23.4% (2011), 24.5% (2012), 25.4% (2013),  
16 189 27.9% (2014), 30.8% (2015), and 32.4% (2016), respectively (**Supplementary Table 2**). Both  
17 190 males and females demonstrated continuously increasing NAFLD prevalence (**Supplementary**  
18 191 **Table 2**). Compared to females, male Chinese demonstrated significantly higher NAFLD  
19 192 prevalence, e.g., in 2006, the prevalence of NAFLD in males and females was 20.5% and 9.8%,  
20 193 respectively. Eleven years later, the prevalence had increased to 37% in males and 22.2% in  
21 194 females (**Supplementary Table 2**). Noteworthy, the prevalence of NAFLD in male and female  
22 195 was correlating with age. The peak prevalence of NAFLD in men emerged in those aged  
23 196 between 40 and 60 years. In 2006, the prevalence of NAFLD in men aged between 40 - 50 and  
24 197 50 - 60 years was 24.2% and 24.6%, respectively. In 2016, prevalence reached 42.8% and  
25 198 46.6% (**Supplementary Table 2**) for men. Distinct from males, the peak NAFLD prevalence  
26 199 in females emerged at an age above 60 years. In 2006, the prevalence of NAFLD in women  
27 200 older than 60 and 70 years was 25.6% and 22.9%, respectively. Eleven years later, these values  
28 201 had increased to 53.4% and 30.9% (**Supplementary Table 2**).

29 202

30 203 Among the observed population, 5606 persons received annual health examinations for 11  
31 204 years, and thus prevalence of NAFLD was analyzed in these individuals. As shown in **Table 1**,  
32 205 the prevalence of NAFLD increased from 17% in 2006 to 35.2% in 2016. The highest  
33 206 prevalence rates for NAFLD in 3795 men emerged in those older than 40 years. In 2006, the  
34 207 NAFLD prevalence in males aged between 40 - 50, 50 - 60, and 60 - 70 years was 24.2%,  
35 208 25.4% and 19.8%, respectively. In 2016, these values reached 43.3%, 46.8% and 42.3% (**Table**  
36 209 **1**). Different from males, the peak NAFLD prevalence in 1811 females emerged at an age of  
37 210 more than 60 years. In 2006, the prevalence of NAFLD in women older than 60 or 70 years

211 was 22.1% and 28%, respectively. Eleven years later, these values had increased to 31.8% and  
212 28.6% (**Table 1**).

213

### 214 *BMI and NAFLD incidence*

215 Given the tight link between obesity and NAFLD, we paid special attention to the population  
216 with high BMI. We focused on the 5606 persons with complete follow-up and analyzed the  
217 prevalence of NAFLD in those with BMI >25. In total, out of the 5606 persons, 2445 presented  
218 with a BMI of >25. The prevalence of NAFLD in this overweight subpopulation was far higher  
219 than in the general population. In 2006, 45.2% of individuals (n=1104; male vs. female: 47.3%  
220 vs. 37.1%) with BMI >25 were suffering from NAFLD (**Supplementary Table 3**). In 2016,  
221 values reached 67.1% (n=1414; male vs. female: 69% vs. 59.2%, **Supplementary Table 3**).  
222 Impressively, the NAFLD prevalence in both genders was very high at any age, even in those  
223 below the age of 30 years. In 2006, among 213 overweight men, younger than 30 years, 52.6%  
224 were also diagnosed for NAFLD (**Supplementary Table 3**). This number increased to 63% in  
225 2016 (**Supplementary Table 3**). In 2006, there were 15 overweight women aged less than 30  
226 years. Among them, 3 presented as NAFLD (20%). In 2016, 7 out of 16 overweight women  
227 aged less than 30 years were identified. The NAFLD prevalence had increased to 43.8%  
228 (**Supplementary Table 3**). In those older than 40 years, NAFLD prevalence increased from  
229 36.6 – 45.4% in 2006 to 53 – 65.6% in 2016 (**Supplementary Table 3**).

230

### 231 *Risk factors relevant to NAFLD occurrence*

232 Next, we analyzed risk factors relevant to NAFLD occurrence. Logistic regression analysis was  
233 performed on 26 parameters, including gender, age, BMI, albumin, white globulin ratio (WGR),  
234 white blood cell count (WBC), low density lipoprotein (LDL), triglycerides (TG), high density  
235 lipoprotein (HDL), glutamyl transpeptidase (GLT), alanine transaminase (ALT), aspartate  
236 transaminase (AST), creatinine (Cr), alkaline phosphatase (ALP), blood urea nitrogen (Bun),  
237 uric acid (UA), blood glucose (Glu), systolic blood pressure (SBp), diastolic blood pressure  
238 (DBp), Blood sedimentation (ESR), hemoglobin (HGB), platelets (PLT), Apolipoprotein A1  
239 (ApoA1), Apolipoprotein B2 (ApoB), total bilirubin (TB), total protein (TP). We performed  
240 variable selection by penalized Logistic regression using R package glmnet. Cross validation  
241 selected 16 variables as potential predictors. These were BMI, albumin, WBC, TG, HDL, GLT,  
242 ALT, Cr, UA, Glu, SBp, DBp, ESR, HGB, PLT and ApoB (**Supplementary Table 4**). The  
243 corresponding forest-plot is shown in **Figure 2A**. Among these variables, ApoB and BMI  
244 displayed the most robust positive correlation with NAFLD occurrence, while HDL had a

1  
2  
3 245 strong negative correlation with NAFLD incidence (**Supplementary Table 4**). The AUC of  
4  
5 246 these variables for NAFLD is 0.88 (see ROC curve in **Figure 2B**). We further performed a time  
6  
7 247 dependent Cox regression to calculate the hazard ratios of these parameters for NAFLD  
8  
9 248 occurrence. Cox regression confirmed that the 16 parameters were significantly relevant to  
10  
11 249 NAFLD incidence (**Supplementary Table 5** and **Figure 2C**). Furthermore, ApoB and HDL  
12  
13 250 were the most robust positive and negative risk factors for NAFLD (**Figure 2C**).  
14  
15 251

#### 15 252 *Cause-effect link between risk factors and NAFLD occurrence*

16  
17 253 Although the aforementioned parameters were regarded as “risk factors” according to statistical  
18  
19 254 models, it did not necessarily mean that all of them contributed to NAFLD occurrence. Based  
20  
21 255 on 11 years of longitudinal data, it was possible to construct a dynamic Bayesian network to  
22  
23 256 identify the risk factors most relevant to NAFLD occurrence. As shown in **Figure 3**, these  
24  
25 257 parameters constituted a complicated, but clear intercross paradigm. Only three parameters,  
26  
27 258 BMI, gender and TG directly pointed to NAFLD. In addition, ApoB impacted the incidence of  
28  
29 259 NAFLD through contributing to TG. Furthermore, LDL can indirectly contribute to NAFLD  
30  
31 260 through influencing ApoB. Very impressively, the dynamic Bayesian network pointed out that  
32  
33 261 NAFLD directly leads to alterations of seven parameters: ALT, DBp, SBp, TP, albumin, HGB  
34  
35 262 and UA. Intriguingly, age, GLT, AST, Cr, and BUN did not interact with any other parameter  
36  
37 263 in our model, indicating that these factors correlate by incidence, but there is no causal  
38  
39 264 interaction.

#### 39 266 *Outcome of NAFLD*

40  
41 267 Subsequently, we examined clinical outcomes of NAFLD over the eleven years. **Table 2**  
42  
43 268 summarizes the incidence of intra- and extrahepatic diseases of 696 NAFLD and 222 NASH  
44  
45 269 patients during the follow-up period. Among the total NAFLD and NASH population, only 1  
46  
47 270 male NAFLD patient developed liver cirrhosis within the eleven years. However, this time span  
48  
49 271 witnessed significantly increased extrahepatic diseases, including diabetes, hypertension and  
50  
51 272 hyperuricemia. In the NAFLD population, there were 64 (12.6%) men and 22 (11.6%) women,  
52  
53 273 191 (37.7%) men and 85 (44.7%) women, 72 (14.2%) men and 43 (22.6%) women who  
54  
55 274 developed into type II diabetes, hypertension and hyperuricemia, respectively (**Table 2**).  
56  
57 275 Given that 2006 is the starting point of data collection, patients diagnosed for NAFLD in this  
58  
59 276 year had by no means just manifested their disease, but rather patients had possibly developed  
60  
277 NAFLD several years prior to inclusion. To clarify the exact clinical outcomes of NAFLD over  
278  
one decade, we focused on the following two cohorts of individuals with annual health



1  
2  
3 279 examinations for 11 years: (1) patients who were diagnosed as non-NAFLD in 2006, but were  
4 280 NAFLD in 2007 (new NAFLD cohort); and (2) who were non-NAFLD in both 2006 and 2007  
5 281 (non-NAFLD cohort). As shown in **Table 2**, 185 new NAFLD cases (138 men and 47 women)  
6 282 and 4547 non-NAFLD (2786 men and 1761 women) persons were found in 2007. Between  
7 283 2007 and 2016, neither NAFLD nor non-NAFLD individuals developed liver cirrhosis or  
8 284 cancer. However, the one-decade follow-up reveals different prevalences of diabetes,  
9 285 hypertension and hyperuricemia: In NAFLD patients, there were 14 (10.1%) men and 5 (10.6%)  
10 286 women, 47 (34.1%) men and 21 (44.7%) women, 34 (24.6%) men and 8 (17%) women who  
11 287 developed type II diabetes, hypertension and hyperuricemia, respectively (**Table 2**). In non-  
12 288 NAFLD individuals, 157 (5.6%) men and 54 (3.4%) women, 259 (9.3%) men and 324 (18.4%),  
13 289 284 (10.2%) men and 84 women (4.8%) developed type II diabetes, hypertension and  
14 290 hyperuricemia, respectively (**Table 2**). For all three diseases, statistically significant differences  
15 291 were determined between the two cohorts of population (all  $P < 0.05$ , **Table 2**). These results  
16 292 suggest that diabetes, hypertension and hyperuricemia are the main clinical outcomes of  
17 293 NAFLD.  
18 294  
19 295

## 296 Discussion

297 This eleven-year follow-up retrospective study reports the following: (1) NAFLD prevalence  
298 has substantially increased in the examined Eastern Chinese population. (2) The prevalence of  
299 NAFLD differs by gender and age. Middle-aged men and elderly women are the two  
300 populations at highest risk for NAFLD. (3) Gender, BMI and triglycerides are the parameters  
301 directly associated with NAFLD occurrence. Regardless of gender and age, persons with high  
302 BMI ( $\geq 25$ ) have a high risk for NAFLD development. (4) NAFLD directly leads to alterations  
303 of seven clinical parameters: ALT, DBp, SBp, TP, albumin, HGB and UA. (5) Within 11 years,  
304 a significant part of the NAFLD population develops three clinically relevant diseases: type 2  
305 diabetes mellitus, hypertension and hyperuricemia. (6) Within 11 years, NAFLD does not cause  
306 severe liver disease, such as cirrhosis or HCC, in patients.  
307

308 The most impressive observation of the current study is that among 918 diseased persons (696  
309 NAFLD and 222 NASH), no patient progressed towards HCC and only 1 male NAFLD patient  
310 developed liver cirrhosis within the 11 years. Furthermore, among 185 new NAFLD cases  
311 diagnosed in 2007, none developed liver cirrhosis or liver cancer. Liver cirrhosis and HCC are  
312 commonly regarded as the most severe and costly clinical outcomes of NAFLD [9]. In USA and  
313 Europe, it is estimated that 10-15% of NAFLD patients develop advanced fibrosis [10]. In China,

1  
2  
3 314 a study with biopsy-proven NAFLD revealed 1.97%-2.97% cirrhosis prevalence [11]. In  
4  
5 315 addition, NAFLD is regarded as the third-most common cause of cancer-related death  
6  
7 316 worldwide [12]. In a study based on 4949 US patients with HCC, 701 patients had NAFLD [13].  
8  
9 317 It was estimated that the cumulative incidence of HCC among patients with NAFLD and  
10  
11 318 cirrhosis ranges from 2.4% to 12.8% over a median follow-up period of 3.2 to 7.2 years [14]  
12  
13 319 (Global Health Observatory) data. Mortality and global health estimates were obtained from:  
14  
15 320 [http://www.who.int/gho/mortality\\_burden\\_disease/en/](http://www.who.int/gho/mortality_burden_disease/en/). Last accessed on 1/7/2020.). Given that  
16  
17 321 the above conclusions were based on cross-sectional investigations and statistical models, it has  
18  
19 322 been unknown to date over which period a NAFLD patient develops liver cirrhosis or HCC  
20  
21 323 (personal risk assessment). Our 11-year follow-up provides therefore a valuable and  
22  
23 324 comprehensive dataset. In this study, most patients were diagnosed with NAFLD when they  
24  
25 325 received a routine health examination. Before the examination, these people did not have any  
26  
27 326 symptoms or signs of NAFLD. Therefore, they belong to NAFLD patients at a very early stage  
28  
29 327 (although for 2006, the duration of pre-existing NAFLD cannot be determined). Except for a  
30  
31 328 single person, no serious liver problems were observed within this time period. These data  
32  
33 329 suggest that for the vast majority of patients with early stage NAFLD, 11 years are not sufficient  
34  
35 330 to develop liver cirrhosis or cancer. Nasr et al followed up 129 NAFLD patients with varying  
36  
37 331 fibrosis stages on two occasions (mean time 13.7 and 9.3 years). Liver biopsy analyses showed  
38  
39 332 that 9.3% of patients developed end-stage liver disease and 34% advanced fibrosis [15]. The  
40  
41 333 NAFLD patients observed by Nasr et al. actually belonged to the NASH category, because they  
42  
43 334 suffered from fibrosis and elevated ALT and/or AST levels. As our study was based on  
44  
45 335 examinations of healthy, liver biopsy is not justifiable. Very likely, the current cohort included  
46  
47 336 a portion of NASH patients. They also did not show significant progression towards cirrhosis  
48  
49 337 or HCC was monitored.

50  
51 338  
52  
53 339 In contrast to hepatic complications, patients with NAFLD showed a significant risk for the  
54  
55 340 development of extrahepatic diseases, including diabetes, hypertension and hyperuricemia. In  
56  
57 341 696 NAFLD patients, eleven years witnessed the development of 86 cases (12.4%) type II  
58  
59 342 diabetes, 276 (40%) cases of hypertension and 115 patients with (16.5%) hyperuricemia,  
60  
343 respectively. Interestingly, in 222 NASH patients, the prevalence of these three diseases was  
344 12 (5.4%), 46 (20.7%), and 33 (14.9%) only. In general, men had a higher probability to develop  
345 these diseases than women. These results are consistent with previous reports from USA and  
346 Europe [16-18]. Whether NAFLD is associated with the risk of severe heart or brain diseases  
347 such as acute myocardial infarction (AMI) and stroke is worth further investigation. A recent

1  
2  
3 348 matched cohort study analyzed databases from four European countries, which included 17.7  
4  
5 349 million patients with NAFLD or NASH [19]. These patients had a mean follow-up of 2.1 to 5.5  
6  
7 350 years. The study showed that the diagnosis of NAFLD appears not to be associated with AMI  
8  
9 351 or stroke risk after adjustment for established cardiovascular risk factors. Nevertheless, the  
10 352 authors mentioned that cardiovascular risk assessment in adults with a diagnosis of NAFLD is  
11  
12 353 important [19]. Follow-up for 5 years might be not sufficient to reach a conclusion for this issue.  
13  
14 354

15 355 An important issue is the cause-and-effect relationship between NAFLD and its clinical  
16  
17 356 outcomes such as diabetes, hypertension and hyperuricemia. A dynamic Bayesian network in  
18  
19 357 the current study provides direct evidence on this issue: NAFLD directly results in alterations  
20  
21 358 of several parameters, including DBp, SBp and UA, suggesting that NAFLD directly  
22  
23 359 contributes to the occurrence of hypertension and hyperuricemia. The underlying mechanisms  
24  
25 360 require further investigation.

26 361 The current dynamic Bayesian network analysis does not confirm a direct cause-and-  
27  
28 362 effect relationship between NAFLD and type 2 diabetes mellitus. There are plenty of studies  
29  
30 363 showing the close relationship between type 2 diabetes and NAFLD [20]. Pathophysiologically,  
31  
32 364 insulin resistance is a key event in both NAFLD and diabetes progression [20]. However,  
33  
34 365 genome-wide association studies have not yet identified the exact impact of insulin resistance  
35  
36 366 on the variants associated with NAFLD severity [20,21]. Clarification of the cause-and-effect  
37  
38 367 relationship between NAFLD and diabetes requires further long-term follow-up studies.  
39  
40 368

41 369 To date, there are a large number of studies investigating risk factors for NAFLD [22]. These  
42  
43 370 studies tried to identify single, or multiple combined biomarkers to predict NAFLD occurrence.  
44  
45 371 Given that most studies were based on cross-sectional designs, or with only short follow-up  
46  
47 372 periods, it is difficult to clarify the causality between the proposed predictors and NAFLD  
48  
49 373 morbidity. Our eleven-year dataset provides a chance to shed led on this issue. Here, the  
50  
51 374 dynamic causal relationships between variables, including risk parameters and clinical  
52  
53 375 outcomes, were identified by a first order Markov model, which was displayed by a dynamic  
54  
55 376 Bayes network. The dynamic Bayes model discriminates causal relationship through time  
56  
57 377 sequence. When a variable change is closely related to a previous variance alteration, a causal  
58  
59 378 relationship between the two variables is assumed. Based on Logistic and Cox regression and  
60  
379 dynamic Bayesian network analyses, we confirmed three direct risk factors for NAFLD  
380 occurrence: gender, BMI and TG. These findings are supported by the following data: (1) Men  
381 have higher NAFLD prevalence than women in this population (37% *versus* 22.2% in 2016);

1  
2  
3 382 (2) In overweight people with a BMI >25, NAFLD prevalence reached 69% in males and 59.2%  
4 383 in females. Given that triglycerides are a major energy source, but are leading to obesity, it is  
5 384 not surprising that this parameter directly reflects the risk for NAFLD development. These  
6 385 findings provide robust evidence supporting the use of BMI to monitor or predict NAFLD.  
7  
8  
9

10 386

11 387

## 12 388 **Conclusion**

13 389 This 11-year follow-up study documents the rapid increase in NAFLD prevalence in an Eastern  
14 390 Chinese population. In contrast to previous reports, our observation does not observe that one  
15 391 decade of NAFLD is sufficient to lead to severe hepatic clinical outcomes. It is worthy to note  
16 392 that our population were biased because they are on the well-off, well-educated side of the  
17 393 Chinese people, while previous studies were often based on hospital populations, who suffered  
18 394 from negative selection bias and thus came up with higher estimates. In addition, given there  
19 395 are differences in NAFLD profiles between Eastern and Western populations, it would be  
20 396 interesting to know the natural development of NAFLD in a Western population. A key point  
21 397 for clarifying the true history of NAFLD is to follow a population starting from the early phases  
22 398 of the disease. Consistent with previous studies, NAFLD is tightly associated with multiple  
23 399 extra-hepatic diseases relevant to the metabolic syndrome. In the future, follow-up of the  
24 400 current cohort for another one and two decades will provide further valuable data to clarify the  
25 401 extended natural history of NAFLD. Last but not least, a large portion of the men and women  
26 402 in this study were educated above the average and have a position in the company that gave  
27 403 them the availability of better food choices as well as regular sport. On the other hand, the  
28 404 relatively low sensitivity of ultrasound for the detection of liver fat might underestimate the  
29 405 incidence of NAFLD in this cohort.  
30  
31  
32  
33  
34  
35  
36  
37  
38  
39  
40  
41  
42  
43  
44  
45  
46  
47

48 406

49 407

## 50 408 **References**

- 51 409 [1] Younossi ZM, Tampi R, Priyadarshini M, et al. Burden of Illness and Economic Model  
52 410 for Patients With Nonalcoholic Steatohepatitis in the United States. *Hepatology*, 2019,  
53 411 69: 564-572. <http://doi.org/10.1002/hep.30254>
- 54 412 [2] Younossi ZM, Loomba R, Anstee QM, et al. Diagnostic modalities for nonalcoholic  
55 413 fatty liver disease, nonalcoholic steatohepatitis, and associated fibrosis. *Hepatology*,  
56 414 2018, 68: 349-360. <http://doi.org/10.1002/hep.29721>
- 57 415 [3] Fan JG, Kim SU, Wong VW. New trends on obesity and NAFLD in Asia. *J Hepatol*,  
58 416 2017, 67: 862-873. <http://doi.org/10.1016/j.jhep.2017.06.003>

- 1  
2  
3  
4 417 [4] Byrne CD, Targher G. NAFLD: a multisystem disease. *J Hepatol*, 2015, 62: S47-64.  
5 418 <http://doi.org/10.1016/j.jhep.2014.12.012>
- 6 419 [5] Alexander M, Loomis AK, van der Lei J, et al. Risks and clinical predictors of cirrhosis  
7 420 and hepatocellular carcinoma diagnoses in adults with diagnosed NAFLD: real-world  
8 421 study of 18 million patients in four European cohorts. *BMC Med*, 2019, 17: 95.  
9 422 <http://doi.org/10.1186/s12916-019-1321-x>
- 10 423 [6] Zhou F, Zhou J, Wang W, et al. Unexpected Rapid Increase in the Burden of NAFLD  
11 424 in China From 2008 to 2018: A Systematic Review and Meta-Analysis. *Hepatology*,  
12 425 2019, 70: 1119-1133. <http://doi.org/10.1002/hep.30702>
- 13 426 [7] EASL-EASD-EASO Clinical Practice Guidelines for the management of non-alcoholic  
14 427 fatty liver disease. *J Hepatol*, 2016, 64: 1388-1402.  
15 428 <http://doi.org/10.1016/j.jhep.2015.11.004>
- 16 429 [8] Chalasani N, Younossi Z, Lavine JE, et al. The diagnosis and management of  
17 430 nonalcoholic fatty liver disease: Practice guidance from the American Association for  
18 431 the Study of Liver Diseases. *Hepatology*, 2018, 67: 328-357.  
19 432 <http://doi.org/10.1002/hep.29367>
- 20 433 [9] Younossi Z, Tacke F, Arrese M, et al. Global Perspectives on Nonalcoholic Fatty Liver  
21 434 Disease and Nonalcoholic Steatohepatitis. *Hepatology*, 2019, 69: 2672-2682.  
22 435 <http://doi.org/10.1002/hep.30251>
- 23 436 [10] Younossi ZM, Koenig AB, Abdelatif D, et al. Global epidemiology of nonalcoholic  
24 437 fatty liver disease-Meta-analytic assessment of prevalence, incidence, and outcomes.  
25 438 *Hepatology*, 2016, 64: 73-84. <http://doi.org/10.1002/hep.28431>
- 26 439 [11] Shen F, Zheng RD, Shi JP, et al. Impact of skin capsular distance on the performance  
27 440 of controlled attenuation parameter in patients with chronic liver disease. *Liver Int*,  
28 441 2015, 35: 2392-2400. <http://doi.org/10.1111/liv.12809>
- 29 442 [12] Ascha MS, Hanouneh IA, Lopez R, et al. The incidence and risk factors of  
30 443 hepatocellular carcinoma in patients with nonalcoholic steatohepatitis. *Hepatology*,  
31 444 2010, 51: 1972-1978. <http://doi.org/10.1002/hep.23527>
- 32 445 [13] Younossi ZM, Otgonsuren M, Henry L, et al. Association of nonalcoholic fatty liver  
33 446 disease (NAFLD) with hepatocellular carcinoma (HCC) in the United States from 2004  
34 447 to 2009. *Hepatology*, 2015, 62: 1723-1730. <http://doi.org/10.1002/hep.28123>
- 35 448 [14] White DL, Kanwal F, El-Serag HB. Association between nonalcoholic fatty liver  
36 449 disease and risk for hepatocellular cancer, based on systematic review. *Clin*  
37 450 *Gastroenterol Hepatol*, 2012, 10: 1342-1359.e1342.  
38 451 <http://doi.org/10.1016/j.cgh.2012.10.001>
- 39 452 [15] Nasr P, Ignatova S, Kechagias S, et al. Natural history of nonalcoholic fatty liver  
40 453 disease: A prospective follow-up study with serial biopsies. *Hepatol Commun*, 2018, 2:  
41 454 199-210. <http://doi.org/10.1002/hep4.1134>
- 42 455 [16] Estes C, Razavi H, Loomba R, et al. Modeling the epidemic of nonalcoholic fatty liver  
43 456 disease demonstrates an exponential increase in burden of disease. *Hepatology*, 2018,  
44 457 67: 123-133. <http://doi.org/10.1002/hep.29466>
- 45 458 [17] Williamson RM, Price JF, Glancy S, et al. Prevalence of and risk factors for hepatic  
46 459 steatosis and nonalcoholic Fatty liver disease in people with type 2 diabetes: the  
47 460

- 1  
2  
3 460 Edinburgh Type 2 Diabetes Study. *Diabetes Care*, 2011, 34: 1139-1144.  
4 461 <http://doi.org/10.2337/dc10-2229>
- 5  
6 462 [18] Targher G, Bertolini L, Padovani R, et al. Prevalence of nonalcoholic fatty liver disease  
7 463 and its association with cardiovascular disease among type 2 diabetic patients. *Diabetes*  
8 464 *Care*, 2007, 30: 1212-1218. <http://doi.org/10.2337/dc06-2247>
- 9  
10 465 [19] Alexander M, Loomis AK, van der Lei J, et al. Non-alcoholic fatty liver disease and risk  
11 466 of incident acute myocardial infarction and stroke: findings from matched cohort study  
12 467 of 18 million European adults. *Bmj*, 2019, 367: l5367. <http://doi.org/10.1136/bmj.l5367>
- 13  
14 468 [20] Tilg H, Moschen AR, Roden M. NAFLD and diabetes mellitus. *Nat Rev Gastroenterol*  
15 469 *Hepatol*, 2017, 14: 32-42. <http://doi.org/10.1038/nrgastro.2016.147>
- 16  
17 470 [21] Zhou Y, Llauradó G, Orešič M, et al. Circulating triacylglycerol signatures and insulin  
18 471 sensitivity in NAFLD associated with the E167K variant in TM6SF2. *J Hepatol*, 2015,  
19 472 62: 657-663. <http://doi.org/10.1016/j.jhep.2014.10.010>
- 20  
21 473 [22] Miyake T, Kumagi T, Furukawa S, et al. Non-alcoholic fatty liver disease: factors  
22 474 associated with its presence and onset. *J Gastroenterol Hepatol*, 2013, 28 Suppl 4: 71-  
23 475 78. <http://doi.org/10.1111/jgh.12251>  
24 476  
25  
26 477

## 27 28 478 **Figure legends**

29 479 **Figure 1.** Flow chart depicting the enrollment of a population with non-alcoholic fatty liver  
30 480 disease (NAFLD) for follow-up in Ningbo Zhenhai Lianhua Hospital, China.  
31 481

32  
33 482 **Figure 2.** Penalized logistic regression and Cox regression analysis were performed for risk  
34 483 factors and hazard ratios of non-alcoholic fatty liver disease (NAFLD). The following  
35 484 parameters were available from 5606 participants: Gender, age, BMI, albumin, white globulin  
36 485 ratio (WGR), white blood cell (WBC), low density lipoprotein (LDL), triglycerides (TG), high  
37 486 density lipoprotein (HDL), glutamyl transpeptidase (GLT), alanine transaminase (ALT),  
38 487 aspartate transaminase (AST), creatinine (Cr), alkaline phosphatase (ALP), blood urea nitrogen  
39 488 (Bun), Uric Acid (UA), blood glucose (Glu), systolic blood pressure (SBp), diastolic blood  
40 489 pressure (DBp), blood sedimentation (ESR), hemoglobin (HGB), platelets (PLT),  
41 490 Apolipoprotein A1 (ApoA1), Apolipoprotein B2 (ApoB), total bilirubin (TB), total protein  
42 491 (TP). Cross validation selected 16 variables to be potential predictors. The corresponding  
43 492 forest-plot is shown in (A). The AUC of these above 16 variables for NAFLD is 0.88 (B). Cox  
44 493 regression confirmed that the 16 variables were relevant for NAFLD incidence, including BMI,  
45 494 albumin, WBC, TG, HDL, GLT, ALT, Cr, UA, Glu, SBp, DBp, ESR, HGB, PLT and ApoB.  
46 495 The corresponding forest-plot is shown (C).  
47 496  
48  
49  
50  
51  
52  
53  
54  
55  
56  
57  
58  
59  
60

1  
2  
3 497 **Figure 3.** Dynamic Bayesian network analyses were performed to show the cause-effect link  
4  
5 498 between non-alcoholic fatty liver disease (NAFLD) and its potential risk factors. Three  
6  
7 499 variables, BMI, gender and triglycerides directly pointed to NAFLD. ApoB impacted on the  
8  
9 500 incidence of NAFLD through TG abundance. LDL indirectly contributed to NAFLD through  
10  
11 501 ApoB. NAFLD directly led to alterations of seven clinical parameters: ALT, DBp, SBp, TP,  
12  
13 502 albumin, HGB and UA.  
14  
15  
16  
17  
18  
19  
20  
21  
22  
23  
24  
25  
26  
27  
28  
29  
30  
31  
32  
33  
34  
35  
36  
37  
38  
39  
40  
41  
42  
43  
44  
45  
46  
47  
48  
49  
50  
51  
52  
53  
54  
55  
56  
57  
58  
59  
60

For peer review only

504 **Table 1.** Prevalence of NAFLD in 5606 persons with 11-year follow-up (2006-2016)

|                  | 2006 | 2007 | 2008 | 2009 | 2010 | 2011 | 2012 | 2013 | 2014 | 2015 | 2016 |
|------------------|------|------|------|------|------|------|------|------|------|------|------|
| <b>Total (n)</b> | 5606 | 5606 | 5606 | 5606 | 5606 | 5606 | 5606 | 5606 | 5606 | 5606 | 5606 |
| NAFLD            |      |      |      |      |      |      |      |      |      |      |      |
| (n)              | 951  | 1068 | 1247 | 1322 | 1378 | 1466 | 1524 | 1574 | 1700 | 1883 | 1976 |
| (%)              | 17   | 19.1 | 22.2 | 23.6 | 24.6 | 26.2 | 27.2 | 28.1 | 30.3 | 33.6 | 35.2 |
| <b>Male (n)</b>  | 3795 | 3795 | 3795 | 3795 | 3795 | 3795 | 3795 | 3795 | 3795 | 3795 | 3795 |
| NAFLD            |      |      |      |      |      |      |      |      |      |      |      |
| (n)              | 776  | 871  | 1014 | 1075 | 1117 | 1206 | 1244 | 1283 | 1387 | 1517 | 1569 |
| (%)              | 20.4 | 23   | 26.7 | 28.3 | 29.4 | 31.8 | 32.8 | 33.8 | 36.5 | 40   | 41.3 |
| ≤ 30ys           |      |      |      |      |      |      |      |      |      |      |      |
| (n)              | 668  | 466  | 366  | 297  | 246  | 204  | 142  | 67   | 14   | 4    | 0    |
| NAFLD            |      |      |      |      |      |      |      |      |      |      |      |
| (n)              | 97   | 71   | 57   | 46   | 35   | 35   | 30   | 17   | 3    | 1    | 0    |
| (%)              | 14.5 | 15.2 | 15.6 | 15.5 | 14.2 | 17.2 | 21.1 | 25.4 | 21.4 | 25   | 0    |
| >30, ≤           |      |      |      |      |      |      |      |      |      |      |      |
| 40ys (n)         | 1212 | 1315 | 1342 | 1258 | 1180 | 1091 | 1034 | 981  | 896  | 778  | 668  |
| NAFLD            |      |      |      |      |      |      |      |      |      |      |      |
| (n)              | 231  | 286  | 349  | 349  | 338  | 330  | 330  | 331  | 331  | 301  | 261  |
| (%)              | 19.1 | 21.7 | 26   | 27.7 | 28.6 | 30.2 | 31.9 | 33.7 | 36.9 | 38.7 | 39.1 |
| >40, ≤           |      |      |      |      |      |      |      |      |      |      |      |
| 50ys (n)         | 873  | 863  | 842  | 928  | 988  | 1022 | 1097 | 1128 | 1170 | 1201 | 1212 |
| NAFLD            |      |      |      |      |      |      |      |      |      |      |      |
| (n)              | 211  | 215  | 239  | 278  | 314  | 353  | 388  | 411  | 454  | 524  | 525  |
| (%)              | 24.2 | 24.9 | 28.4 | 30   | 31.8 | 34.5 | 35.4 | 36.4 | 38.8 | 43.6 | 43.3 |
| >50, ≤           |      |      |      |      |      |      |      |      |      |      |      |
| 60ys (n)         | 562  | 623  | 696  | 741  | 776  | 826  | 796  | 798  | 820  | 851  | 873  |
| NAFLD            |      |      |      |      |      |      |      |      |      |      |      |
| (n)              | 143  | 184  | 231  | 262  | 276  | 314  | 292  | 286  | 320  | 363  | 409  |
| (%)              | 25.4 | 29.5 | 33.2 | 35.4 | 35.6 | 38   | 36.7 | 35.8 | 39   | 42.7 | 46.8 |
| >60, ≤           |      |      |      |      |      |      |      |      |      |      |      |
| 70ys (n)         | 368  | 382  | 373  | 348  | 346  | 356  | 398  | 465  | 496  | 521  | 562  |
| NAFLD            |      |      |      |      |      |      |      |      |      |      |      |
| (n)              | 73   | 85   | 97   | 95   | 96   | 108  | 125  | 156  | 178  | 210  | 238  |
| (%)              | 19.8 | 22.3 | 26   | 27.3 | 27.7 | 30.3 | 31.4 | 33.5 | 35.9 | 40.3 | 42.3 |
| >70ys            |      |      |      |      |      |      |      |      |      |      |      |
| (n)              | 112  | 146  | 176  | 223  | 259  | 296  | 328  | 356  | 399  | 440  | 480  |
| NAFLD            |      |      |      |      |      |      |      |      |      |      |      |
| (n)              | 21   | 30   | 41   | 45   | 58   | 66   | 79   | 82   | 101  | 118  | 136  |
| (%)              | 18.8 | 20.5 | 23.3 | 20.2 | 22.4 | 22.3 | 24.1 | 23   | 25.3 | 26.8 | 28.3 |
| <b>Female</b>    |      |      |      |      |      |      |      |      |      |      |      |
| (n)              | 1811 | 1811 | 1811 | 1811 | 1811 | 1811 | 1811 | 1811 | 1811 | 1811 | 1811 |
| NAFLD            |      |      |      |      |      |      |      |      |      |      |      |
| (n)              | 175  | 197  | 233  | 247  | 261  | 260  | 280  | 291  | 313  | 366  | 407  |
| (%)              | 9.7  | 10.9 | 12.9 | 13.6 | 14.4 | 14.4 | 15.5 | 16.1 | 17.3 | 20.2 | 22.5 |
| ≤ 30ys           |      |      |      |      |      |      |      |      |      |      |      |
| (n)              | 85   | 44   | 22   | 13   | 9    | 9    | 5    | 2    | 0    | 0    | 0    |
| NAFLD            |      |      |      |      |      |      |      |      |      |      |      |
| (n)              | 3    | 1    | 1    | 1    | 0    | 0    | 0    | 0    | 0    | 0    | 0    |
| (%)              | 3.5  | 2.3  | 4.5  | 7.7  | 0    | 0    | 0    | 0    | 0    | 0    | 0    |
| >30, ≤           |      |      |      |      |      |      |      |      |      |      |      |
| 40ys (n)         | 582  | 578  | 541  | 480  | 403  | 334  | 277  | 213  | 173  | 124  | 85   |
| NAFLD            |      |      |      |      |      |      |      |      |      |      |      |
| (n)              | 17   | 21   | 25   | 22   | 24   | 18   | 18   | 13   | 15   | 14   | 12   |
| (%)              | 2.9  | 3.6  | 4.6  | 4.6  | 6    | 5.4  | 6.5  | 6.1  | 8.7  | 11.3 | 14.1 |
| >40, ≤           |      |      |      |      |      |      |      |      |      |      |      |
| 50ys (n)         | 485  | 469  | 482  | 496  | 541  | 580  | 612  | 638  | 617  | 608  | 582  |
| NAFLD            |      |      |      |      |      |      |      |      |      |      |      |
| (n)              | 31   | 31   | 35   | 41   | 47   | 54   | 61   | 66   | 65   | 81   | 86   |
| (%)              | 6.4  | 6.6  | 7.3  | 8.3  | 8.7  | 9.3  | 10   | 10.3 | 10.5 | 13.3 | 14.8 |
| >50, ≤           |      |      |      |      |      |      |      |      |      |      |      |
| 60ys (n)         | 365  | 400  | 422  | 450  | 461  | 469  | 456  | 452  | 467  | 476  | 485  |
| NAFLD            |      |      |      |      |      |      |      |      |      |      |      |
| (n)              | 56   | 67   | 85   | 86   | 90   | 88   | 88   | 83   | 88   | 98   | 109  |
| (%)              | 15.3 | 16.8 | 20.1 | 19.1 | 19.5 | 18.8 | 19.3 | 18.4 | 18.8 | 20.6 | 22.5 |
| >60, ≤           |      |      |      |      |      |      |      |      |      |      |      |
| 70ys (n)         | 244  | 260  | 262  | 267  | 266  | 266  | 280  | 301  | 314  | 337  | 365  |
| NAFLD            |      |      |      |      |      |      |      |      |      |      |      |
| (n)              | 54   | 62   | 61   | 66   | 69   | 66   | 70   | 81   | 82   | 104  | 116  |
| (%)              | 22.1 | 23.8 | 23.3 | 24.7 | 25.9 | 24.8 | 25   | 26.9 | 26.1 | 30.9 | 31.8 |
| >70ys            |      |      |      |      |      |      |      |      |      |      |      |
| (n)              | 50   | 60   | 82   | 105  | 131  | 153  | 181  | 205  | 240  | 266  | 294  |
| NAFLD            |      |      |      |      |      |      |      |      |      |      |      |
| (n)              | 14   | 15   | 26   | 31   | 31   | 34   | 43   | 48   | 63   | 69   | 84   |
| (%)              | 28   | 25   | 31.7 | 29.5 | 23.7 | 22.2 | 23.8 | 23.4 | 26.3 | 25.9 | 28.6 |

505



506 **Table 2.** Clinical outcome of NAFLD patients  
2006 - 2016

|                                           |                         | Cirrhosis | HCC | Diabetes<br>n (%) |         | Hypertension<br>n (%) |         | Hyperuricemia<br>n (%) |         |
|-------------------------------------------|-------------------------|-----------|-----|-------------------|---------|-----------------------|---------|------------------------|---------|
| Male<br>(n=506)                           |                         | 0         | 0   | 64 (12.6)         |         | 191 (37.7)            |         | 72 (14.2)              |         |
| Female (n=190)                            |                         | 0         | 0   | 22 (11.6)         |         | 85 (44.7)             |         | 43 (22.6)              |         |
| <b>2007 – 2016 (outcome of new NFLAD)</b> |                         |           |     |                   |         |                       |         |                        |         |
|                                           |                         | Cirrhosis | HCC | Diabetes          |         | Hypertension          |         | Hyperuricemia          |         |
|                                           |                         |           |     | n (%)             | P-value | n (%)                 | P-value | n (%)                  | P-value |
| Male                                      | NAFLD<br>n=138          | 0         | 0   | 14<br>(10.1)      | 0.028   | 47(34.1)              | < 0.001 | 34 (24.6)              | < 0.001 |
|                                           | Non-<br>NAFLD<br>n=2786 | 0         | 0   | 157<br>(5.6)      |         | 259 (9.3)             |         | 284 (10.2)             |         |
| Female                                    | NAFLD<br>n=47           | 0         | 0   | 5 (10.6)          | 0.014   | 21 (44.7)             | < 0.001 | 8 (17)                 | < 0.001 |
|                                           | Non-<br>NAFLD<br>n=1761 | 0         | 0   | 54 (3.1)          |         | 324<br>(18.4)         |         | 84 (4.8)               |         |

507

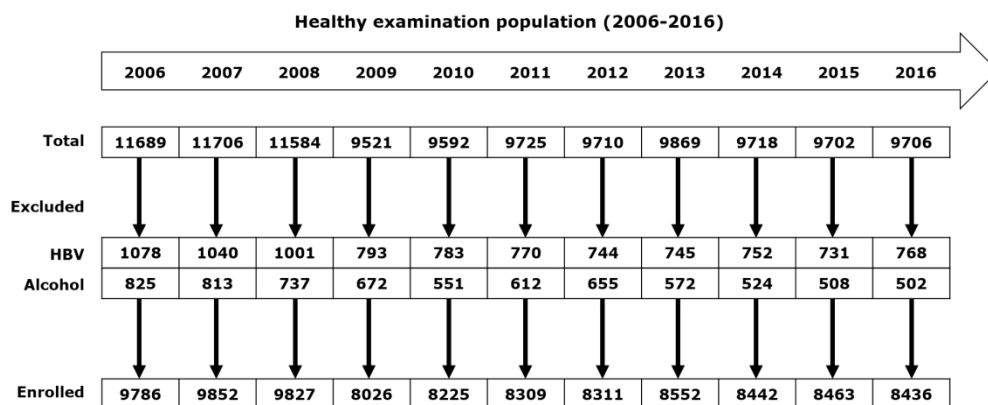

Flow chart depicting the enrollment of a population with non-alcoholic fatty liver disease (NAFLD) for follow-up in Ningbo Zhenhai Lianhua Hospital, China.

335x136mm (150 x 150 DPI)

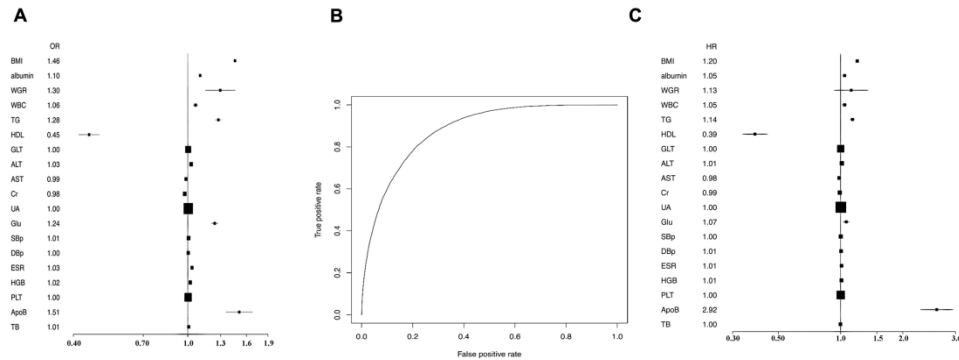

Penalized logistic regression and Cox regression analysis were performed for risk factors and hazard ratios of non-alcoholic fatty liver disease (NAFLD). The following parameters were available from 5606 participants: Gender, age, BMI, albumin, white globulin ratio (WGR), white blood cell (WBC), low density lipoprotein (LDL), triglycerides (TG), high density lipoprotein (HDL), glutamyl transpeptidase (GLT), alanine transaminase (ALT), aspartate transaminase (AST), creatinine (Cr), alkaline phosphatase (ALP), blood urea nitrogen (Bun), Uric Acid (UA), blood glucose (Glu), systolic blood pressure (SBp), diastolic blood pressure (DBp), blood sedimentation (ESR), hemoglobin (HGB), platelets (PLT), Apolipoprotein A1 (ApoA1), Apolipoprotein B2 (ApoB), total bilirubin (TB), total protein (TP). Cross validation selected 16 variables to be potential predictors. The corresponding forest-plot is shown in (A). The AUC of these above 16 variables for NAFLD is 0.88 (B). Cox regression confirmed that the 16 variables were relevant for NAFLD incidence, including BMI, albumin, WBC, TG, HDL, GLT, ALT, Cr, UA, Glu, SBp, DBp, ESR, HGB, PLT and ApoB. The corresponding forest-plot is shown (C).

344x124mm (300 x 300 DPI)

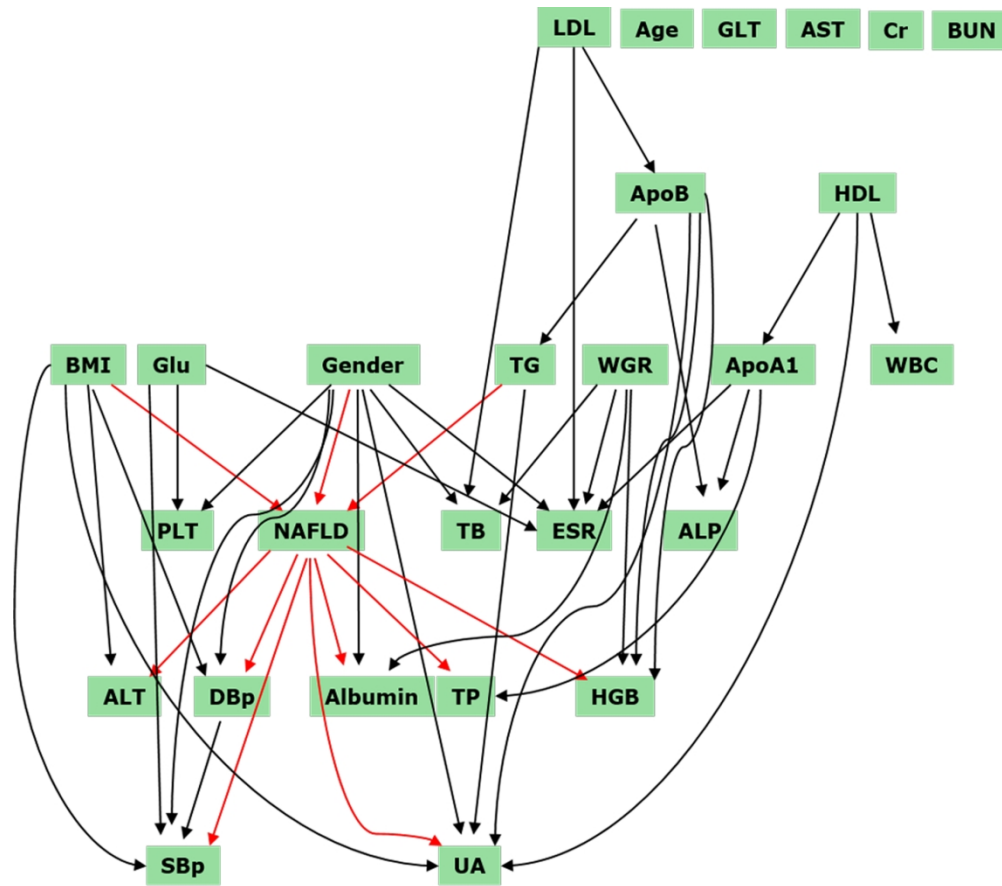

Dynamic Bayesian network analyses were performed to show the cause-effect link between non-alcoholic fatty liver disease (NAFLD) and its potential risk factors. Three variables, BMI, gender and triglycerides directly pointed to NAFLD. ApoB impacted on the incidence of NAFLD through TG abundance. LDL indirectly contributed to NAFLD through ApoB. NAFLD directly led to alterations of seven clinical parameters: ALT, DBp, SBp, TP, albumin, HGB and UA.

522x461mm (96 x 96 DPI)

1  
2  
3 **Nonalcoholic fatty liver disease increased risk of metabolic diseases, but not severe liver**  
4 **disease: an eleven-year follow-up study**

5  
6 Xiaoping Tang, Yanyan Shi, Juan Du, Keming Hu, Tingting Zhou, Lan Chen, Yanming  
7 Zhang, Fujun Li, Huier Zhang, Roman Liebe, Christoph Meyer, Steven Dooley, Zhongwei  
8  
9 Zhu, Hong-Lei Weng, Jinzhu Jia, Tong Huang  
10  
11  
12  
13  
14  
15  
16  
17  
18  
19  
20  
21  
22  
23  
24  
25  
26  
27  
28  
29  
30  
31  
32  
33  
34  
35  
36  
37  
38  
39  
40  
41  
42  
43  
44  
45  
46  
47  
48  
49  
50  
51  
52  
53  
54  
55  
56  
57  
58  
59  
60

For peer review only

**Supplementary Table 1.** Parameters measured in the annual health examinations.

|                                                 |
|-------------------------------------------------|
| Age                                             |
| Albumin                                         |
| AKP (alkaline phosphatase)                      |
| ALT ( alanine transaminase)                     |
| ApoA1 (Apolipoprotein A1)                       |
| ApoB (Apolipoprotein B2)                        |
| AST (aspartate transaminase)                    |
| BMI (Body mass index)                           |
| BLRV (whole blood low shear reduced viscosity)  |
| BLRI (relative index of whole blood low shear)  |
| BHRV (whole blood high shear reduced viscosity) |
| BHRI (relative index of whole blood high shear) |
| BVV200 (Whole blood viscosity value)            |
| BUN (blood urea nitrogen)                       |
| BUS (ultrasound prompt)                         |
| CRP (high sensitive C-reactive protein)         |
| Cr (creatinine)                                 |
| CA (carotid atherosclerosis )                   |
| DBIL (Direct bilirubin)                         |
| DBp (diastolic blood pressure)                  |
| DM (type II diabetes)                           |
| ESR (Blood sedimentation)                       |
| ESRKV (Blood sedimentation equation K value)    |
| Gender                                          |
| GLT (glutamyl transpeptidase)                   |
| Glucose                                         |
| HBP (Hypertension)                              |
| HBX (red blood cell deformation index TK)       |
| HCT (Hematocrit)                                |
| HCY (Homocysteine)                              |
| HDL (high density lipoprotein C)                |
| Height                                          |
| HGB (hemoglobin)                                |
| LDL (low density lipoprotein C)                 |
| LVH (left ventricular hypertrophy)              |
| MPV (mean platelet volume)                      |
| NAFLD (non-alcoholic fatty liver disease)       |
| PhyExa (physical examination results)           |
| PV (plasma viscosity)                           |
| PDW (Platelet distribution width)               |
| PLT (platelet)                                  |
| PCT ( prothrombin consumption time)             |
| RBC (red blood cell count)                      |
| SBp (systolic blood pressure)                   |
| TB (Total Bilirubin)                            |
| TC (Total cholesterol)                          |
| TG (Triglyceride)                               |

1  
2  
3  
4  
5  
6  
7  
8  
9  
10  
11  
12  
13  
14  
15  
16  
17  
18  
19  
20  
21  
22  
23  
24  
25  
26  
27  
28  
29  
30  
31  
32  
33  
34  
35  
36  
37  
38  
39  
40  
41  
42  
43  
44  
45  
46  
47  
48  
49  
50  
51  
52  
53  
54  
55  
56  
57  
58  
59  
60

|                              |
|------------------------------|
| TP (total protein)           |
| UA (uric acid)               |
| Waist                        |
| Weight                       |
| WGR (white globulin ratio)   |
| WBC (white blood cell count) |

For peer review only

**Supplementary Table 2.** Prevalence of NAFLD in an eastern Chinese population (2006-2016)

|                   | 2006 | 2007 | 2008 | 2009 | 2010 | 2011 | 2012 | 2013 | 2014 | 2015 | 2016 |
|-------------------|------|------|------|------|------|------|------|------|------|------|------|
| <b>Total (n)</b>  | 9786 | 9852 | 9827 | 8026 | 8225 | 8309 | 8311 | 8552 | 8442 | 8463 | 8436 |
| NAFLD (n)         | 1687 | 1875 | 2161 | 1797 | 1871 | 1943 | 2033 | 2169 | 2356 | 2610 | 2734 |
| (%)               | 17.2 | 19.0 | 22.0 | 22.4 | 22.7 | 23.4 | 24.5 | 25.4 | 27.9 | 30.8 | 32.4 |
| <b>Male (n)</b>   | 6834 | 6872 | 6857 | 5468 | 5640 | 5692 | 5680 | 5891 | 5820 | 5812 | 5816 |
| NAFLD (n)         | 1399 | 1555 | 1790 | 1419 | 1488 | 1562 | 1616 | 1734 | 1896 | 2081 | 2152 |
| (%)               | 20.5 | 22.6 | 26.1 | 26.0 | 26.4 | 27.4 | 28.5 | 29.4 | 32.6 | 35.8 | 37.0 |
| ≤ 30ys (n)        | 1196 | 938  | 729  | 826  | 980  | 1092 | 1068 | 1163 | 1013 | 964  | 927  |
| NAFLD (n)         | 155  | 112  | 100  | 78   | 83   | 94   | 108  | 157  | 171  | 208  | 200  |
| (%)               | 13.0 | 11.9 | 13.7 | 9.4  | 8.5  | 8.6  | 10.1 | 13.5 | 16.9 | 21.6 | 21.6 |
| >30, ≤ 40ys (n)   | 2144 | 2292 | 2353 | 1504 | 1395 | 1248 | 1150 | 1096 | 1028 | 970  | 953  |
| NAFLD (n)         | 419  | 502  | 590  | 412  | 386  | 375  | 358  | 367  | 372  | 357  | 344  |
| (%)               | 19.5 | 21.9 | 25.1 | 27.4 | 27.7 | 30.0 | 31.1 | 33.5 | 36.2 | 36.8 | 36.1 |
| >40, ≤ 50ys (n)   | 1480 | 1465 | 1450 | 1107 | 1183 | 1211 | 1279 | 1299 | 1339 | 1360 | 1347 |
| NAFLD (n)         | 358  | 376  | 429  | 334  | 380  | 418  | 456  | 478  | 517  | 595  | 577  |
| (%)               | 24.2 | 25.7 | 29.6 | 30.2 | 32.1 | 34.5 | 35.7 | 36.8 | 38.6 | 43.8 | 42.8 |
| >50, ≤ 60ys (n)   | 1084 | 1180 | 1314 | 1033 | 1055 | 1068 | 1008 | 979  | 978  | 984  | 978  |
| NAFLD (n)         | 267  | 341  | 415  | 352  | 364  | 394  | 361  | 350  | 385  | 416  | 456  |
| (%)               | 24.6 | 28.9 | 31.6 | 34.1 | 34.5 | 36.9 | 35.8 | 35.8 | 39.4 | 42.3 | 46.6 |
| >60, ≤ 70ys (n)   | 635  | 655  | 622  | 553  | 547  | 574  | 632  | 774  | 834  | 879  | 937  |
| NAFLD (n)         | 137  | 147  | 165  | 151  | 159  | 172  | 202  | 243  | 292  | 331  | 382  |
| (%)               | 21.6 | 22.4 | 26.5 | 27.3 | 29.1 | 30.0 | 32.0 | 31.4 | 35.0 | 37.7 | 40.8 |
| >70ys (n)         | 295  | 342  | 389  | 445  | 480  | 499  | 543  | 580  | 628  | 655  | 674  |
| NAFLD (n)         | 63   | 77   | 91   | 92   | 116  | 109  | 131  | 139  | 159  | 174  | 193  |
| (%)               | 21.4 | 22.5 | 23.4 | 20.7 | 24.2 | 21.8 | 24.1 | 24.0 | 25.3 | 26.6 | 28.6 |
| <b>Female (n)</b> | 2952 | 2980 | 2970 | 2558 | 2585 | 2617 | 2631 | 2661 | 2622 | 2651 | 2620 |
| NAFLD (n)         | 288  | 320  | 371  | 378  | 383  | 381  | 417  | 435  | 460  | 529  | 582  |
| (%)               | 9.8  | 10.7 | 12.5 | 14.8 | 14.8 | 14.6 | 15.8 | 16.3 | 17.5 | 20.0 | 22.2 |
| ≤ 30ys (n)        | 209  | 167  | 147  | 143  | 213  | 251  | 248  | 270  | 239  | 244  | 214  |
| NAFLD (n)         | 5    | 4    | 4    | 1    | 0    | 1    | 2    | 8    | 9    | 14   | 13   |
| (%)               | 2.4  | 2.4  | 2.7  | 0.7  | 0.0  | 0.4  | 0.8  | 3.0  | 3.8  | 5.7  | 6.1  |
| >30, ≤ 40ys (n)   | 934  | 924  | 869  | 596  | 496  | 415  | 348  | 276  | 232  | 198  | 177  |
| NAFLD (n)         | 33   | 29   | 36   | 28   | 28   | 24   | 23   | 17   | 19   | 20   | 20   |
| (%)               | 3.5  | 3.1  | 4.1  | 4.7  | 5.6  | 5.8  | 6.6  | 6.2  | 8.2  | 10.1 | 11.3 |
| >40, ≤ 50ys (n)   | 801  | 785  | 776  | 627  | 666  | 701  | 733  | 754  | 707  | 704  | 658  |
| NAFLD (n)         | 54   | 60   | 63   | 62   | 69   | 76   | 85   | 88   | 84   | 98   | 99   |
| (%)               | 6.7  | 7.6  | 8.1  | 9.9  | 10.4 | 10.8 | 11.6 | 11.7 | 11.9 | 13.9 | 15.0 |
| >50, ≤ 60ys (n)   | 536  | 604  | 651  | 643  | 647  | 659  | 641  | 638  | 665  | 680  | 689  |
| NAFLD (n)         | 78   | 100  | 133  | 131  | 132  | 128  | 132  | 132  | 131  | 157  | 171  |
| (%)               | 14.6 | 16.6 | 20.4 | 20.4 | 20.4 | 19.4 | 20.6 | 20.7 | 19.7 | 23.1 | 24.8 |
| >60, ≤ 70ys (n)   | 367  | 368  | 367  | 358  | 347  | 347  | 380  | 417  | 438  | 461  | 494  |
| NAFLD (n)         | 94   | 96   | 92   | 99   | 95   | 92   | 106  | 117  | 123  | 140  | 159  |
| (%)               | 25.6 | 26.1 | 25.1 | 27.7 | 27.4 | 26.5 | 27.9 | 28.1 | 28.1 | 30.4 | 32.2 |
| >70ys (n)         | 105  | 132  | 160  | 191  | 216  | 244  | 281  | 306  | 341  | 364  | 388  |
| NAFLD (n)         | 24   | 31   | 43   | 57   | 59   | 60   | 69   | 73   | 94   | 100  | 120  |
| (%)               | 22.9 | 23.5 | 26.9 | 29.8 | 27.3 | 24.6 | 24.6 | 23.9 | 27.6 | 27.5 | 30.9 |



**Supplementary Table 3.** Prevalence of NAFLD in obese persons (BMI > 25) (2006-2016)

|                   | 2006 | 2007 | 2008 | 2009 | 2010 | 2011 | 2012 | 2013 | 2014 | 2015 | 2016 |
|-------------------|------|------|------|------|------|------|------|------|------|------|------|
| <b>Total (n)</b>  | 2445 | 2674 | 2749 | 2119 | 2314 | 2271 | 2218 | 2593 | 2159 | 2121 | 2106 |
| NAFLD             |      |      |      |      |      |      |      |      |      |      |      |
| (n)               | 1104 | 1256 | 1397 | 1103 | 1231 | 1218 | 1239 | 1387 | 1309 | 1384 | 1414 |
| (%)               | 45.2 | 47   | 50.8 | 52.1 | 53.2 | 53.6 | 55.9 | 53.5 | 60.6 | 65.3 | 67.1 |
| <b>Male (n)</b>   | 1927 | 2163 | 2232 | 1663 | 1822 | 1813 | 1744 | 2086 | 1728 | 1716 | 1699 |
| NAFLD             |      |      |      |      |      |      |      |      |      |      |      |
| (n)               | 912  | 1053 | 1180 | 885  | 1002 | 1001 | 1010 | 1153 | 1086 | 1147 | 1173 |
| (%)               | 47.3 | 48.7 | 52.9 | 53.2 | 55   | 55.2 | 57.9 | 55.3 | 62.8 | 66.8 | 69   |
| ≤ 30ys (n)        | 213  | 202  | 174  | 156  | 190  | 227  | 220  | 293  | 224  | 212  | 200  |
| NAFLD             |      |      |      |      |      |      |      |      |      |      |      |
| (n)               | 112  | 86   | 67   | 53   | 64   | 70   | 79   | 115  | 119  | 132  | 126  |
| (%)               | 52.6 | 42.6 | 38.5 | 34   | 33.7 | 30.8 | 35.9 | 39.2 | 53.1 | 62.3 | 63   |
| >30, ≤ 40ys (n)   | 549  | 640  | 689  | 427  | 428  | 375  | 346  | 407  | 310  | 302  | 291  |
| NAFLD             |      |      |      |      |      |      |      |      |      |      |      |
| (n)               | 269  | 325  | 388  | 259  | 250  | 229  | 226  | 247  | 229  | 211  | 206  |
| (%)               | 49   | 50.8 | 56.3 | 60.7 | 58.4 | 61.1 | 65.3 | 60.7 | 73.9 | 69.9 | 70.8 |
| >40, ≤ 50ys (n)   | 433  | 456  | 468  | 353  | 414  | 423  | 431  | 517  | 443  | 437  | 425  |
| NAFLD             |      |      |      |      |      |      |      |      |      |      |      |
| (n)               | 210  | 225  | 263  | 185  | 248  | 264  | 276  | 321  | 293  | 323  | 310  |
| (%)               | 48.5 | 49.3 | 56.2 | 52.4 | 59.9 | 62.4 | 64   | 62.1 | 66.1 | 73.9 | 72.9 |
| >50, ≤ 60ys (n)   | 351  | 447  | 491  | 364  | 390  | 392  | 353  | 381  | 312  | 309  | 303  |
| NAFLD             |      |      |      |      |      |      |      |      |      |      |      |
| (n)               | 173  | 240  | 280  | 222  | 236  | 247  | 209  | 226  | 207  | 217  | 232  |
| (%)               | 49.3 | 53.7 | 57   | 61   | 60.5 | 63   | 59.2 | 59.3 | 66.3 | 70.2 | 76.6 |
| >60, ≤ 70ys (n)   | 265  | 274  | 249  | 213  | 213  | 209  | 222  | 291  | 263  | 262  | 281  |
| NAFLD             |      |      |      |      |      |      |      |      |      |      |      |
| (n)               | 98   | 111  | 113  | 102  | 113  | 113  | 133  | 155  | 150  | 159  | 189  |
| (%)               | 37   | 40.5 | 45.4 | 47.9 | 53.1 | 54.1 | 59.9 | 53.3 | 57   | 60.7 | 67.3 |
| >70ys (n)         | 116  | 144  | 161  | 150  | 187  | 187  | 172  | 197  | 176  | 194  | 199  |
| NAFLD             |      |      |      |      |      |      |      |      |      |      |      |
| (n)               | 50   | 66   | 69   | 64   | 91   | 78   | 87   | 89   | 88   | 105  | 110  |
| (%)               | 43.1 | 45.8 | 42.9 | 42.7 | 48.7 | 41.7 | 50.6 | 45.2 | 50   | 54.1 | 55.3 |
| <b>Female (n)</b> | 518  | 511  | 517  | 456  | 492  | 458  | 474  | 507  | 431  | 405  | 407  |
| NAFLD             |      |      |      |      |      |      |      |      |      |      |      |
| (n)               | 192  | 203  | 217  | 218  | 229  | 217  | 229  | 234  | 223  | 237  | 241  |
| (%)               | 37.1 | 39.7 | 42   | 47.8 | 46.5 | 47.4 | 48.3 | 46.2 | 51.7 | 58.5 | 59.2 |
| ≤ 30ys (n)        | 15   | 5    | 11   | 9    | 6    | 12   | 13   | 15   | 13   | 14   | 16   |
| NAFLD             |      |      |      |      |      |      |      |      |      |      |      |
| (n)               | 3    | 1    | 2    | 0    | 0    | 1    | 2    | 5    | 5    | 5    | 7    |
| (%)               | 20   | 20   | 18.2 | 0    | 0    | 8.3  | 15.4 | 33.3 | 38.5 | 35.7 | 43.8 |
| >30, ≤ 40ys (n)   | 69   | 78   | 75   | 46   | 50   | 36   | 36   | 31   | 21   | 20   | 18   |
| NAFLD             |      |      |      |      |      |      |      |      |      |      |      |
| (n)               | 20   | 18   | 22   | 18   | 22   | 14   | 17   | 9    | 10   | 11   | 11   |
| (%)               | 29   | 23.1 | 29.3 | 39.1 | 44   | 38.9 | 47.2 | 29   | 47.6 | 55   | 61.1 |
| >40, ≤ 50ys (n)   | 101  | 107  | 109  | 83   | 90   | 88   | 94   | 115  | 89   | 76   | 66   |
| NAFLD             |      |      |      |      |      |      |      |      |      |      |      |
| (n)               | 37   | 41   | 41   | 34   | 36   | 39   | 44   | 48   | 45   | 46   | 35   |
| (%)               | 36.6 | 38.3 | 37.6 | 41   | 40   | 44.3 | 46.8 | 41.7 | 50.6 | 60.5 | 53   |
| >50, ≤ 60ys (n)   | 141  | 146  | 146  | 151  | 155  | 137  | 121  | 125  | 101  | 92   | 93   |
| NAFLD             |      |      |      |      |      |      |      |      |      |      |      |
| (n)               | 49   | 56   | 63   | 72   | 72   | 66   | 56   | 61   | 53   | 62   | 61   |
| (%)               | 34.8 | 38.4 | 43.2 | 47.7 | 46.5 | 48.2 | 46.3 | 48.8 | 52.5 | 67.4 | 65.6 |
| >60, ≤ 70ys (n)   | 141  | 127  | 115  | 103  | 115  | 105  | 120  | 127  | 109  | 105  | 105  |
| NAFLD             |      |      |      |      |      |      |      |      |      |      |      |
| (n)               | 64   | 66   | 58   | 59   | 65   | 59   | 68   | 67   | 57   | 63   | 66   |
| (%)               | 45.4 | 52   | 50.4 | 57.3 | 56.5 | 56.2 | 56.7 | 52.8 | 52.3 | 60   | 62.9 |
| >70ys (n)         | 51   | 48   | 61   | 64   | 76   | 80   | 90   | 94   | 98   | 98   | 109  |
| NAFLD             |      |      |      |      |      |      |      |      |      |      |      |
| (n)               | 19   | 21   | 31   | 35   | 34   | 38   | 42   | 44   | 53   | 50   | 61   |
| (%)               | 37.3 | 43.8 | 50.8 | 54.7 | 44.7 | 47.5 | 46.7 | 46.8 | 54.1 | 51   | 56   |

**Supplementary Table 4.** Logistic regression for risk factors of NAFLD

|             | Estimate | Std. Error | z value | OR       | 2.5%CI   | 97.5%CI  | Pr(> z )   |
|-------------|----------|------------|---------|----------|----------|----------|------------|
| (Intercept) | -21.63   | 0.3151     | -68.631 | 4.05E-10 | 2.18E-10 | 7.49E-10 | < 0.001*** |
| BMI         | 0.3791   | 0.005224   | 72.563  | 1.460966 | 1.446132 | 1.476054 | < 0.001*** |
| albumin     | 0.0994   | 0.005635   | 17.64   | 1.104513 | 1.092391 | 1.116791 | < 0.001*** |
| WGR         | 0.2666   | 0.06118    | 4.357   | 1.305464 | 1.157849 | 1.471676 | < 0.001*** |
| WBC         | 0.06149  | 0.008274   | 7.432   | 1.063423 | 1.046307 | 1.080801 | < 0.001*** |
| TG          | 0.2447   | 0.01213    | 20.17   | 1.277201 | 1.247335 | 1.308081 | < 0.001*** |
| HDL         | -0.7862  | 0.04247    | -18.511 | 0.45558  | 0.419127 | 0.495053 | < 0.001*** |
| GLT         | 0.002947 | 0.000358   | 8.242   | 1.002952 | 1.002255 | 1.003661 | < 0.001*** |
| ALT         | 0.02717  | 0.001056   | 25.738  | 1.027538 | 1.025425 | 1.029676 | < 0.001*** |
| AST         | -0.0142  | 0.001834   | -7.745  | 0.985896 | 0.982336 | 0.989418 | < 0.001*** |
| Cr          | -0.02375 | 0.001025   | -23.177 | 0.976528 | 0.974562 | 0.978485 | < 0.001*** |
| ALP         | 0.000909 | 0.000547   | 1.661   | 1.000909 | 0.999835 | 1.001982 | 0.09664    |
| UA          | 0.00433  | 0.000176   | 24.542  | 1.004339 | 1.003992 | 1.004687 | < 0.001*** |
| Glu         | 0.2159   | 0.01197    | 18.044  | 1.241037 | 1.212327 | 1.270567 | < 0.001*** |
| SBp         | 0.006338 | 0.001014   | 6.252   | 1.006358 | 1.00436  | 1.008359 | < 0.001*** |
| DBp         | 0.003561 | 0.001546   | 2.303   | 1.003567 | 1.000532 | 1.006614 | 0.021265*  |
| ESR         | 0.03401  | 0.001808   | 18.808  | 1.034593 | 1.030931 | 1.038265 | < 0.001*** |
| HGB         | 0.01966  | 0.00121    | 16.252  | 1.019853 | 1.017441 | 1.022277 | < 0.001*** |
| PLT         | 0.002588 | 0.000249   | 10.401  | 1.002592 | 1.002102 | 1.003081 | < 0.001*** |
| ApoB        | 0.4143   | 0.05413    | 7.654   | 1.513337 | 1.361002 | 1.6827   | < 0.001*** |
| TB          | 0.00778  | 0.002057   | 3.782   | 1.00781  | 1.003739 | 1.011865 | < 0.001*** |

**Supplementary Table 5.** Cox regression for risk factors of NAFLD

|         | se(coef) | z value | coef     | HR       | lower .95 | upper .95 | Pr(> z )    |
|---------|----------|---------|----------|----------|-----------|-----------|-------------|
| BMI     | 0.005327 | 35.102  | 0.186996 | 1.205622 | 1.1930993 | 1.2182761 | < 0.001***  |
| Albumin | 0.009655 | 4.656   | 0.04495  | 1.045976 | 1.0263691 | 1.0659575 | < 0.001***  |
| WGR     | 0.096408 | 1.326   | 0.12788  | 1.136417 | 0.9407519 | 1.3727778 | 0.184691    |
| WBC     | 0.010893 | 4.087   | 0.044521 | 1.045527 | 1.0234412 | 1.0680884 | < 0.001***  |
| TG      | 0.011283 | 11.755  | 0.132633 | 1.141831 | 1.1168563 | 1.1673638 | < 0.001***  |
| HDL     | 0.071682 | -13.214 | -0.94719 | 0.387829 | 0.3369955 | 0.4463302 | < 0.001***  |
| GLT     | 0.000494 | 2.601   | 0.001285 | 1.001285 | 1.0003166 | 1.0022553 | 0.009302**  |
| ALT     | 0.001478 | 9.309   | 0.013757 | 1.013853 | 1.0109201 | 1.0167934 | < 0.001***  |
| AST     | 0.003074 | -4.965  | -0.01526 | 0.984853 | 0.978937  | 0.990805  | < 0.001***  |
| Cr      | 0.001677 | -5.609  | -0.00941 | 0.990637 | 0.9873861 | 0.9939885 | < 0.001***  |
| ALP     | 0.000871 | 1.451   | 0.001263 | 1.001264 | 0.9995565 | 1.0029745 | 0.146888    |
| UA      | 0.000277 | 11.14   | 0.003085 | 1.003089 | 1.0025451 | 1.0036338 | < 0.001***  |
| Glu     | 0.016397 | 3.771   | 0.061837 | 1.063788 | 1.0301446 | 1.0985309 | 0.000162*** |
| SBp     | 0.001643 | 1.485   | 0.00244  | 1.002443 | 0.9992205 | 1.0056749 | 0.137485    |
| DBp     | 0.002517 | 2.383   | 0.005996 | 1.006014 | 1.0010643 | 1.0109889 | 0.01719*    |
| ESR     | 0.003054 | 3.429   | 0.010473 | 1.010528 | 1.0044965 | 1.0165956 | 0.000606*** |
| HGB     | 0.002056 | 4.507   | 0.009269 | 1.009312 | 1.0052523 | 1.0133885 | < 0.001***  |
| PLT     | 0.000389 | 3.318   | 0.001291 | 1.001292 | 1.0005286 | 1.0020554 | 0.000905*** |
| ApoB    | 0.092419 | 11.569  | 1.069192 | 2.913026 | 2.4303962 | 3.4914963 | < 0.001***  |
| TB      | 0.003316 | -0.216  | -0.00072 | 0.999283 | 0.9928097 | 1.0057994 | 0.828863    |

## STROBE Statement—checklist of items that should be included in reports of observational studies

|                              | Item No | Recommendation                                                                                                                                                                                                                                                                                                                                                                                                                                                         | Page No |
|------------------------------|---------|------------------------------------------------------------------------------------------------------------------------------------------------------------------------------------------------------------------------------------------------------------------------------------------------------------------------------------------------------------------------------------------------------------------------------------------------------------------------|---------|
| <b>Title and abstract</b>    | 1       | (a) Indicate the study's design with a commonly used term in the title or the abstract                                                                                                                                                                                                                                                                                                                                                                                 | 3       |
|                              |         | (b) Provide in the abstract an informative and balanced summary of what was done and what was found                                                                                                                                                                                                                                                                                                                                                                    | 3-4     |
| <b>Introduction</b>          |         |                                                                                                                                                                                                                                                                                                                                                                                                                                                                        |         |
| Background/rationale         | 2       | Explain the scientific background and rationale for the investigation being reported                                                                                                                                                                                                                                                                                                                                                                                   | 5       |
| Objectives                   | 3       | State specific objectives, including any prespecified hypotheses                                                                                                                                                                                                                                                                                                                                                                                                       | 5       |
| <b>Methods</b>               |         |                                                                                                                                                                                                                                                                                                                                                                                                                                                                        |         |
| Study design                 | 4       | Present key elements of study design early in the paper                                                                                                                                                                                                                                                                                                                                                                                                                | 5-6     |
| Setting                      | 5       | Describe the setting, locations, and relevant dates, including periods of recruitment, exposure, follow-up, and data collection                                                                                                                                                                                                                                                                                                                                        | 5-6     |
| Participants                 | 6       | (a) <i>Cohort study</i> —Give the eligibility criteria, and the sources and methods of selection of participants. Describe methods of follow-up<br><i>Case-control study</i> —Give the eligibility criteria, and the sources and methods of case ascertainment and control selection. Give the rationale for the choice of cases and controls<br><i>Cross-sectional study</i> —Give the eligibility criteria, and the sources and methods of selection of participants | 5-6     |
|                              |         | (b) <i>Cohort study</i> —For matched studies, give matching criteria and number of exposed and unexposed<br><i>Case-control study</i> —For matched studies, give matching criteria and the number of controls per case                                                                                                                                                                                                                                                 |         |
| Variables                    | 7       | Clearly define all outcomes, exposures, predictors, potential confounders, and effect modifiers. Give diagnostic criteria, if applicable                                                                                                                                                                                                                                                                                                                               | 6       |
| Data sources/<br>measurement | 8*      | For each variable of interest, give sources of data and details of methods of assessment (measurement). Describe comparability of assessment methods if there is more than one group                                                                                                                                                                                                                                                                                   |         |
| Bias                         | 9       | Describe any efforts to address potential sources of bias                                                                                                                                                                                                                                                                                                                                                                                                              | 6       |
| Study size                   | 10      | Explain how the study size was arrived at                                                                                                                                                                                                                                                                                                                                                                                                                              | 6       |
| Quantitative variables       | 11      | Explain how quantitative variables were handled in the analyses. If applicable, describe which groupings were chosen and why                                                                                                                                                                                                                                                                                                                                           | 6       |
| Statistical methods          | 12      | (a) Describe all statistical methods, including those used to control for confounding                                                                                                                                                                                                                                                                                                                                                                                  | 6       |
|                              |         | (b) Describe any methods used to examine subgroups and interactions                                                                                                                                                                                                                                                                                                                                                                                                    | 6       |
|                              |         | (c) Explain how missing data were addressed                                                                                                                                                                                                                                                                                                                                                                                                                            | 6       |
|                              |         | (d) <i>Cohort study</i> —If applicable, explain how loss to follow-up was addressed<br><i>Case-control study</i> —If applicable, explain how matching of cases and controls was addressed<br><i>Cross-sectional study</i> —If applicable, describe analytical methods taking account of sampling strategy                                                                                                                                                              | 6       |
|                              |         | (e) Describe any sensitivity analyses                                                                                                                                                                                                                                                                                                                                                                                                                                  | 6       |

Continued on next page

1  
2  
3  
4  
5  
6  
7  
8  
9  
10  
11  
12  
13  
14  
15  
16  
17  
18  
19  
20  
21  
22  
23  
24  
25  
26  
27  
28  
29  
30  
31  
32  
33  
34  
35  
36  
37  
38  
39  
40  
41  
42  
43  
44  
45  
46  
47  
48  
49  
50  
51  
52  
53  
54  
55  
56  
57  
58  
59  
60**Results**

|                  |     |                                                                                                                                                                                                                                                                                                                                                                                                               |                      |
|------------------|-----|---------------------------------------------------------------------------------------------------------------------------------------------------------------------------------------------------------------------------------------------------------------------------------------------------------------------------------------------------------------------------------------------------------------|----------------------|
| Participants     | 13* | (a) Report numbers of individuals at each stage of study—eg numbers potentially eligible, examined for eligibility, confirmed eligible, included in the study, completing follow-up, and analysed<br>(b) Give reasons for non-participation at each stage<br>(c) Consider use of a flow diagram                                                                                                               |                      |
| Descriptive data | 14* | (a) Give characteristics of study participants (eg demographic, clinical, social) and information on exposures and potential confounders<br>(b) Indicate number of participants with missing data for each variable of interest<br>(c) <i>Cohort study</i> —Summarise follow-up time (eg, average and total amount)                                                                                           |                      |
| Outcome data     | 15* | <i>Cohort study</i> —Report numbers of outcome events or summary measures over time<br><i>Case-control study</i> —Report numbers in each exposure category, or summary measures of exposure<br><i>Cross-sectional study</i> —Report numbers of outcome events or summary measures                                                                                                                             |                      |
| Main results     | 16  | (a) Give unadjusted estimates and, if applicable, confounder-adjusted estimates and their precision (eg, 95% confidence interval). Make clear which confounders were adjusted for and why they were included<br>(b) Report category boundaries when continuous variables were categorized<br>(c) If relevant, consider translating estimates of relative risk into absolute risk for a meaningful time period | 7-10<br>7-10<br>7-10 |
| Other analyses   | 17  | Report other analyses done—eg analyses of subgroups and interactions, and sensitivity analyses                                                                                                                                                                                                                                                                                                                | 7-10                 |

**Discussion**

|                  |    |                                                                                                                                                                            |       |
|------------------|----|----------------------------------------------------------------------------------------------------------------------------------------------------------------------------|-------|
| Key results      | 18 | Summarise key results with reference to study objectives                                                                                                                   | 10    |
| Limitations      | 19 | Discuss limitations of the study, taking into account sources of potential bias or imprecision. Discuss both direction and magnitude of any potential bias                 | 11-13 |
| Interpretation   | 20 | Give a cautious overall interpretation of results considering objectives, limitations, multiplicity of analyses, results from similar studies, and other relevant evidence | 11-13 |
| Generalisability | 21 | Discuss the generalisability (external validity) of the study results                                                                                                      | 13    |

**Other information**

|         |    |                                                                                                                                                               |   |
|---------|----|---------------------------------------------------------------------------------------------------------------------------------------------------------------|---|
| Funding | 22 | Give the source of funding and the role of the funders for the present study and, if applicable, for the original study on which the present article is based | 2 |
|---------|----|---------------------------------------------------------------------------------------------------------------------------------------------------------------|---|

\*Give information separately for cases and controls in case-control studies and, if applicable, for exposed and unexposed groups in cohort and cross-sectional studies.

**Note:** An Explanation and Elaboration article discusses each checklist item and gives methodological background and published examples of transparent reporting. The STROBE checklist is best used in conjunction with this article (freely available on the Web sites of PLoS Medicine at <http://www.plosmedicine.org/>, Annals of Internal Medicine at <http://www.annals.org/>, and Epidemiology at <http://www.epidem.com/>). Information on the STROBE Initiative is available at [www.strobe-statement.org](http://www.strobe-statement.org).
