# Supplementary material for: Clinical outcome of non-alcoholic fatty liver disease: an 11-year follow-up study
Source: HighWire-hosted journal article supplement (doi:10.1136/bmjopen-2021-054891), 2022-06-01
Supplement: bmjopen-2021-054891supp001_data_supplement.pdf [file bmjopen-2021-054891supp001_data_supplement.pdf]

**Nonalcoholic fatty liver disease increased risk of metabolic diseases, but not severe liver disease: an eleven-year follow-up study**

Xiaoping Tang, Yanyan Shi, Juan Du, Keming Hu, Tingting Zhou, Lan Chen, Yanming Zhang, Fujun Li, Huier Zhang, Roman Liebe, Christoph Meyer, Steven Dooley, Zhongwei Zhu, Hong-Lei Weng, Jinzhu Jia, Tong Huang

**Supplementary Table 1.** Parameters measured in the annual health examinations.

|                                                 |
|-------------------------------------------------|
| Age                                             |
| Albumin                                         |
| AKP (alkaline phosphatase)                      |
| ALT ( alanine transaminase)                     |
| ApoA1 (Apolipoprotein A1)                       |
| ApoB (Apolipoprotein B2)                        |
| AST (aspartate transaminase)                    |
| BMI (Body mass index)                           |
| BLRV (whole blood low shear reduced viscosity)  |
| BLRI (relative index of whole blood low shear)  |
| BHRV (whole blood high shear reduced viscosity) |
| BHRI (relative index of whole blood high shear) |
| BVV200 (Whole blood viscosity value)            |
| BUN (blood urea nitrogen)                       |
| BUS (ultrasound prompt)                         |
| CRP (high sensitive C-reactive protein)         |
| Cr (creatinine)                                 |
| CA (carotid atherosclerosis )                   |
| DBIL (Direct bilirubin)                         |
| DBp (diastolic blood pressure)                  |
| DM (type II diabetes)                           |
| ESR (Blood sedimentation)                       |
| ESRKV (Blood sedimentation equation K value)    |
| Gender                                          |
| GLT (glutamyl transpeptidase)                   |
| Glucose                                         |
| HBP (Hypertension)                              |
| HBX (red blood cell deformation index TK)       |
| HCT (Hematocrit)                                |
| HCY (Homocysteine)                              |
| HDL (high density lipoprotein C)                |
| Height                                          |
| HGB (hemoglobin)                                |
| LDL (low density lipoprotein C)                 |
| LVH (left ventricular hypertrophy)              |
| MPV (mean platelet volume)                      |
| NAFLD (non-alcoholic fatty liver disease)       |
| PhyExa (physical examination results)           |
| PV (plasma viscosity)                           |
| PDW (Platelet distribution width)               |
| PLT (platelet)                                  |
| PCT ( prothrombin consumption time)             |
| RBC (red blood cell count)                      |
| SBp (systolic blood pressure)                   |
| TB (Total Bilirubin)                            |
| TC (Total cholesterol)                          |
| TG (Triglyceride)                               |

|                              |
|------------------------------|
| TP (total protein)           |
| UA (uric acid)               |
| Waist                        |
| Weight                       |
| WGR (white globulin ratio)   |
| WBC (white blood cell count) |

**Supplementary Table 2.** Prevalence of NAFLD in an eastern Chinese population (2006-2016)

|                   | 2006 | 2007 | 2008 | 2009 | 2010 | 2011 | 2012 | 2013 | 2014 | 2015 | 2016 |
|-------------------|------|------|------|------|------|------|------|------|------|------|------|
| <b>Total (n)</b>  | 9786 | 9852 | 9827 | 8026 | 8225 | 8309 | 8311 | 8552 | 8442 | 8463 | 8436 |
| NAFLD (n)         | 1687 | 1875 | 2161 | 1797 | 1871 | 1943 | 2033 | 2169 | 2356 | 2610 | 2734 |
| (%)               | 17.2 | 19.0 | 22.0 | 22.4 | 22.7 | 23.4 | 24.5 | 25.4 | 27.9 | 30.8 | 32.4 |
| <b>Male (n)</b>   | 6834 | 6872 | 6857 | 5468 | 5640 | 5692 | 5680 | 5891 | 5820 | 5812 | 5816 |
| NAFLD (n)         | 1399 | 1555 | 1790 | 1419 | 1488 | 1562 | 1616 | 1734 | 1896 | 2081 | 2152 |
| (%)               | 20.5 | 22.6 | 26.1 | 26.0 | 26.4 | 27.4 | 28.5 | 29.4 | 32.6 | 35.8 | 37.0 |
| ≤ 30ys (n)        | 1196 | 938  | 729  | 826  | 980  | 1092 | 1068 | 1163 | 1013 | 964  | 927  |
| NAFLD (n)         | 155  | 112  | 100  | 78   | 83   | 94   | 108  | 157  | 171  | 208  | 200  |
| (%)               | 13.0 | 11.9 | 13.7 | 9.4  | 8.5  | 8.6  | 10.1 | 13.5 | 16.9 | 21.6 | 21.6 |
| >30, ≤ 40ys (n)   | 2144 | 2292 | 2353 | 1504 | 1395 | 1248 | 1150 | 1096 | 1028 | 970  | 953  |
| NAFLD (n)         | 419  | 502  | 590  | 412  | 386  | 375  | 358  | 367  | 372  | 357  | 344  |
| (%)               | 19.5 | 21.9 | 25.1 | 27.4 | 27.7 | 30.0 | 31.1 | 33.5 | 36.2 | 36.8 | 36.1 |
| >40, ≤ 50ys (n)   | 1480 | 1465 | 1450 | 1107 | 1183 | 1211 | 1279 | 1299 | 1339 | 1360 | 1347 |
| NAFLD (n)         | 358  | 376  | 429  | 334  | 380  | 418  | 456  | 478  | 517  | 595  | 577  |
| (%)               | 24.2 | 25.7 | 29.6 | 30.2 | 32.1 | 34.5 | 35.7 | 36.8 | 38.6 | 43.8 | 42.8 |
| >50, ≤ 60ys (n)   | 1084 | 1180 | 1314 | 1033 | 1055 | 1068 | 1008 | 979  | 978  | 984  | 978  |
| NAFLD (n)         | 267  | 341  | 415  | 352  | 364  | 394  | 361  | 350  | 385  | 416  | 456  |
| (%)               | 24.6 | 28.9 | 31.6 | 34.1 | 34.5 | 36.9 | 35.8 | 35.8 | 39.4 | 42.3 | 46.6 |
| >60, ≤ 70ys (n)   | 635  | 655  | 622  | 553  | 547  | 574  | 632  | 774  | 834  | 879  | 937  |
| NAFLD (n)         | 137  | 147  | 165  | 151  | 159  | 172  | 202  | 243  | 292  | 331  | 382  |
| (%)               | 21.6 | 22.4 | 26.5 | 27.3 | 29.1 | 30.0 | 32.0 | 31.4 | 35.0 | 37.7 | 40.8 |
| >70ys (n)         | 295  | 342  | 389  | 445  | 480  | 499  | 543  | 580  | 628  | 655  | 674  |
| NAFLD (n)         | 63   | 77   | 91   | 92   | 116  | 109  | 131  | 139  | 159  | 174  | 193  |
| (%)               | 21.4 | 22.5 | 23.4 | 20.7 | 24.2 | 21.8 | 24.1 | 24.0 | 25.3 | 26.6 | 28.6 |
| <b>Female (n)</b> | 2952 | 2980 | 2970 | 2558 | 2585 | 2617 | 2631 | 2661 | 2622 | 2651 | 2620 |
| NAFLD (n)         | 288  | 320  | 371  | 378  | 383  | 381  | 417  | 435  | 460  | 529  | 582  |
| (%)               | 9.8  | 10.7 | 12.5 | 14.8 | 14.8 | 14.6 | 15.8 | 16.3 | 17.5 | 20.0 | 22.2 |
| ≤ 30ys (n)        | 209  | 167  | 147  | 143  | 213  | 251  | 248  | 270  | 239  | 244  | 214  |
| NAFLD (n)         | 5    | 4    | 4    | 1    | 0    | 1    | 2    | 8    | 9    | 14   | 13   |
| (%)               | 2.4  | 2.4  | 2.7  | 0.7  | 0.0  | 0.4  | 0.8  | 3.0  | 3.8  | 5.7  | 6.1  |
| >30, ≤ 40ys (n)   | 934  | 924  | 869  | 596  | 496  | 415  | 348  | 276  | 232  | 198  | 177  |
| NAFLD (n)         | 33   | 29   | 36   | 28   | 28   | 24   | 23   | 17   | 19   | 20   | 20   |
| (%)               | 3.5  | 3.1  | 4.1  | 4.7  | 5.6  | 5.8  | 6.6  | 6.2  | 8.2  | 10.1 | 11.3 |
| >40, ≤ 50ys (n)   | 801  | 785  | 776  | 627  | 666  | 701  | 733  | 754  | 707  | 704  | 658  |
| NAFLD (n)         | 54   | 60   | 63   | 62   | 69   | 76   | 85   | 88   | 84   | 98   | 99   |
| (%)               | 6.7  | 7.6  | 8.1  | 9.9  | 10.4 | 10.8 | 11.6 | 11.7 | 11.9 | 13.9 | 15.0 |
| >50, ≤ 60ys (n)   | 536  | 604  | 651  | 643  | 647  | 659  | 641  | 638  | 665  | 680  | 689  |
| NAFLD (n)         | 78   | 100  | 133  | 131  | 132  | 128  | 132  | 132  | 131  | 157  | 171  |
| (%)               | 14.6 | 16.6 | 20.4 | 20.4 | 20.4 | 19.4 | 20.6 | 20.7 | 19.7 | 23.1 | 24.8 |
| >60, ≤ 70ys (n)   | 367  | 368  | 367  | 358  | 347  | 347  | 380  | 417  | 438  | 461  | 494  |
| NAFLD (n)         | 94   | 96   | 92   | 99   | 95   | 92   | 106  | 117  | 123  | 140  | 159  |
| (%)               | 25.6 | 26.1 | 25.1 | 27.7 | 27.4 | 26.5 | 27.9 | 28.1 | 28.1 | 30.4 | 32.2 |
| >70ys (n)         | 105  | 132  | 160  | 191  | 216  | 244  | 281  | 306  | 341  | 364  | 388  |
| NAFLD (n)         | 24   | 31   | 43   | 57   | 59   | 60   | 69   | 73   | 94   | 100  | 120  |
| (%)               | 22.9 | 23.5 | 26.9 | 29.8 | 27.3 | 24.6 | 24.6 | 23.9 | 27.6 | 27.5 | 30.9 |

**Supplementary Table 3.** Prevalence of NAFLD in obese persons (BMI > 25) (2006-2016)

|                   | 2006 | 2007 | 2008 | 2009 | 2010 | 2011 | 2012 | 2013 | 2014 | 2015 | 2016 |
|-------------------|------|------|------|------|------|------|------|------|------|------|------|
| <b>Total (n)</b>  | 2445 | 2674 | 2749 | 2119 | 2314 | 2271 | 2218 | 2593 | 2159 | 2121 | 2106 |
| NAFLD             |      |      |      |      |      |      |      |      |      |      |      |
| (n)               | 1104 | 1256 | 1397 | 1103 | 1231 | 1218 | 1239 | 1387 | 1309 | 1384 | 1414 |
| (%)               | 45.2 | 47   | 50.8 | 52.1 | 53.2 | 53.6 | 55.9 | 53.5 | 60.6 | 65.3 | 67.1 |
| <b>Male (n)</b>   | 1927 | 2163 | 2232 | 1663 | 1822 | 1813 | 1744 | 2086 | 1728 | 1716 | 1699 |
| NAFLD             |      |      |      |      |      |      |      |      |      |      |      |
| (n)               | 912  | 1053 | 1180 | 885  | 1002 | 1001 | 1010 | 1153 | 1086 | 1147 | 1173 |
| (%)               | 47.3 | 48.7 | 52.9 | 53.2 | 55   | 55.2 | 57.9 | 55.3 | 62.8 | 66.8 | 69   |
| ≤ 30ys (n)        | 213  | 202  | 174  | 156  | 190  | 227  | 220  | 293  | 224  | 212  | 200  |
| NAFLD             |      |      |      |      |      |      |      |      |      |      |      |
| (n)               | 112  | 86   | 67   | 53   | 64   | 70   | 79   | 115  | 119  | 132  | 126  |
| (%)               | 52.6 | 42.6 | 38.5 | 34   | 33.7 | 30.8 | 35.9 | 39.2 | 53.1 | 62.3 | 63   |
| >30, ≤ 40ys (n)   | 549  | 640  | 689  | 427  | 428  | 375  | 346  | 407  | 310  | 302  | 291  |
| NAFLD             |      |      |      |      |      |      |      |      |      |      |      |
| (n)               | 269  | 325  | 388  | 259  | 250  | 229  | 226  | 247  | 229  | 211  | 206  |
| (%)               | 49   | 50.8 | 56.3 | 60.7 | 58.4 | 61.1 | 65.3 | 60.7 | 73.9 | 69.9 | 70.8 |
| >40, ≤ 50ys (n)   | 433  | 456  | 468  | 353  | 414  | 423  | 431  | 517  | 443  | 437  | 425  |
| NAFLD             |      |      |      |      |      |      |      |      |      |      |      |
| (n)               | 210  | 225  | 263  | 185  | 248  | 264  | 276  | 321  | 293  | 323  | 310  |
| (%)               | 48.5 | 49.3 | 56.2 | 52.4 | 59.9 | 62.4 | 64   | 62.1 | 66.1 | 73.9 | 72.9 |
| >50, ≤ 60ys (n)   | 351  | 447  | 491  | 364  | 390  | 392  | 353  | 381  | 312  | 309  | 303  |
| NAFLD             |      |      |      |      |      |      |      |      |      |      |      |
| (n)               | 173  | 240  | 280  | 222  | 236  | 247  | 209  | 226  | 207  | 217  | 232  |
| (%)               | 49.3 | 53.7 | 57   | 61   | 60.5 | 63   | 59.2 | 59.3 | 66.3 | 70.2 | 76.6 |
| >60, ≤ 70ys (n)   | 265  | 274  | 249  | 213  | 213  | 209  | 222  | 291  | 263  | 262  | 281  |
| NAFLD             |      |      |      |      |      |      |      |      |      |      |      |
| (n)               | 98   | 111  | 113  | 102  | 113  | 113  | 133  | 155  | 150  | 159  | 189  |
| (%)               | 37   | 40.5 | 45.4 | 47.9 | 53.1 | 54.1 | 59.9 | 53.3 | 57   | 60.7 | 67.3 |
| >70ys (n)         | 116  | 144  | 161  | 150  | 187  | 187  | 172  | 197  | 176  | 194  | 199  |
| NAFLD             |      |      |      |      |      |      |      |      |      |      |      |
| (n)               | 50   | 66   | 69   | 64   | 91   | 78   | 87   | 89   | 88   | 105  | 110  |
| (%)               | 43.1 | 45.8 | 42.9 | 42.7 | 48.7 | 41.7 | 50.6 | 45.2 | 50   | 54.1 | 55.3 |
| <b>Female (n)</b> | 518  | 511  | 517  | 456  | 492  | 458  | 474  | 507  | 431  | 405  | 407  |
| NAFLD             |      |      |      |      |      |      |      |      |      |      |      |
| (n)               | 192  | 203  | 217  | 218  | 229  | 217  | 229  | 234  | 223  | 237  | 241  |
| (%)               | 37.1 | 39.7 | 42   | 47.8 | 46.5 | 47.4 | 48.3 | 46.2 | 51.7 | 58.5 | 59.2 |
| ≤ 30ys (n)        | 15   | 5    | 11   | 9    | 6    | 12   | 13   | 15   | 13   | 14   | 16   |
| NAFLD             |      |      |      |      |      |      |      |      |      |      |      |
| (n)               | 3    | 1    | 2    | 0    | 0    | 1    | 2    | 5    | 5    | 5    | 7    |
| (%)               | 20   | 20   | 18.2 | 0    | 0    | 8.3  | 15.4 | 33.3 | 38.5 | 35.7 | 43.8 |
| >30, ≤ 40ys (n)   | 69   | 78   | 75   | 46   | 50   | 36   | 36   | 31   | 21   | 20   | 18   |
| NAFLD             |      |      |      |      |      |      |      |      |      |      |      |
| (n)               | 20   | 18   | 22   | 18   | 22   | 14   | 17   | 9    | 10   | 11   | 11   |
| (%)               | 29   | 23.1 | 29.3 | 39.1 | 44   | 38.9 | 47.2 | 29   | 47.6 | 55   | 61.1 |
| >40, ≤ 50ys (n)   | 101  | 107  | 109  | 83   | 90   | 88   | 94   | 115  | 89   | 76   | 66   |
| NAFLD             |      |      |      |      |      |      |      |      |      |      |      |
| (n)               | 37   | 41   | 41   | 34   | 36   | 39   | 44   | 48   | 45   | 46   | 35   |
| (%)               | 36.6 | 38.3 | 37.6 | 41   | 40   | 44.3 | 46.8 | 41.7 | 50.6 | 60.5 | 53   |
| >50, ≤ 60ys (n)   | 141  | 146  | 146  | 151  | 155  | 137  | 121  | 125  | 101  | 92   | 93   |
| NAFLD             |      |      |      |      |      |      |      |      |      |      |      |
| (n)               | 49   | 56   | 63   | 72   | 72   | 66   | 56   | 61   | 53   | 62   | 61   |
| (%)               | 34.8 | 38.4 | 43.2 | 47.7 | 46.5 | 48.2 | 46.3 | 48.8 | 52.5 | 67.4 | 65.6 |
| >60, ≤ 70ys (n)   | 141  | 127  | 115  | 103  | 115  | 105  | 120  | 127  | 109  | 105  | 105  |
| NAFLD             |      |      |      |      |      |      |      |      |      |      |      |
| (n)               | 64   | 66   | 58   | 59   | 65   | 59   | 68   | 67   | 57   | 63   | 66   |
| (%)               | 45.4 | 52   | 50.4 | 57.3 | 56.5 | 56.2 | 56.7 | 52.8 | 52.3 | 60   | 62.9 |
| >70ys (n)         | 51   | 48   | 61   | 64   | 76   | 80   | 90   | 94   | 98   | 98   | 109  |
| NAFLD             |      |      |      |      |      |      |      |      |      |      |      |
| (n)               | 19   | 21   | 31   | 35   | 34   | 38   | 42   | 44   | 53   | 50   | 61   |
| (%)               | 37.3 | 43.8 | 50.8 | 54.7 | 44.7 | 47.5 | 46.7 | 46.8 | 54.1 | 51   | 56   |

**Supplementary Table 4.** Logistic regression for risk factors of NAFLD

|             | Estimate | Std. Error | z value | OR       | 2.5% CI  | 97.5% CI | Pr(> z )   |
|-------------|----------|------------|---------|----------|----------|----------|------------|
| (Intercept) | -21.63   | 0.3151     | -68.631 | 4.05E-10 | 2.18E-10 | 7.49E-10 | < 0.001*** |
| BMI         | 0.3791   | 0.005224   | 72.563  | 1.460966 | 1.446132 | 1.476054 | < 0.001*** |
| albumin     | 0.0994   | 0.005635   | 17.64   | 1.104513 | 1.092391 | 1.116791 | < 0.001*** |
| WGR         | 0.2666   | 0.06118    | 4.357   | 1.305464 | 1.157849 | 1.471676 | < 0.001*** |
| WBC         | 0.06149  | 0.008274   | 7.432   | 1.063423 | 1.046307 | 1.080801 | < 0.001*** |
| TG          | 0.2447   | 0.01213    | 20.17   | 1.277201 | 1.247335 | 1.308081 | < 0.001*** |
| HDL         | -0.7862  | 0.04247    | -18.511 | 0.45558  | 0.419127 | 0.495053 | < 0.001*** |
| GLT         | 0.002947 | 0.000358   | 8.242   | 1.002952 | 1.002255 | 1.003661 | < 0.001*** |
| ALT         | 0.02717  | 0.001056   | 25.738  | 1.027538 | 1.025425 | 1.029676 | < 0.001*** |
| AST         | -0.0142  | 0.001834   | -7.745  | 0.985896 | 0.982336 | 0.989418 | < 0.001*** |
| Cr          | -0.02375 | 0.001025   | -23.177 | 0.976528 | 0.974562 | 0.978485 | < 0.001*** |
| ALP         | 0.000909 | 0.000547   | 1.661   | 1.000909 | 0.999835 | 1.001982 | 0.09664    |
| UA          | 0.00433  | 0.000176   | 24.542  | 1.004339 | 1.003992 | 1.004687 | < 0.001*** |
| Glu         | 0.2159   | 0.01197    | 18.044  | 1.241037 | 1.212327 | 1.270567 | < 0.001*** |
| SBp         | 0.006338 | 0.001014   | 6.252   | 1.006358 | 1.00436  | 1.008359 | < 0.001*** |
| DBp         | 0.003561 | 0.001546   | 2.303   | 1.003567 | 1.000532 | 1.006614 | 0.021265*  |
| ESR         | 0.03401  | 0.001808   | 18.808  | 1.034593 | 1.030931 | 1.038265 | < 0.001*** |
| HGB         | 0.01966  | 0.00121    | 16.252  | 1.019853 | 1.017441 | 1.022277 | < 0.001*** |
| PLT         | 0.002588 | 0.000249   | 10.401  | 1.002592 | 1.002102 | 1.003081 | < 0.001*** |
| ApoB        | 0.4143   | 0.05413    | 7.654   | 1.513337 | 1.361002 | 1.6827   | < 0.001*** |
| TB          | 0.00778  | 0.002057   | 3.782   | 1.00781  | 1.003739 | 1.011865 | < 0.001*** |

**Supplementary Table 5.** Cox regression for risk factors of NAFLD

|         | se(coef) | z value | coef     | HR       | lower .95 | upper .95 | Pr(> z )    |
|---------|----------|---------|----------|----------|-----------|-----------|-------------|
| BMI     | 0.005327 | 35.102  | 0.186996 | 1.205622 | 1.1930993 | 1.2182761 | < 0.001***  |
| Albumin | 0.009655 | 4.656   | 0.04495  | 1.045976 | 1.0263691 | 1.0659575 | < 0.001***  |
| WGR     | 0.096408 | 1.326   | 0.12788  | 1.136417 | 0.9407519 | 1.3727778 | 0.184691    |
| WBC     | 0.010893 | 4.087   | 0.044521 | 1.045527 | 1.0234412 | 1.0680884 | < 0.001***  |
| TG      | 0.011283 | 11.755  | 0.132633 | 1.141831 | 1.1168563 | 1.1673638 | < 0.001***  |
| HDL     | 0.071682 | -13.214 | -0.94719 | 0.387829 | 0.3369955 | 0.4463302 | < 0.001***  |
| GLT     | 0.000494 | 2.601   | 0.001285 | 1.001285 | 1.0003166 | 1.0022553 | 0.009302**  |
| ALT     | 0.001478 | 9.309   | 0.013757 | 1.013853 | 1.0109201 | 1.0167934 | < 0.001***  |
| AST     | 0.003074 | -4.965  | -0.01526 | 0.984853 | 0.978937  | 0.990805  | < 0.001***  |
| Cr      | 0.001677 | -5.609  | -0.00941 | 0.990637 | 0.9873861 | 0.9938985 | < 0.001***  |
| ALP     | 0.000871 | 1.451   | 0.001263 | 1.001264 | 0.9995565 | 1.0029745 | 0.146888    |
| UA      | 0.000277 | 11.14   | 0.003085 | 1.003089 | 1.0025451 | 1.0036338 | < 0.001***  |
| Glu     | 0.016397 | 3.771   | 0.061837 | 1.063788 | 1.0301446 | 1.0985309 | 0.000162*** |
| SBp     | 0.001643 | 1.485   | 0.00244  | 1.002443 | 0.9992205 | 1.0056749 | 0.137485    |
| DBp     | 0.002517 | 2.383   | 0.005996 | 1.006014 | 1.0010643 | 1.0109889 | 0.01719*    |
| ESR     | 0.003054 | 3.429   | 0.010473 | 1.010528 | 1.0044965 | 1.0165956 | 0.000606*** |
| HGB     | 0.002056 | 4.507   | 0.009269 | 1.009312 | 1.0052523 | 1.0133885 | < 0.001***  |
| PLT     | 0.000389 | 3.318   | 0.001291 | 1.001292 | 1.0005286 | 1.0020554 | 0.000905*** |
| ApoB    | 0.092419 | 11.569  | 1.069192 | 2.913026 | 2.4303962 | 3.4914963 | < 0.001***  |
| TB      | 0.003316 | -0.216  | -0.00072 | 0.999283 | 0.9928097 | 1.0057994 | 0.828863    |
